# Supplementary material
Source: Royal Society of Chemistry journal article supplement (doi:10.1039/d6cc01420h)

# Supporting Information

## Synthesis of fluorene-indole/benzofuran bicyclic molecules through palladium-catalyzed carboheterofunctionalization of alkynes

Huirong Li <sup>a</sup>, Wenyu Zhang <sup>a</sup>, Shuwei Zhang <sup>a</sup>, Wei Jiang <sup>b</sup>, Weiming Hu <sup>c\*</sup>, Junliang Zhang <sup>a, d\*</sup> and Lei Wang <sup>a\*</sup>

<sup>a</sup>*School of Chemistry & Chemical Engineering, Yangzhou University, Yangzhou 225002, China. E-mail: lei.wang@yzu.edu.cn*

<sup>b</sup>*College of Environmental Science & Engineering, Yangzhou University, Yangzhou, Jiangsu 225127, China.*

<sup>c</sup>*Jiangsu Key Laboratory of Function Control Technology for Advanced Materials, School of Environmental and Chemical Engineering, Jiangsu Ocean University, Lianyungang 222005, Jiangsu, China. E-mail: huweiming@jou.edu.cn*

<sup>d</sup>*Department of Chemistry, Fudan University, 2005 Songhu Road, Shanghai 200438, P. R. China. E-mail: junlian.zhang@fudan.edu.cn*

### Table of Contents

|                                                          |     |
|----------------------------------------------------------|-----|
| 1. General information .....                             | S2  |
| 2. General procedure .....                               | S3  |
| 3. Screening of reaction conditions .....                | S4  |
| 4. Gram-scale synthesis of 3c .....                      | S5  |
| 5. General procedure for preparation of substrates ..... | S5  |
| 6. Characterization data .....                           | S7  |
| 7. Synthetic transformations. ....                       | S40 |
| 8. Enantioselective synthesis of 3q. ....                | S43 |
| 9. Single Crystal X-Ray Diffraction .....                | S46 |
| 10. References .....                                     | S48 |
| 11. Copies of NMR spectra for new compounds .....        | S49 |

## 1. General information

Unless otherwise noted, all reactions were carried out under Argon atmosphere; materials obtained from commercial suppliers were used directly without further purification.  $^1\text{H}$  NMR spectra,  $^{13}\text{C}$  NMR spectra, and  $^{19}\text{F}$  NMR spectra were recorded on Agilent 400, Bruker 400 MHz, 600 MHz spectrometer in  $\text{CDCl}_3$ . NMR experiments are reported in  $\delta$  units, parts per million (ppm), and were referenced to  $\text{CDCl}_3$  ( $\delta$  7.26 or 77.0 ppm) as the internal standard. The data is being reported as (s = singlet, d = doublet, dd = doublet of doublet, t = triplet, m = multiplet or unresolved, br = broad signal, coupling constant(s) in Hz, integration). All the solvents were used directly without further purification. Reactions were monitored by TLC. Flash column chromatography was performed on silica (particle size 300-400 mesh ASTM, purchased from Yantai, China) and eluted with petroleum ether/ethyl acetate/acetone. Copies of NMR were processed with MestReNova Software. Single-crystal X-ray data were collected with a Bruker Smart APEX-2 CCD diffractometer. All the 2-(phenylethynyl)anilines substrates were synthesized according to the literature<sup>[1]</sup>.

## 2. General procedure

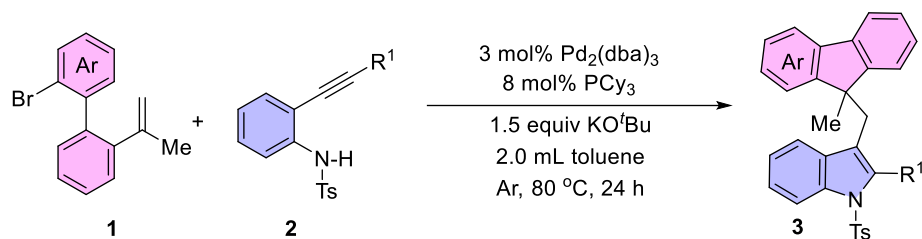

A sealed tube (10 mL) equipped with a magnetic stir bar was charged with Pd<sub>2</sub>(dba)<sub>3</sub> (5.5 mg, 0.006 mmol, 0.03 equiv), PCy<sub>3</sub> (4.5 mg, 0.016 mmol, 0.08 equiv), KO<sup>t</sup>Bu (33.7 mg, 0.30 mmol, 1.5 equiv), aryl halide **1** (0.20 mmol, 1.0 equiv), *ortho*-ethynylaniline **2** (0.26 mmol, 1.3 equiv), and 2.0 mL toluene were added sequentially. Degassed toluene and backfilled with argon for 3 times (3× 1 min) at -78 °C. The reaction mixture was kept stirring at 80 °C for 24 h by use of module heating. After completion of the reaction (monitored by TLC), the mixture was concentrated in vacuum and the residue was purified by flash column chromatography on silica gel with petroleum ether-acetone or petroleum ether- ethyl acetate as eluent to give the desired product **3**.

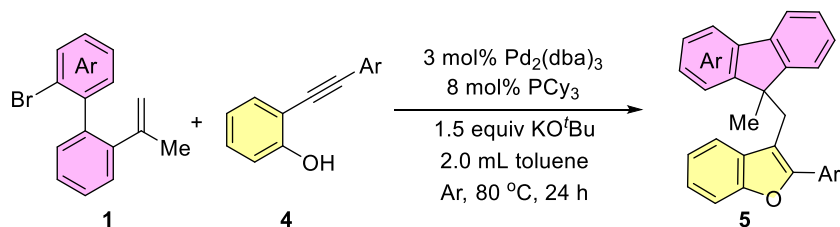

A sealed tube (10 mL) equipped with a magnetic stir bar was charged with Pd<sub>2</sub>(dba)<sub>3</sub> (5.5 mg, 0.006 mmol, 0.03 equiv), PCy<sub>3</sub> (4.5 mg, 0.016 mmol, 0.08 equiv), KO<sup>t</sup>Bu (33.7 mg, 0.30 mmol, 1.5 equiv), aryl halide **1** (0.20 mmol, 1.0 equiv), *ortho*-ethynylphenols **4** (0.26 mmol, 1.3 equiv) and 2.0 mL toluene were added sequentially. Degassed toluene and backfilled with argon for 3 times (3× 1 min) at -78 °C. The reaction mixture was kept stirring at 80 °C for 24 h by use of module heating. After completion of the reaction (monitored by TLC), the mixture was concentrated in vacuum and the residue was purified by flash column chromatography on silica gel with petroleum ether-acetone or petroleum ether- ethyl acetate as eluent to give the desired product **5**.

### 3. Screening of reaction conditions

**Table S1 Optimization of reaction conditions conditions of 3-((9-methyl-9H-fluoren-9-yl)methyl)-2-phenyl-1-tosyl-1H-indole<sup>a</sup>**

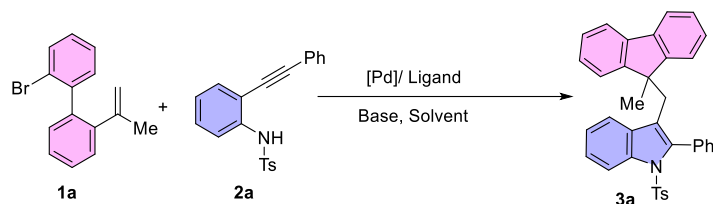

| Entry           | Pd sources                         | Ligand           | Base                           | Solvent     | Yield(%) <sup>b</sup> |
|-----------------|------------------------------------|------------------|--------------------------------|-------------|-----------------------|
| 1               | Pd <sub>2</sub> (dba) <sub>3</sub> | RuPhos           | NaO <sup>t</sup> Bu            | Toluene     | 19                    |
| 2               | Pd <sub>2</sub> (dba) <sub>3</sub> | XPhos            | NaO <sup>t</sup> Bu            | Toluene     | 8                     |
| 3               | Pd <sub>2</sub> (dba) <sub>3</sub> | PCy <sub>3</sub> | NaO <sup>t</sup> Bu            | Toluene     | 60                    |
| 4               | Pd <sub>2</sub> (dba) <sub>3</sub> | SPhos            | NaO <sup>t</sup> Bu            | Toluene     | 11                    |
| 5               | Pd <sub>2</sub> (dba) <sub>3</sub> | /                | NaO <sup>t</sup> Bu            | Toluene     | NR                    |
| 6 <sup>c</sup>  | Pd(OAc) <sub>2</sub>               | PCy <sub>3</sub> | NaO <sup>t</sup> Bu            | Toluene     | 43                    |
| 7               | [Pd(allyl)Cl] <sub>2</sub>         | PCy <sub>3</sub> | NaO <sup>t</sup> Bu            | Toluene     | 57                    |
| 8 <sup>c</sup>  | Pd(cod)Cl <sub>2</sub>             | PCy <sub>3</sub> | NaO <sup>t</sup> Bu            | Toluene     | 31                    |
| 9 <sup>c</sup>  | Pd(TFA) <sub>2</sub>               | PCy <sub>3</sub> | NaO <sup>t</sup> Bu            | Toluene     | 35                    |
| 10              | /                                  | PCy <sub>3</sub> | NaO <sup>t</sup> Bu            | Toluene     | NR                    |
| 11              | Pd <sub>2</sub> (dba) <sub>3</sub> | PCy <sub>3</sub> | KO <sup>t</sup> Bu             | Toluene     | 97                    |
| 12              | Pd <sub>2</sub> (dba) <sub>3</sub> | PCy <sub>3</sub> | LiO <sup>t</sup> Bu            | Toluene     | 11                    |
| 13              | Pd <sub>2</sub> (dba) <sub>3</sub> | PCy <sub>3</sub> | K <sub>2</sub> CO <sub>3</sub> | Toluene     | 88                    |
| 14              | Pd <sub>2</sub> (dba) <sub>3</sub> | PCy <sub>3</sub> | KOAc                           | Toluene     | 12                    |
| 15              | Pd <sub>2</sub> (dba) <sub>3</sub> | PCy <sub>3</sub> | DABCO                          | Toluene     | 58                    |
| 16              | Pd <sub>2</sub> (dba) <sub>3</sub> | PCy <sub>3</sub> | Et <sub>3</sub> N              | Toluene     | trace                 |
| 17              | Pd <sub>2</sub> (dba) <sub>3</sub> | PCy <sub>3</sub> | /                              | Toluene     | NR                    |
| 18              | Pd <sub>2</sub> (dba) <sub>3</sub> | PCy <sub>3</sub> | KO <sup>t</sup> Bu             | Mesitylene  | 77                    |
| 19              | Pd <sub>2</sub> (dba) <sub>3</sub> | PCy <sub>3</sub> | KO <sup>t</sup> Bu             | THF         | 89                    |
| 20              | Pd <sub>2</sub> (dba) <sub>3</sub> | PCy <sub>3</sub> | KO <sup>t</sup> Bu             | 1,4-dioxane | NR                    |
| 21              | Pd <sub>2</sub> (dba) <sub>3</sub> | PCy <sub>3</sub> | KO <sup>t</sup> Bu             | DCE         | 45                    |
| 22              | Pd <sub>2</sub> (dba) <sub>3</sub> | PCy <sub>3</sub> | KO <sup>t</sup> Bu             | DMSO        | NR                    |
| 23              | Pd <sub>2</sub> (dba) <sub>3</sub> | PCy <sub>3</sub> | KO <sup>t</sup> Bu             | DMF         | NR                    |
| 24              | Pd <sub>2</sub> (dba) <sub>3</sub> | PCy <sub>3</sub> | KO <sup>t</sup> Bu             | DMA         | NR                    |
| 25 <sup>d</sup> | Pd <sub>2</sub> (dba) <sub>3</sub> | PCy <sub>3</sub> | KO <sup>t</sup> Bu             | Toluene     | 50                    |

<sup>a</sup>Reaction conditions: <sup>a</sup>Reaction conditions: **1a** (0.2 mmol), **2a** (0.26 mmol), 3 mol% of Pd catalyst, ligands (8 mol%), base (1.5 equiv) in 2.0 mL toluene under argon at 80 °C for 24 h. <sup>b</sup>Isolated yields.

<sup>c</sup>Pd catalyst (6 mol%) were used. <sup>d</sup>Under air for 24 h.

## 4. Gram-scale synthesis of 3c

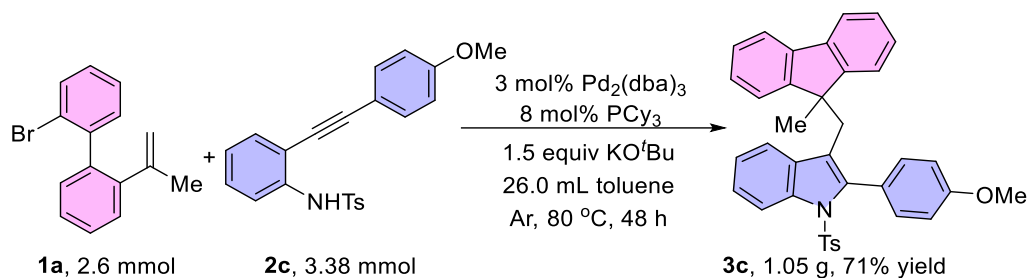

A sealed tube (100 mL) equipped with a magnetic stir bar was charged with Pd<sub>2</sub>(dba)<sub>3</sub> (71.4 mg, 0.078 mmol, 0.03 equiv), PCy<sub>3</sub> (58.3 mg, 0.208 mmol, 0.08 equiv), 2-bromo-2'-(prop-1-en-2-yl)-1,1'-biphenyl **1a** (0.710 g, 2.6 mmol, 1.0 equiv), *N*-(2-((4-methoxyphenyl)ethynyl)phenyl)-4-methylbenzenesulfonamide **2c** (1.275 g, 3.38 mmol, 1.3 equiv), KO<sup>t</sup>Bu (437.6 mg, 3.9 mmol, 1.5 equiv) and 26 mL toluene were added sequentially. Degassed toluene and backfilled with argon for 3 times (3 × 1 min) at -78 °C. The reaction mixture was kept stirring at 80 °C for 24 h by use of oil bath heating. After completion of the reaction (monitored by TLC), the mixture was concentrated in vacuum and the residue was purified by flash column chromatography on silica gel with petroleum ether-ethyl acetate as eluent to give the desired product **3c** (71% yield, 1.05 g).

## 5. General procedure for preparation of substrates

### 5.1 General procedure for the synthesis Biphenyl-Alkene substrates 1a.

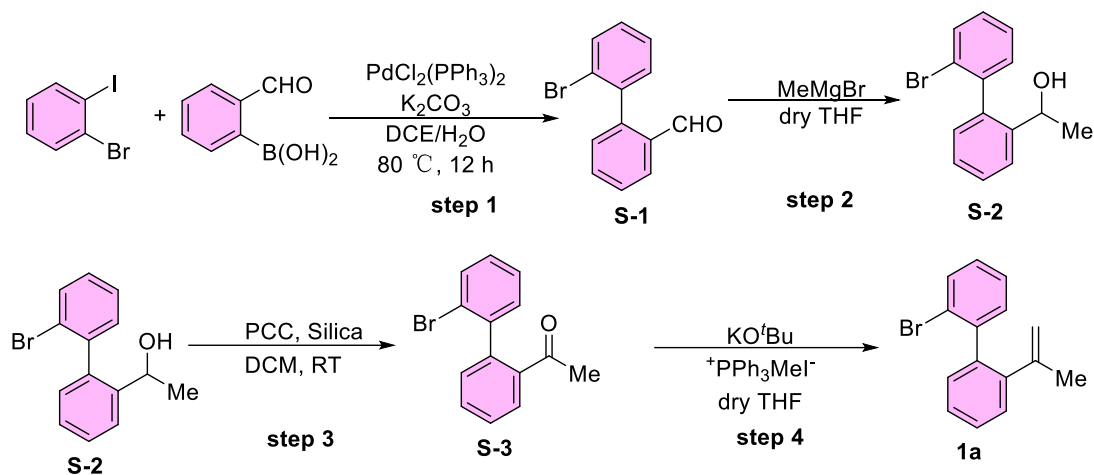

**Step 1.** 2'-bromo-1,1'-biphenyl-2-carbaldehyde (**S-1**) was synthesized according to the literature<sup>[2]</sup>.

**Step 2.** Under argon atmosphere, an oven-dried Schlenk tube equipped with a magnetic stir bar was charged with 2'-bromo-1,1'-biphenyl-2-carbaldehyde (**S-1**) (4.78 g, 18.3 mmol). Dry THF (35 mL) was then added. A solution of and the mixture was stirred at 0°C, MeMgBr (25.6 mL, 25.6 mmol) was added dropwise at 0 °C. Then, the solution was stirred at 0 °C and allowing to naturally warm up to room temperature. After the reaction was complete, the reaction was quenched with saturated aqueous NH<sub>4</sub>Cl (2 × 15 mL), extracted with ethyl acetate (2 × 20 mL), and concentrated to give the products **S-2** for the next step.

**Step 3.** Under argon atmosphere, an oven-dried Schlenk tube equipped with a magnetic stir bar was charged with PCC (11.38 g, 52.8 mmol) and silica (11.38 g) gel in 60 mL dichloromethane. **S-2** (4.88 g, 17.6 mmol) was then added and stirred at room temperature overnight. After the reaction is complete. The reaction solution is filtered through a diatomaceous earth pad, concentration in vacuo followed by silica gel column purification gave the desired product **S-3** (4.32 g, 90%, petroleum ether: ethyl acetate, 20:1).

**Step 4.** An oven-dried round-bottom flask was charged with CH<sub>3</sub>PPh<sub>3</sub>I (12.69 g, 31.4 mmol) and Dry THF (100 mL). KO<sup>t</sup>Bu (5.29 g, 47.1 mmol) was added to the suspension at 0 °C. The resulting mixture was allowed to warm up to room temperature and stirred for 1 h. The yellow suspension was cooled to 0 °C again followed by portion-wise addition of the carbonyl substrate **S-3** (4.32 g, 15.7 mmol). Subsequently, the mixture was further stirred at room temperature for 12 hours. After the completion of the reaction, the solvent was removed by evaporation, the resulting mixture was diluted with saturated aqueous NH<sub>4</sub>Cl (30 mL) and extract with ethyl acetate (3 × 20 mL), and the combined organic layer was dried with anhydrous Na<sub>2</sub>SO<sub>4</sub>. Concentration in vacuo followed by silica gel column purification with petroleum ether/ethyl acetate eluent gave the desired product **1a** (3.60 g, 84%, petroleum ether: ethyl acetate, 100:1).

5.2. Synthesis the substrates **1b-1d** method follows the method of synthesis **1a**.

## 6. Characterization data

### 6.1 Characterization data for the substrates.

#### 2-bromo-2'-(prop-1-en-2-yl)-1,1'-biphenyl (**1a**)

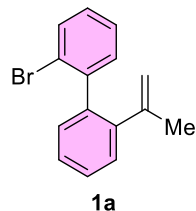

Flash column chromatography on a silica gel (petroleum ether: ethyl acetate, 100:1) give the product **1a** (3.60 g, 84% yield) as a white solid from the corresponding ketone **S-3** (4.32 g, 15.7 mmol). Mp: 51-53 °C.

$^1\text{H NMR}$  ( $\text{CDCl}_3$ , 400 MHz)  $\delta$  7.63 (d,  $J=8.0$  Hz, 1H), 7.39-7.32 (m, 3H), 7.30-7.28 (m, 1H), 7.26-7.16 (m, 3H), 4.98 (s, 1H), 4.83 (s, 1H), 1.78 (s, 3H);

$^{13}\text{C NMR}$  ( $\text{CDCl}_3$ , 100 MHz)  $\delta$  144.8, 142.7, 142.6, 138.8, 132.5, 131.5, 130.4, 128.5, 128.3, 127.8, 126.8, 126.5, 123.7, 116.3, 23.5;

**HRMS** Calcd (ESI)  $m/z$  for  $\text{C}_{15}\text{H}_{13}\text{Br Na}$   $[\text{M} + \text{Na}]^+$ : 295.0093, found: 295.0092.

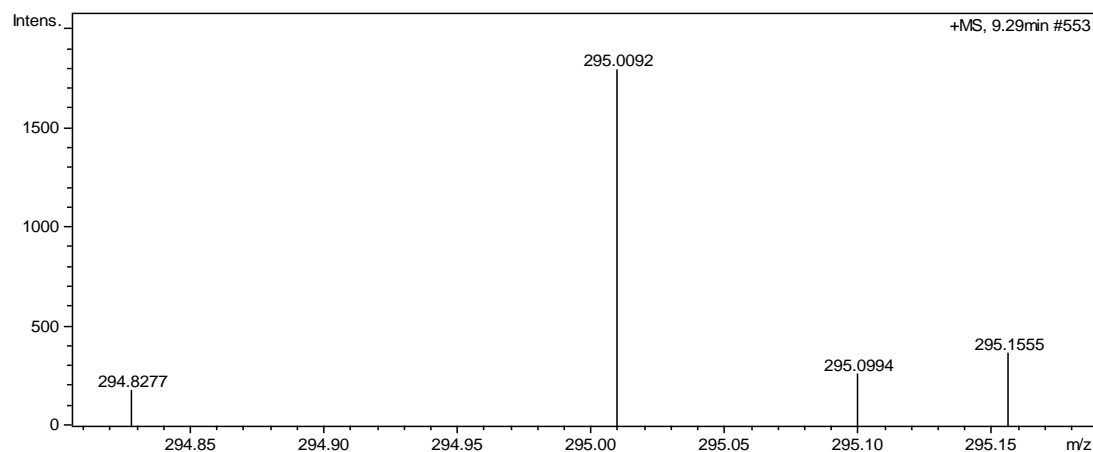

#### 2-bromo-5-methyl-2'-(prop-1-en-2-yl)-1,1'-biphenyl (**1b**)

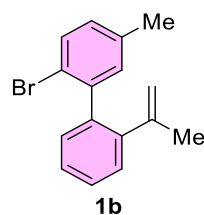

Flash column chromatography on a silica gel (petroleum ether: ethyl acetate, 100:1) give the product **1b** (3.78 g, 84% yield) as a white solid from the corresponding ketone

(4.54 g, 15.7 mmol). Mp: 50-52 °C.

$^1\text{H NMR}$  ( $\text{CDCl}_3$ , 400 MHz)  $\delta$  7.50 (d,  $J=8.0$  Hz, 1H), 7.38-7.29 (m, 3H), 7.21-7.19 (m, 1H), 7.07 (s, 1H), 7.01-6.99 (m, 1H), 4.99 (s, 1H), 4.85 (s, 1H), 2.31 (s, 3H), 1.80 (s, 3H);

$^{13}\text{C NMR}$  ( $\text{CDCl}_3$ , 100 MHz)  $\delta$  144.9, 142.7, 142.3, 138.9, 136.6, 132.2 (2C), 130.4, 129.4, 128.2, 127.6, 126.5, 120.2, 116.1, 23.5, 20.9;

**HRMS** Calcd (ESI)  $m/z$  for  $\text{C}_{16}\text{H}_{16}\text{Br}$   $[\text{M} + \text{H}]^+$ : 287.0430, found: 287.0426.

LHR-1-12 #1549 RT: 6.91 AV: 1 NL: 6.44E7  
T: FTMS + p ESI Full ms [100.0000-1000.0000]

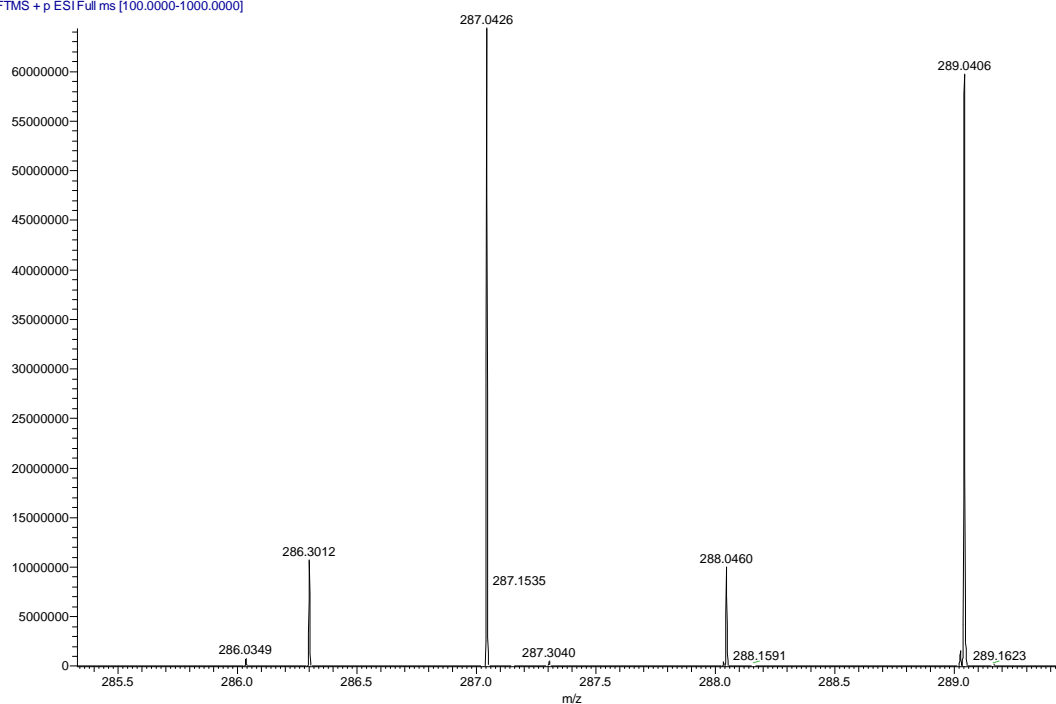

### 2-bromo-4-methoxy-2'-(prop-1-en-2-yl)-1,1'-biphenyl (**1c**)

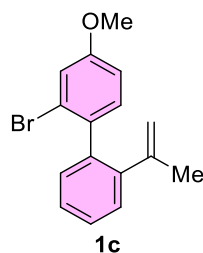

Flash column chromatography on a silica gel (petroleum ether: ethyl acetate, 90:1) give the product **1c** (0.74 g, 76% yield) as a white oil from the corresponding ketone (0.96 g, 3.2 mmol).

$^1\text{H NMR}$  ( $\text{CDCl}_3$ , 400 MHz)  $\delta$  7.36-7.33 (m, 2H), 7.32-7.29 (m, 1H), 7.22-7.19 (m, 2H), 7.15 (d,  $J=8.4$  Hz, 1H), 6.88-6.85 (m, 1H), 4.99 (s, 1H), 4.85 (s, 1H), 3.84 (s, 3H),

1.77 (s, 3H);

$^{13}\text{C}$  NMR ( $\text{CDCl}_3$ , 100 MHz)  $\delta$  159.0, 145.2, 143.1, 138.4, 134.8, 131.9, 130.9, 128.3, 127.6, 126.5, 123.8, 117.5, 116.1, 113.1, 55.5, 23.4;

HRMS Calcd (ESI)  $m/z$  for  $\text{C}_{16}\text{H}_{16}\text{BrO}$   $[\text{M} + \text{H}]^+$ : 303.0379, found: 303.0377.

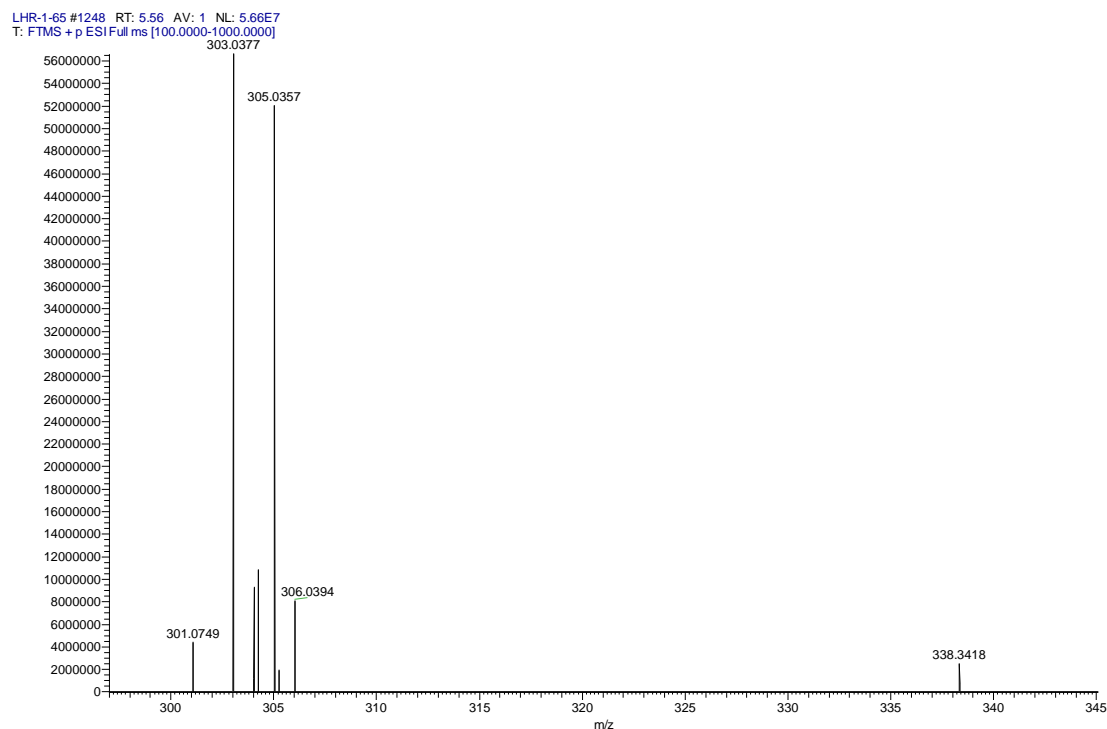

### 2-bromo-5-fluoro-2'-(prop-1-en-2-yl)-1,1'-biphenyl (**1d**)

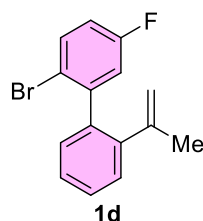

Flash column chromatography on a silica gel (petroleum ether: ethyl acetate, 100:1) give the product **1d** (0.80 g, 86% yield) as a white solid from the corresponding ketone (0.95 g, 3.2 mmol). Mp: 36-38 °C.

$^1\text{H}$  NMR ( $\text{CDCl}_3$ , 400 MHz)  $\delta$  7.58 (dd,  $J_1 = 8.8$  Hz,  $J_2 = 5.6$  Hz, 1H), 7.41-7.35 (m, 2H), 7.33-7.31 (m, 1H), 7.20-7.18 (m, 1H), 6.99 (dd,  $J_1 = 9.2$  Hz,  $J_2 = 3.2$  Hz, 1H), 6.95-6.90 (m, 1H), 5.01 (s, 1H), 4.83 (s, 1H), 1.82 (s, 3H);

$^{13}\text{C}$  NMR ( $\text{CDCl}_3$ , 100 MHz)  $\delta$  161.4 (d,  $J = 246.1$  Hz), 144.5 (d,  $J = 7.9$  Hz), 144.4, 142.6, 137.8, 133.7 (d,  $J = 8.2$  Hz), 130.2, 128.3, 128.2, 126.6, 118.5 (d,  $J = 22.4$  Hz), 118.0 (d,  $J = 3.1$  Hz), 116.6, 115.7 (d,  $J = 22.3$  Hz), 23.5;

$^{19}\text{F}$  NMR ( $\text{CDCl}_3$ , 376 MHz)  $\delta$  -115.7;

HRMS Calcd (ESI)  $m/z$  for  $\text{C}_{15}\text{H}_{13}\text{BrF}$   $[\text{M} + \text{H}]^+$ : 291.0179, found: 291.0179.

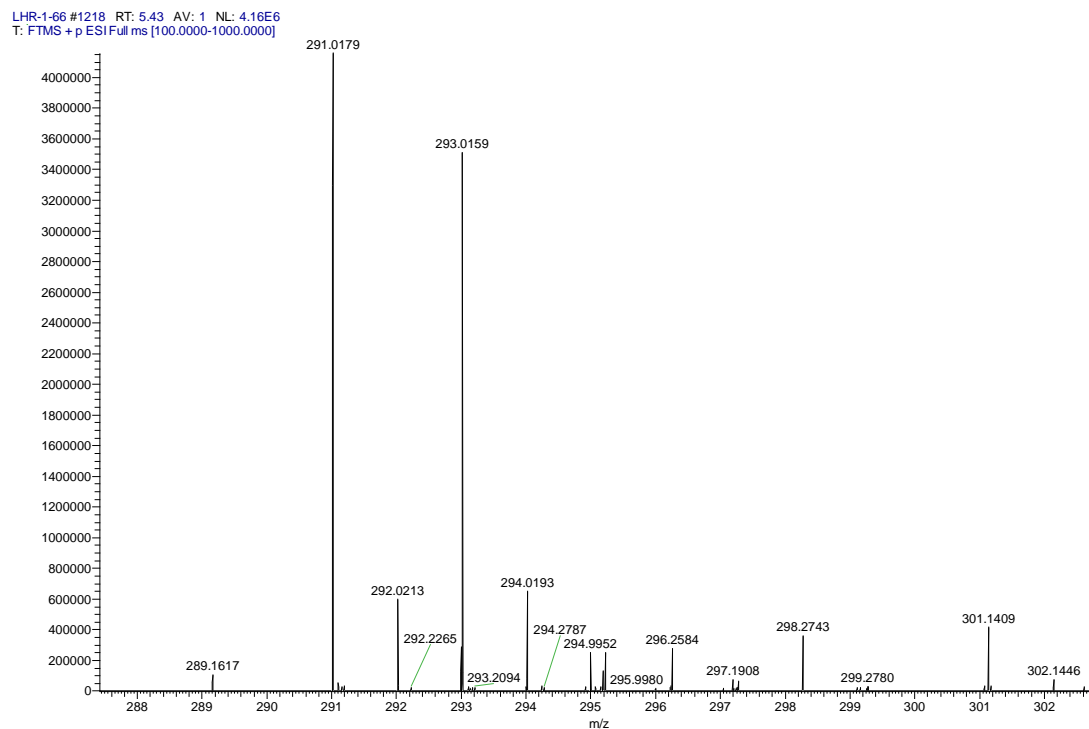

### 2-bromo-4-chloro-2'-(prop-1-en-2-yl)-1,1'-biphenyl (**1e**)

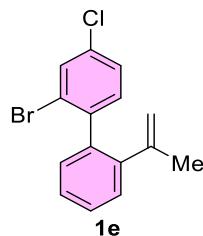

Flash column chromatography on a silica gel (petroleum ether: ethyl acetate, 100:1) give the product **1e** (0.74 g, 75% yield) as a white oil from the corresponding ketone (0.97 g, 3.2 mmol).

$^1\text{H}$  NMR ( $\text{CDCl}_3$ , 400 MHz)  $\delta$  7.66-7.65 (m, 1H), 7.40-7.32 (m, 3H), 7.29 (dd,  $J_1 = 8.4$  Hz,  $J_2 = 2.0$  Hz, 1H), 7.19-7.17 (m, 2H), 5.00 (s, 1H), 4.81 (s, 1H), 1.80 (s, 3H);

$^{13}\text{C}$  NMR ( $\text{CDCl}_3$ , 100 MHz)  $\delta$  144.5, 142.8, 141.2, 137.6, 133.4, 132.2 (2C), 130.4, 128.3, 128.1, 127.1, 126.6, 124.0, 116.6, 23.6;

HRMS Calcd (ESI)  $m/z$  for  $\text{C}_{15}\text{H}_{13}\text{BrCl}$   $[\text{M} + \text{H}]^+$ : 306.9884, found: 306.9882.

LHR-1-67 #1903 RT: 8.49 AV: 1 NL: 6.47E5  
T: FTMS + p ESIFull ms [100.0000-1000.0000]

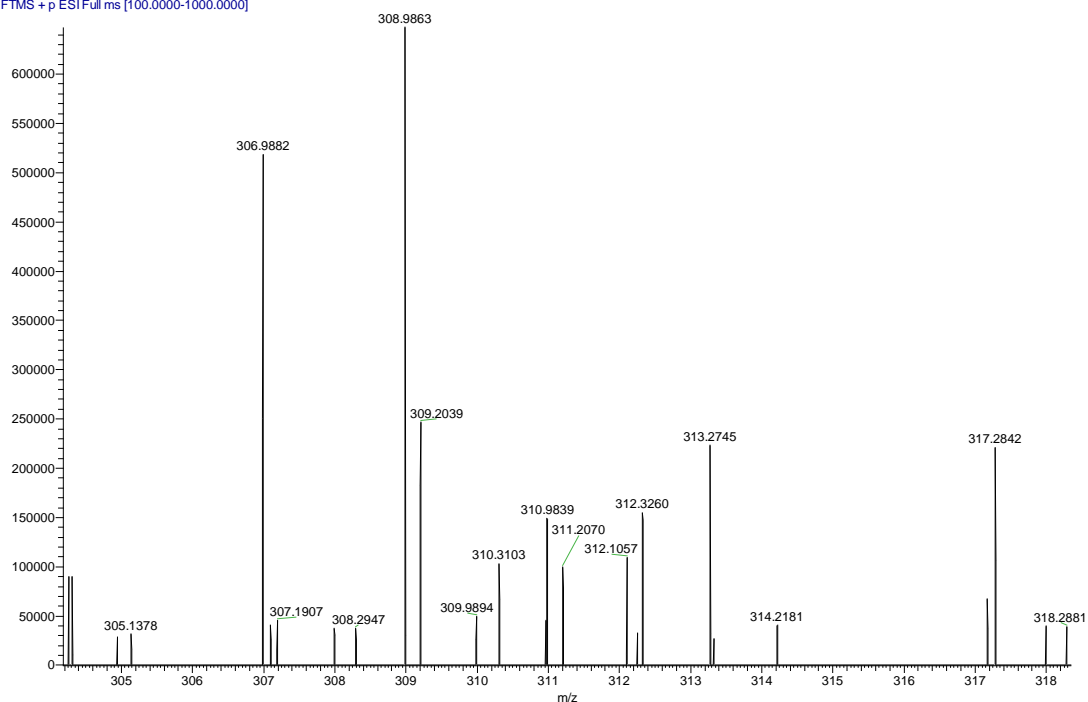

## 6.2. Characterization data for the product.

### 3-((9-methyl-9H-fluoren-9-yl)methyl)-2-phenyl-1-tosyl-1H-indole (**3a**)

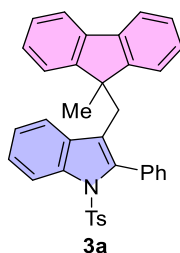

Flash column chromatography on a silica gel (petroleum ether: ethyl acetate, 18: 1) give the product **3a** (104.7 mg, 97% yield) as a yellow solid. Mp: 152-153 °C.

$^1\text{H NMR}$  ( $\text{CDCl}_3$ , 400 MHz)  $\delta$  8.34 (d,  $J = 8.4$  Hz, 1H), 7.65 (d,  $J = 7.6$  Hz, 2H), 7.40-7.36 (m, 1H), 7.33-7.28 (m, 6H), 7.26-7.25 (m, 1H), 7.10-7.03 (m, 7H), 6.92 (d,  $J = 7.6$  Hz, 1H), 6.88 (d,  $J = 7.2$  Hz, 2H), 2.95 (s, 2H), 2.32 (s, 3H), 1.32 (s, 3H);

$^{13}\text{C NMR}$  ( $\text{CDCl}_3$ , 100 MHz)  $\delta$  151.7, 144.4, 139.3, 138.7, 136.7, 135.5, 131.9, 131.1 (2C), 129.2, 128.4, 127.1, 127.0, 126.8 (2C), 124.5, 123.8, 123.0, 120.9, 120.8, 119.8, 115.4, 51.2, 35.1, 25.0, 21.5;

**HRMS** Calcd (ESI)  $m/z$  for  $\text{C}_{36}\text{H}_{29}\text{NNaO}_2\text{S}$  [ $\text{M} + \text{Na}$ ] $^+$ : 562.1811, found: 562.1816.

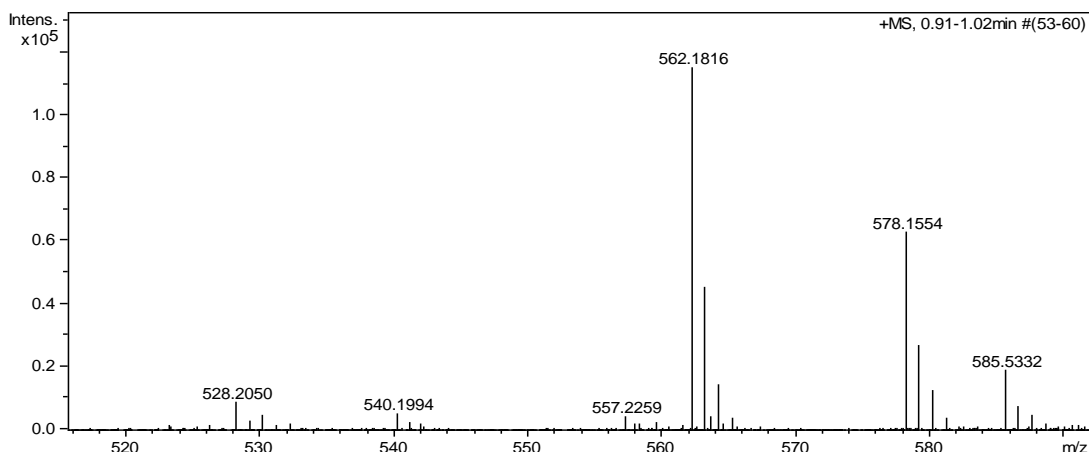

### 3-((9-methyl-9H-fluoren-9-yl)methyl)-2-(p-tolyl)-1-tosyl-1H-indole (**3b**)

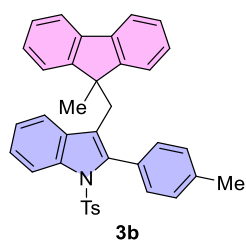

Flash column chromatography on a silica gel (petroleum ether: ethyl acetate, 18: 1) give the product **3b** (61.3 mg, 55% yield) as a yellow solid. Mp: 150-151 °C.

<sup>1</sup>H NMR (CDCl<sub>3</sub>, 400 MHz) δ 8.32 (d, *J* = 8.4 Hz, 1H), 7.65 (d, *J* = 7.6 Hz, 2H), 7.34-7.27 (m, 5H), 7.13-7.09 (m, 4H), 7.07-7.02 (m, 3H), 6.93-6.87 (m, 5H), 2.94 (s, 2H), 2.42 (s, 3H), 2.33 (s, 3H), 1.33 (s, 3H);

<sup>13</sup>C NMR (CDCl<sub>3</sub>, 100 MHz) δ 151.8, 144.3, 139.3, 138.9, 138.2, 136.7, 135.6, 131.7, 131.3, 129.2, 128.2, 127.9, 127.0, 126.8, 126.7, 124.4, 123.9, 123.0, 120.9, 120.7, 119.8, 115.5, 51.2, 35.1, 25.1, 21.5 (2C);

HRMS Calcd (ESI) m/z for C<sub>37</sub>H<sub>32</sub>NO<sub>2</sub>S [M + H]<sup>+</sup>: 554.2148, found: 554.2148.

LHR-1-54-5 #1869 RT: 8.34 AV: 1 NL: 6.41E6  
T: FTMS + p ESI Full ms [100.0000-1000.0000]

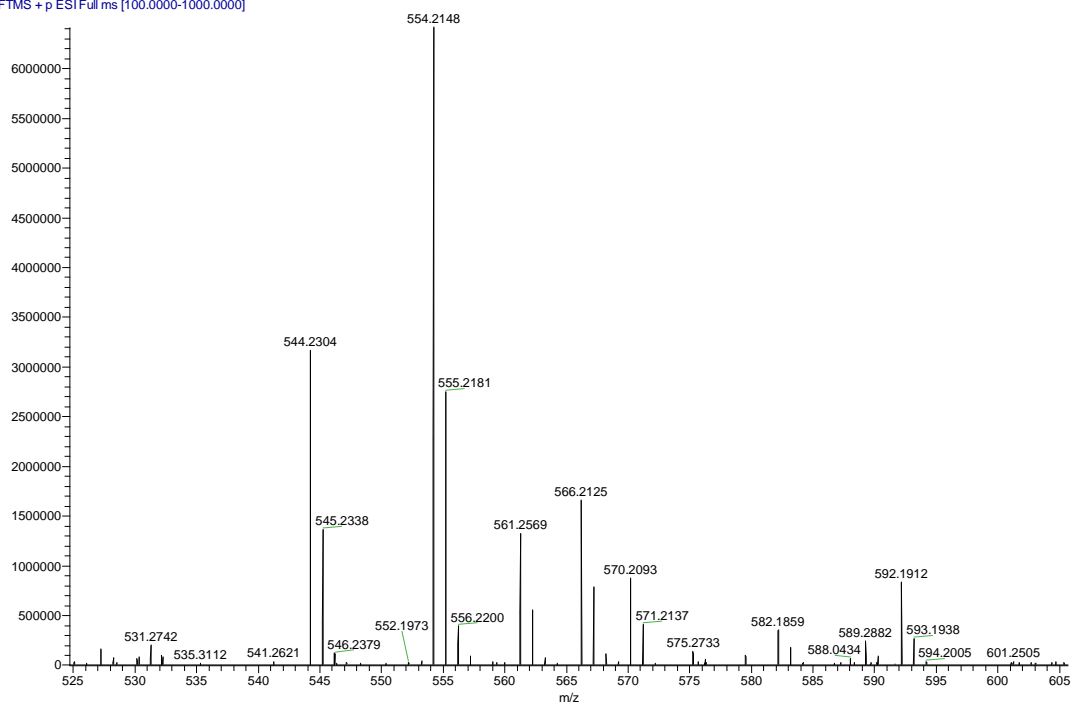

### 2-(4-methoxyphenyl)-3-((9-methyl-9H-fluoren-9-yl)methyl)-1-tosyl-1H-indole (**3c**)

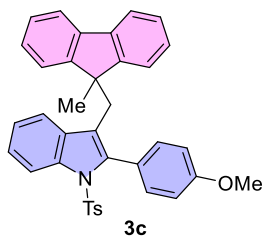

Flash column chromatography on a silica gel (petroleum ether: ethyl acetate, 10: 1) give the product **3c** (109.3 mg, 96% yield) as a yellow solid. Mp: 105-107 °C.

<sup>1</sup>H NMR (CDCl<sub>3</sub>, 400 MHz) δ 8.31 (d, *J* = 8.4 Hz, 1H), 7.62 (d, *J* = 7.6 Hz, 2H), 7.29-7.24 (m, 5H), 7.07 (d, *J* = 8.4 Hz, 2H), 7.04-7.00 (m, 3H), 7.91-6.86 (m, 5H), 6.81-6.79 (m, 2H), 3.85 (s, 3H), 2.91 (s, 2H), 2.31 (s, 3H), 1.32 (s, 3H);

<sup>13</sup>C NMR (CDCl<sub>3</sub>, 100 MHz) δ 159.5, 151.8, 144.3, 139.3, 138.6, 136.6, 135.7, 133.2, 131.2, 129.2, 127.0, 126.8, 126.7, 124.3, 123.9, 123.2, 122.9, 120.8, 120.6, 119.8, 115.4, 112.6, 55.2, 51.2, 35.1, 25.1, 21.5;

HRMS Calcd (ESI) m/z for C<sub>37</sub>H<sub>31</sub>NNaO<sub>3</sub>S [M + Na]<sup>+</sup>: 592.1917, found: 592.1909.

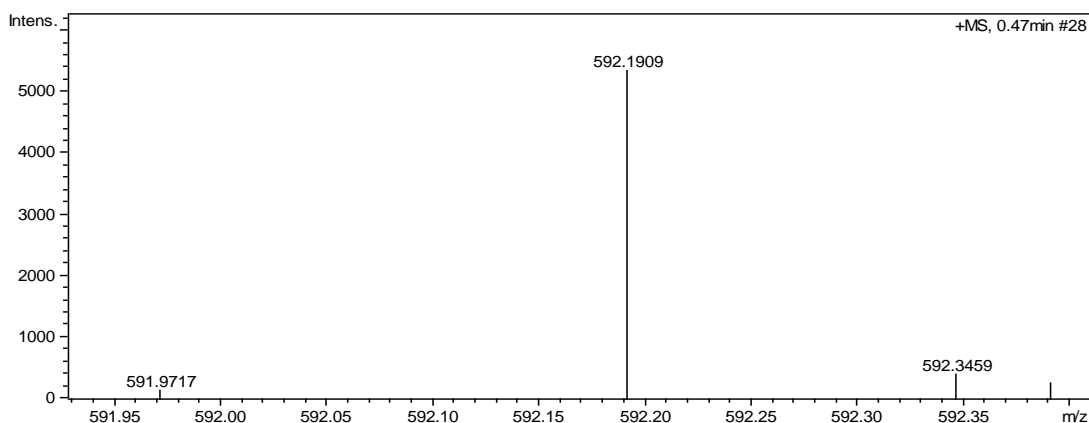

**2-(4-(tert-butyl)phenyl)-3-((9-methyl-9H-fluoren-9-yl)methyl)-1-tosyl-1H-indole**

**(3d)**

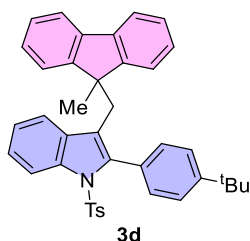

Flash column chromatography on a silica gel (petroleum ether: ethyl acetate, 18: 1) give the product **3d** (101.3 mg, 85% yield) as a yellow solid. Mp: 139-140 °C.

$^1\text{H NMR}$  ( $\text{CDCl}_3$ , 400 MHz)  $\delta$  8.29 (d,  $J = 8.4$  Hz, 1H), 7.61 (d,  $J = 7.6$  Hz, 2H), 7.28-7.23 (m, 7H), 7.05-7.00 (m, 5H), 6.94-6.92 (m, 2H), 6.88-6.84 (m, 3H), 2.93 (s, 2H), 2.29 (s, 3H), 1.36 (s, 9H), 1.28 (s, 3H);

$^{13}\text{C NMR}$  ( $\text{CDCl}_3$ , 100 MHz)  $\delta$  151.8, 151.3, 144.2, 139.3, 138.9, 136.7, 135.5, 131.6, 131.2, 129.2, 128.0, 126.9 (2C), 126.8, 124.3, 124.0, 123.8, 122.9, 120.8, 120.6, 119.7, 115.4, 51.2, 35.0, 34.6, 31.3, 25.0, 21.5;

**HRMS** Calcd (ESI)  $m/z$  for  $\text{C}_{40}\text{H}_{38}\text{NO}_2\text{S}$   $[\text{M} + \text{H}]^+$ : 596.2618, found: 596.2623.

LHR-1-52-1 #713 RT: 3.18 AV: 1 NL: 2.40E9  
T: FTMS + p ESI Full ms [100.0000-1000.0000]

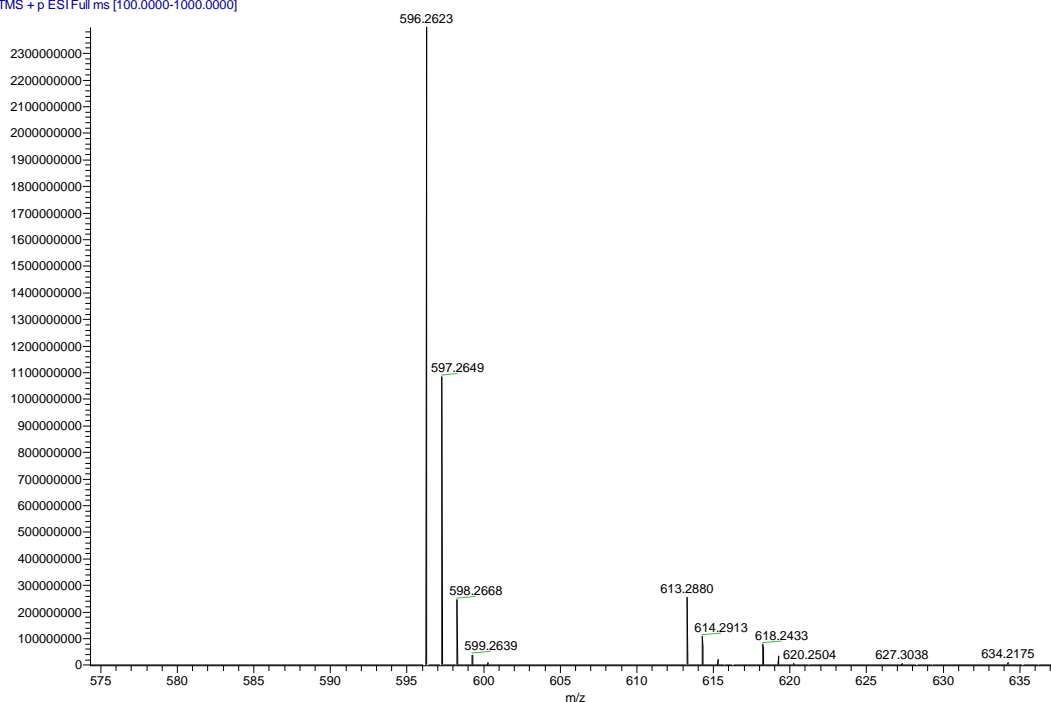

## 2-([1,1'-biphenyl]-4-yl)-3-((9-methyl-9H-fluoren-9-yl)methyl)-1-tosyl-1H-indole

(3e)

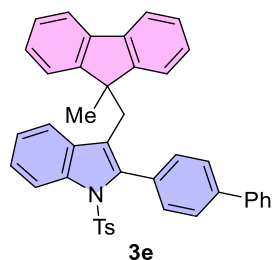

Flash column chromatography on a silica gel (petroleum ether: ethyl acetate, 18: 1) give the product **3e** (106.9 mg, 87% yield) as a yellow solid. Mp: 206-208 °C.

$^1\text{H NMR}$  ( $\text{CDCl}_3$ , 400 MHz)  $\delta$  8.40 (d,  $J = 8.4$  Hz, 1H), 7.72 (d,  $J = 7.2$  Hz, 2H), 7.67 (d,  $J = 7.6$  Hz, 2H), 7.57 (d,  $J = 8.4$  Hz, 2H), 7.52 (t,  $J = 7.6$  Hz, 2H), 7.46-7.36 (m, 4H), 7.34-7.29 (m, 2H), 7.17-7.06 (m, 7H), 7.03 (d,  $J = 7.6$  Hz, 1H), 6.94 (d,  $J = 7.6$  Hz, 2H), 3.03 (s, 2H), 2.35 (s, 3H), 1.41 (s, 3H);

$^{13}\text{C NMR}$  ( $\text{CDCl}_3$ , 100 MHz)  $\delta$  151.7, 144.4, 140.7, 140.4, 139.3, 138.4, 136.8, 135.4, 132.2, 131.2, 130.1, 129.2, 128.7, 127.5, 127.0 (2C), 126.8 (2C), 125.7, 124.5, 123.8, 123.1, 121.1, 120.9, 119.8, 115.5, 51.2, 35.2, 25.2, 21.5;

**HRMS** Calcd (ESI)  $m/z$  for  $C_{42}H_{34}NO_2S$   $[M + H]^+$ : 616.2305, found: 616.2305.

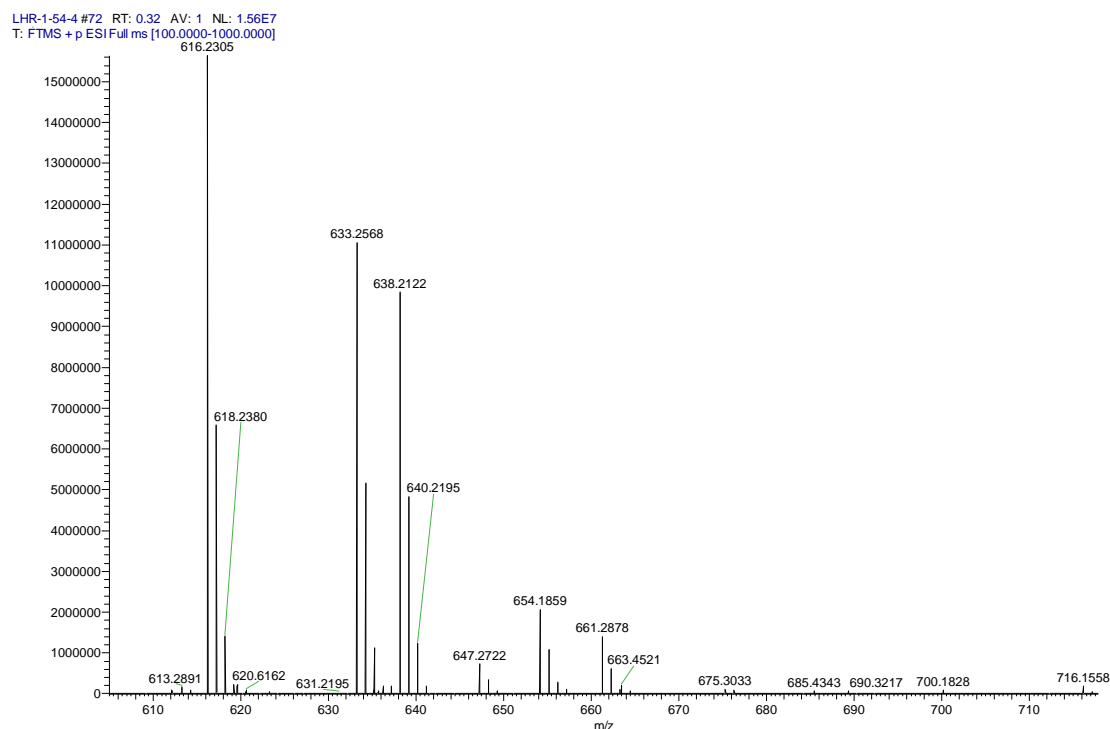

**2-(4-fluorophenyl)-3-((9-methyl-9H-fluoren-9-yl)methyl)-1-tosyl-1H-indole (3f)**

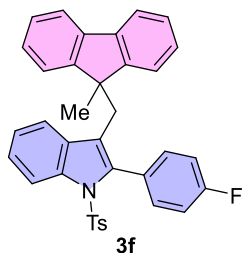

Flash column chromatography on a silica gel (petroleum ether: ethyl acetate, 18: 1) give the product **3f** (109.1 mg, 98% yield) as a yellow solid. Mp: 153-154 °C.

**$^1H$  NMR** ( $CDCl_3$ , 400 MHz)  $\delta$  8.35 (d,  $J = 8.4$  Hz, 1H), 7.65 (d,  $J = 7.6$  Hz, 2H), 7.36-7.32 (m, 1H), 7.31-7.26 (m, 4H), 7.15-7.04 (m, 6H), 6.97-6.85 (m, 6H), 2.92 (s, 2H), 2.35 (s, 3H), 1.40 (s, 3H);

**$^{13}C$  NMR** ( $CDCl_3$ , 100 MHz)  $\delta$  162.6 (d,  $J = 247.3$  Hz), 151.6, 144.5, 139.3, 137.5, 136.7, 135.6, 133.6 (d,  $J = 8.2$  Hz), 130.9, 129.3, 127.1, 126.9 (d,  $J = 3.5$  Hz), 126.8, 126.7, 124.7, 123.7, 123.1, 121.0 (2C), 119.9, 115.4, 114.2 (d,  $J = 21.4$  Hz), 51.2, 35.2, 25.3, 21.5;

**$^{19}F$  NMR** ( $CDCl_3$ , 376 MHz)  $\delta$  -112.7;

**HRMS** Calcd (ESI)  $m/z$  for  $C_{36}H_{29}FNO_2S$   $[M + H]^+$ : 558.1898, found: 558.1896.

LHR-1-52-4 #1218 RT: 5.43 AV: 1 NL: 4.54E5  
T: FTMS + p ESI Full ms [100.0000-1000.0000]

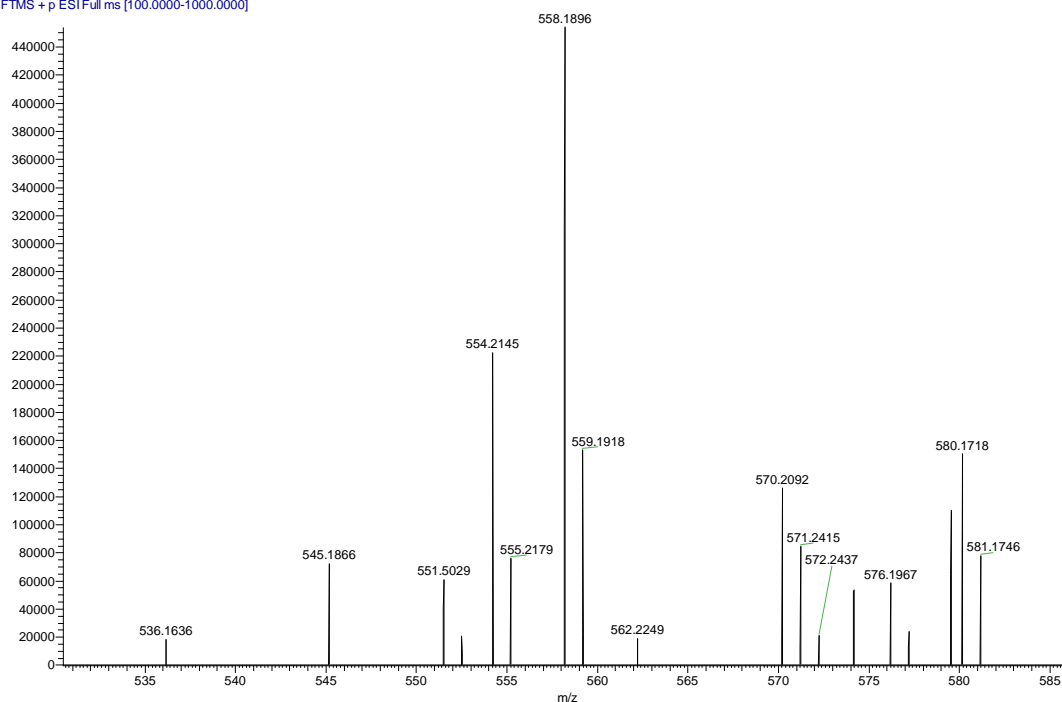

### 2-(4-chlorophenyl)-3-((9-methyl-9H-fluoren-9-yl)methyl)-1-tosyl-1H-indole (**3g**)

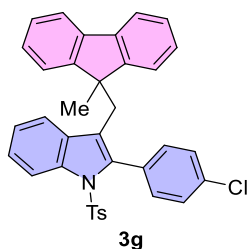

Flash column chromatography on a silica gel (petroleum ether: ethyl acetate, 18: 1) give the product **3g** (100.1 mg, 87% yield) as a yellow solid. Mp: 138-139 °C.

<sup>1</sup>H NMR (CDCl<sub>3</sub>, 400 MHz) δ 8.31 (d, *J* = 8.4 Hz, 1H), 7.63 (d, *J* = 7.6 Hz, 2H), 7.34-7.30 (m, 1H), 7.29-7.25 (m, 4H), 7.20 (d, *J* = 8.4 Hz, 2H), 7.13-7.07 (m, 4H), 7.03 (t, *J* = 7.6 Hz, 2H), 6.86 (d, *J* = 7.6 Hz, 2H), 6.80 (d, *J* = 8.4 Hz, 2H), 2.89 (s, 2H), 2.34 (s, 3H), 1.38 (s, 3H);

<sup>13</sup>C NMR (CDCl<sub>3</sub>, 100 MHz) δ 151.5, 144.6, 139.3, 137.3, 136.8, 135.5, 134.5, 133.0, 131.0, 129.5, 129.4, 127.4, 127.1, 126.8 (2C), 124.8, 123.7, 123.2, 121.3, 121.0, 119.9, 115.5, 51.2, 35.2, 25.4, 21.6;

HRMS Calcd (ESI) m/z for C<sub>36</sub>H<sub>29</sub>ClNO<sub>2</sub>S [M + H]<sup>+</sup>: 574.1602, found: 574.1603.

LHR-1-52-5 #1522 RT: 6.79 AV: 1 NL: 5.60E7  
T: FTMS + p ESI Full ms [100.0000-1000.0000]

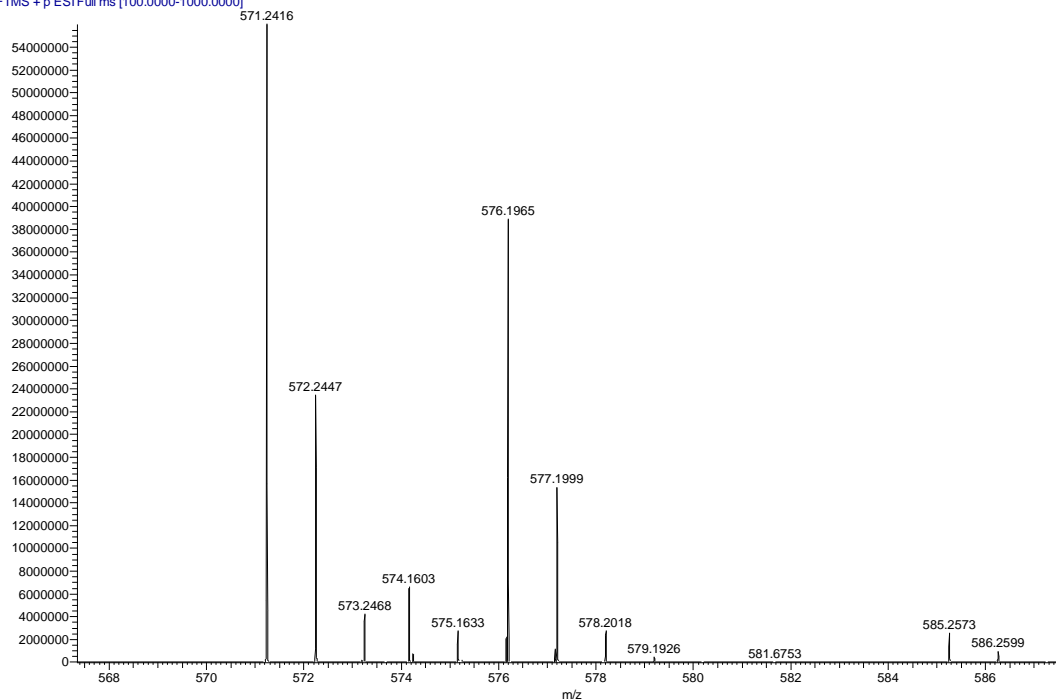

### 3-((9-methyl-9H-fluoren-9-yl)methyl)-1-tosyl-2-(4-(trifluoromethyl)phenyl)-1H-indole (**3h**)

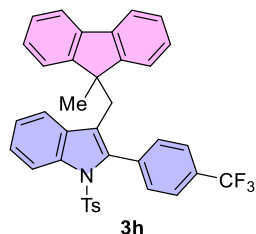

Flash column chromatography on a silica gel (petroleum ether: ethyl acetate, 18: 1) give the product **3h** (110.6 mg, 91% yield) as a yellow soild. Mp: 176-177 °C.

<sup>1</sup>H NMR (CDCl<sub>3</sub>, 400 MHz) δ 8.36 (d, *J* = 8.8 Hz, 1H), 7.65 (d, *J* = 7.6 Hz, 2H), 7.51 (d, *J* = 8.0 Hz, 2H), 7.40-7.36 (m, 1H), 7.32-7.28 (m, 4H), 7.22-7.16 (m, 2H), 7.12 (d, *J* = 7.6 Hz, 2H), 7.07 (t, *J* = 7.6 Hz, 2H), 7.02 (d, *J* = 8.0 Hz, 2H), 6.91 (d, *J* = 7.2 Hz, 2H), 2.97 (s, 2H), 2.35 (s, 3H), 1.44 (s, 3H);

<sup>13</sup>C NMR (CDCl<sub>3</sub>, 100 MHz) δ 151.4, 144.7, 139.3, 136.9 (2C), 135.2, 134.9, 131.9, 131.0, 130.0 (q, *J* = 32.2 Hz), 129.4, 127.1, 126.8, 126.7, 125.0, 124.1 (q, *J* = 270.7 Hz), 124.0 (q, *J* = 3.6 Hz), 123.6, 123.4, 122.0, 121.1, 119.9, 115.6, 51.2, 35.2, 25.4, 21.5;

<sup>19</sup>F NMR (CDCl<sub>3</sub>, 376 MHz) δ -62.5;

HRMS Calcd (ESI) m/z for C<sub>37</sub>H<sub>29</sub>F<sub>3</sub>NO<sub>2</sub>S [M + H]<sup>+</sup>: 608.1866, found: 608.1873.

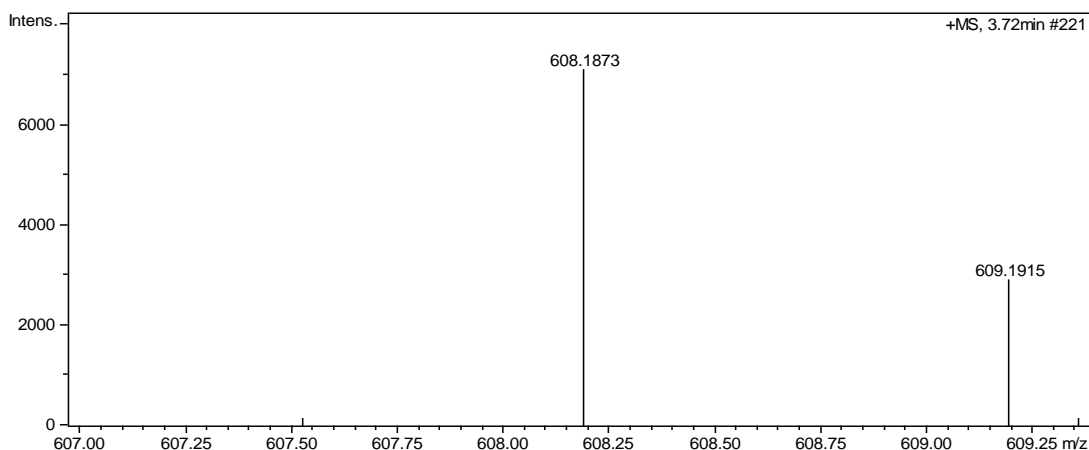

### 3-((9-methyl-9H-fluoren-9-yl)methyl)-2-(p-tolyl)-1-tosyl-1H-indole (**3i**)

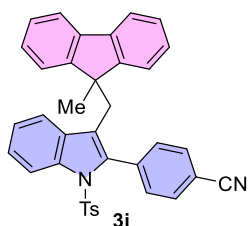

Flash column chromatography on a silica gel (petroleum ether: ethyl acetate, 18: 1) give the product **3i** (70.1 mg, 62% yield) as a white soild. Mp: 198-199 °C.

**<sup>1</sup>H NMR** (CDCl<sub>3</sub>, 400 MHz) δ 8.33 (d, *J* = 8.4 Hz, 1H), 7.65 (d, *J* = 7.6 Hz, 2H), 7.50 (d, *J* = 8.0 Hz, 2H), 7.40 (t, *J* = 7.2 Hz, 1H), 7.32-7.28 (m, 5H), 7.23-7.19 (m, 1H), 7.14 (d, *J* = 8.4 Hz, 2H), 7.06 (t, *J* = 7.6 Hz, 2H), 6.95 (d, *J* = 8.0 Hz, 2H), 6.88 (d, *J* = 7.6 Hz, 2H), 2.93 (s, 2H), 2.37 (s, 3H), 1.46 (s, 3H);

**<sup>13</sup>C NMR** (CDCl<sub>3</sub>, 100 MHz) δ 151.3, 144.9, 139.3, 137.0, 136.4, 136.0, 135.0, 132.1, 130.9, 130.8, 129.5, 127.2, 126.9, 126.7, 125.3, 123.6 (2C), 122.5, 121.2, 120.0, 118.7, 115.6, 111.8, 51.2, 35.2, 25.5, 21.6;

**HRMS** Calcd (ESI) *m/z* for C<sub>37</sub>H<sub>29</sub>N<sub>2</sub>O<sub>2</sub>S [M + H]<sup>+</sup>: 556.1944, found: 556.1944.

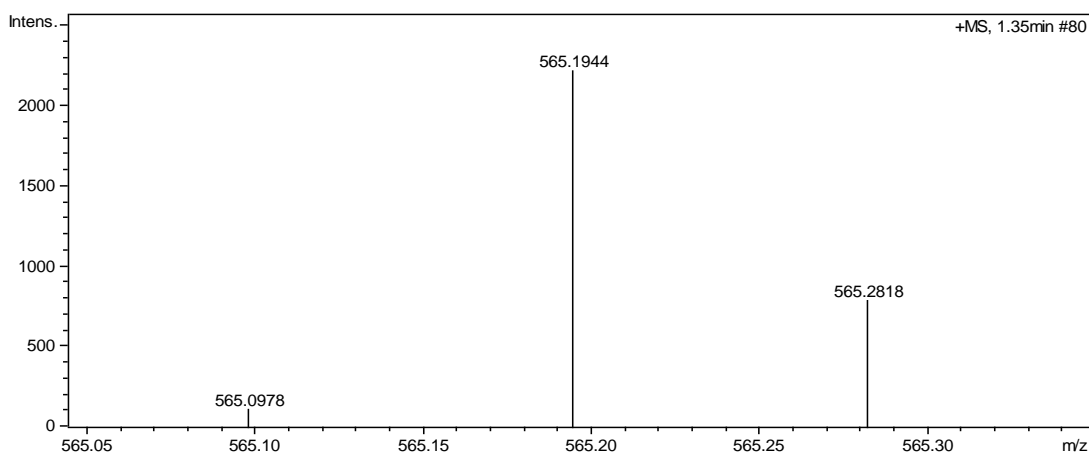

### 3-((9-methyl-9H-fluoren-9-yl)methyl)-2-(m-tolyl)-1-tosyl-1H-indole (3j)

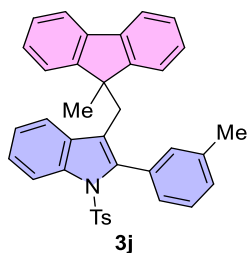

Flash column chromatography on a silica gel (petroleum ether: ethyl acetate, 18: 1) give the product **3j** (107.4 mg, 97% yield) as a yellow solid. Mp: 167-168 °C.

**<sup>1</sup>H NMR** (CDCl<sub>3</sub>, 400 MHz) δ 8.36 (d, *J* = 8.4 Hz, 1H), 7.66 (d, *J* = 7.2 Hz, 2H), 7.35-7.28 (m, 5H), 7.20-7.15 (m, 2H), 7.13-7.07 (m, 5H), 7.03 (t, *J* = 7.6 Hz, 1H), 6.97 (d, *J* = 7.6 Hz, 1H), 6.84 (d, *J* = 7.2 Hz, 2H), 6.57 (s, 1H), 2.99 (d, *J* = 14.4 Hz, 1H), 2.86 (d, *J* = 14.4 Hz, 1H), 2.36 (s, 3H), 2.27 (s, 3H), 1.41 (s, 3H);

**<sup>13</sup>C NMR** (CDCl<sub>3</sub>, 100 MHz) δ 152.1, 151.6, 144.3, 139.4, 139.2, 138.9, 136.7, 136.4, 135.7, 132.4, 131.1, 130.8, 129.2, 129.1, 128.9, 127.0, 126.9, 126.8, 126.7, 124.4, 124.1, 123.6, 123.0, 120.9, 120.7, 119.8, 115.4, 51.2, 35.2, 25.4, 21.5, 21.3;

**HRMS** Calcd (ESI) *m/z* for C<sub>37</sub>H<sub>32</sub>NO<sub>2</sub>S [M + H]<sup>+</sup>: 554.2148, found: 554.2148.

LHR-1-52-3 #525 RT: 2.34 AV: 1 NL: 9.38E6  
T: FTMS + p ESI Full ms [100.0000-1000.0000]

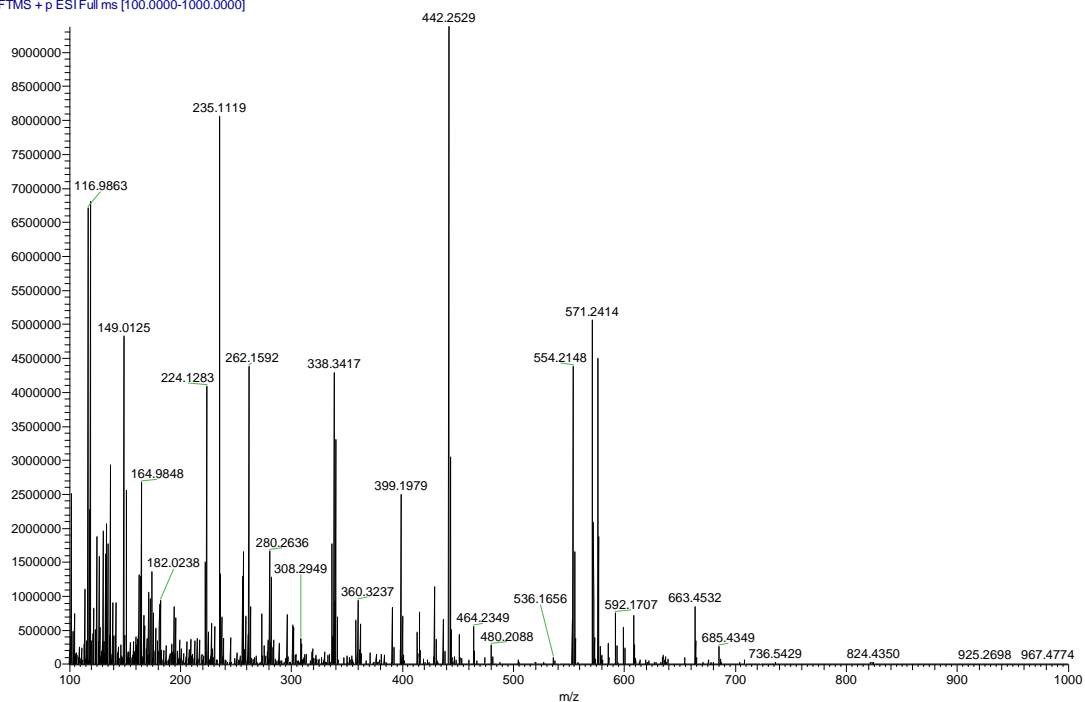

### 3-((9-methyl-9H-fluoren-9-yl)methyl)-2-(o-tolyl)-1-tosyl-1H-indole (3k)

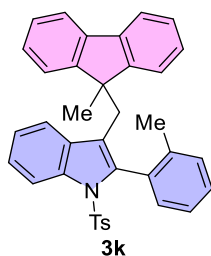

Flash column chromatography on a silica gel (petroleum ether: ethyl acetate, 18: 1) give the product **3k** (106.9 mg, 96% yield) as a yellow solid. Mp: 178-179 °C.

**<sup>1</sup>H NMR** (CDCl<sub>3</sub>, 400 MHz) δ 8.32 (d, *J* = 8.4 Hz, 1H), 7.65-7.61 (m, 2H), 7.33-7.29 (m, 3H), 7.27-7.22 (m, 3H), 7.19 (d, *J* = 7.6 Hz, 1H), 7.14-7.11 (m, 3H), 7.08 (d, *J* = 8.0 Hz, 2H), 7.03-6.99 (m, 1H), 6.90-6.86 (m, 1H), 6.81 (d, *J* = 7.6 Hz, 1H), 6.69 (d, *J* = 7.2 Hz, 1H), 6.65 (d, *J* = 7.6 Hz, 1H), 3.18 (d, *J* = 14.0 Hz, 1H), 2.51 (d, *J* = 14.0 Hz, 1H), 2.32 (s, 3H), 1.97 (s, 3H), 1.26 (s, 3H);

**<sup>13</sup>C NMR** (CDCl<sub>3</sub>, 100 MHz) δ 152.5, 151.0, 144.4, 140.0, 139.6, 139.1, 137.7, 136.4, 135.9, 131.7, 131.0, 130.6, 129.6, 129.3, 129.0, 127.0 (2C), 126.9, 126.8, 126.7, 124.5, 124.3 (2C), 123.4, 122.7, 121.0, 120.2, 119.8 (2C), 115.0, 51.1, 35.2, 24.9, 21.5, 20.3;

**HRMS** Calcd (ESI) *m/z* for C<sub>37</sub>H<sub>32</sub>NO<sub>2</sub>S [M + H]<sup>+</sup>: 554.2148, found: 554.2147.

LHR-1-52-2 #1597 RT: 7.13 AV: 1 NL: 5.71E6  
T: FTMS + p ESIFull ms [100.0000-1000.0000]

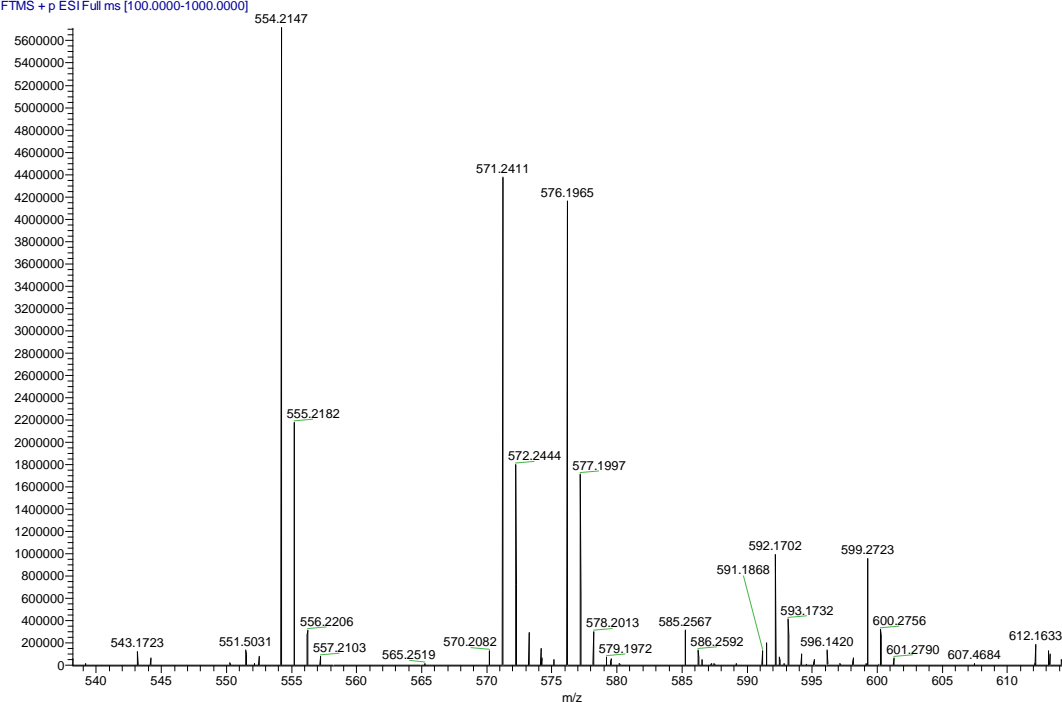

**3-((9-methyl-9H-fluoren-9-yl)methyl)-2-(thiophen-2-yl)-1-tosyl-1H-indole (3l)**

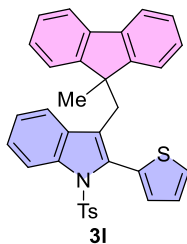

Flash column chromatography on a silica gel (petroleum ether: ethyl acetate, 18: 1) give the product **3I** (102.4 mg, 94% yield) as a brown solid. Mp: 132-133 °C.

<sup>1</sup>H NMR (CDCl<sub>3</sub>, 400 MHz) δ 8.36 (d, *J* = 8.4 Hz, 1H), 7.68 (d, *J* = 7.6 Hz, 2H), 7.44 (d, *J* = 8.4 Hz, 2H), 7.39-7.38 (m, 1H), 7.37-7.33 (m, 1H), 7.32-7.28 (m, 2H), 7.16 (d, *J* = 8.0 Hz, 2H), 7.12 (t, *J* = 8.0 Hz, 1H), 7.07-7.02 (m, 3H), 6.98-6.96 (m, 1H), 6.89 (d, *J* = 7.6 Hz, 2H), 6.61 (d, *J* = 2.8 Hz, 1H), 2.99 (s, 2H), 2.36 (s, 3H), 1.46 (s, 3H);

<sup>13</sup>C NMR (CDCl<sub>3</sub>, 100 MHz) δ 151.7, 144.5, 139.3, 137.2, 135.5, 131.7, 131.0 (2C), 130.8, 129.3, 128.0, 127.1, 126.9, 126.8, 126.2, 125.1, 123.8, 123.7, 123.2, 121.1, 119.9, 115.5, 51.0, 35.5, 25.2, 21.6;

HRMS Calcd (ESI) *m/z* for C<sub>34</sub>H<sub>28</sub>NO<sub>2</sub>S<sub>2</sub> [M + H]<sup>+</sup>: 546.1556, found: 546.1555.

LHR-1-54-2 #1254 RT: 5.60 AV: 1 NL: 1.51E7  
T: FTMS + p ESI Full ms [100.0000-1000.0000]

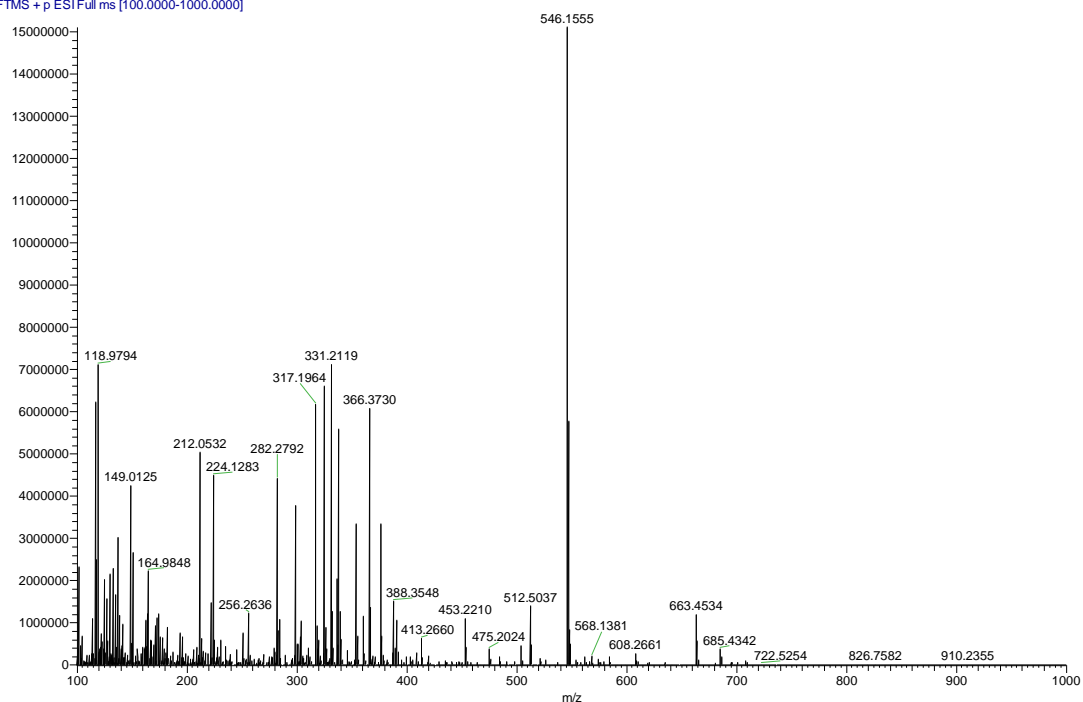

**2-cyclopropyl-3-((9-methyl-9H-fluoren-9-yl)methyl)-1-tosyl-1H-indole (3m)**

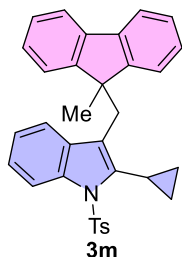

Flash column chromatography on a silica gel (petroleum ether: ethyl acetate, 18: 1) give the product **3m** (90.8 mg, 90% yield) as a yellow solid. Mp: 150-151 °C.

<sup>1</sup>H NMR (CDCl<sub>3</sub>, 400 MHz) δ 8.15 (d, *J* = 8.4 Hz, 1H), 7.64-7.61 (m, 4H), 7.26-7.18 (m, 5H), 6.98-6.93 (m, 3H), 6.73 (d, *J* = 6.4 Hz, 2H), 6.67 (d, *J* = 8.0 Hz, 1H), 3.04 (s, 2H), 2.32 (s, 3H), 1.80-1.73 (m, 1H), 1.48 (s, 3H), 1.05-1.01 (m, 2H), 0.68-0.64 (m, 2H);

<sup>13</sup>C NMR (CDCl<sub>3</sub>, 100 MHz) δ 151.5, 144.5, 139.6, 139.3, 136.7, 135.7, 132.2, 129.4, 127.0, 126.6 (2C), 124.3, 123.8, 123.1, 122.5, 119.8, 119.7, 115.5, 51.4, 35.0, 23.8, 21.6, 9.8, 9.3;

HRMS Calcd (ESI) *m/z* for C<sub>33</sub>H<sub>30</sub>NO<sub>2</sub>S [M + H]<sup>+</sup>: 504.1992, found: 504.1992.

LHR-1-52-7 #1018 RT: 4.54 AV: 1 NL: 1.09E7  
T: FTMS + p ESIFull ms [100.0000-1000.0000]

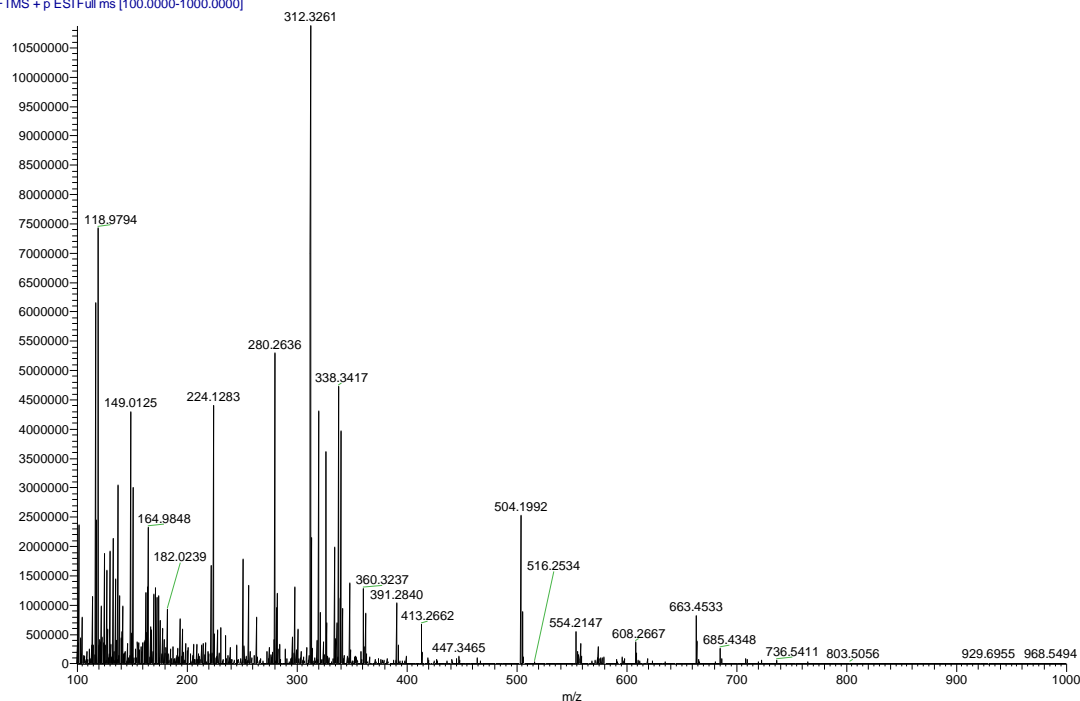

**2-butyl-3-((9-methyl-9H-fluoren-9-yl)methyl)-1-tosyl-1H-indole (3n)**

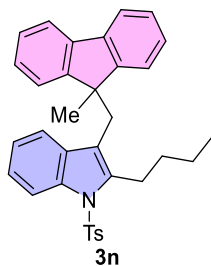

Flash column chromatography on a silica gel (petroleum ether: ethyl acetate, 18: 1) give the product **3n** (76.4 mg, 74% yield) as a yellow solid. Mp: 162-163 °C.

**<sup>1</sup>H NMR** (CDCl<sub>3</sub>, 400 MHz) δ 8.23 (d, *J* = 8.4 Hz, 1H), 7.68 (d, *J* = 7.6 Hz, 2H), 7.63 (d, *J* = 8.0 Hz, 2H), 7.28 (t, *J* = 7.6 Hz, 2H), 7.25-7.21 (m, 3H), 7.08 (t, *J* = 7.6 Hz, 1H), 7.00-6.96 (m, 3H), 6.75 (d, *J* = 7.6 Hz, 2H), 2.88 (s, 2H), 2.56 (t, *J* = 7.6 Hz, 2H), 2.35 (s, 3H), 1.54-1.50 (m, 2H), 1.43 (s, 3H), 1.22-1.13 (m, 2H), 0.79 (t, *J* = 7.2 Hz, 3H);

**<sup>13</sup>C NMR** (CDCl<sub>3</sub>, 100 MHz) δ 151.5, 144.7, 140.3, 139.2, 137.0, 135.7, 132.3, 129.6, 127.1, 126.7, 126.4, 123.8, 123.6, 123.3, 119.9, 119.8, 119.1, 115.6, 50.9, 35.0, 32.5, 27.2, 23.8, 22.4, 21.6, 13.8;

**HRMS** Calcd (ESI) *m/z* for C<sub>34</sub>H<sub>34</sub>NO<sub>2</sub>S [M + H]<sup>+</sup>: 520.2305, found: 520.2307.

LHR-1-54-1 #1550 RT: 6.91 AV: 1 NL: 3.21E5  
T: FTMS + p ESI Full ms [100.0000-1000.0000]

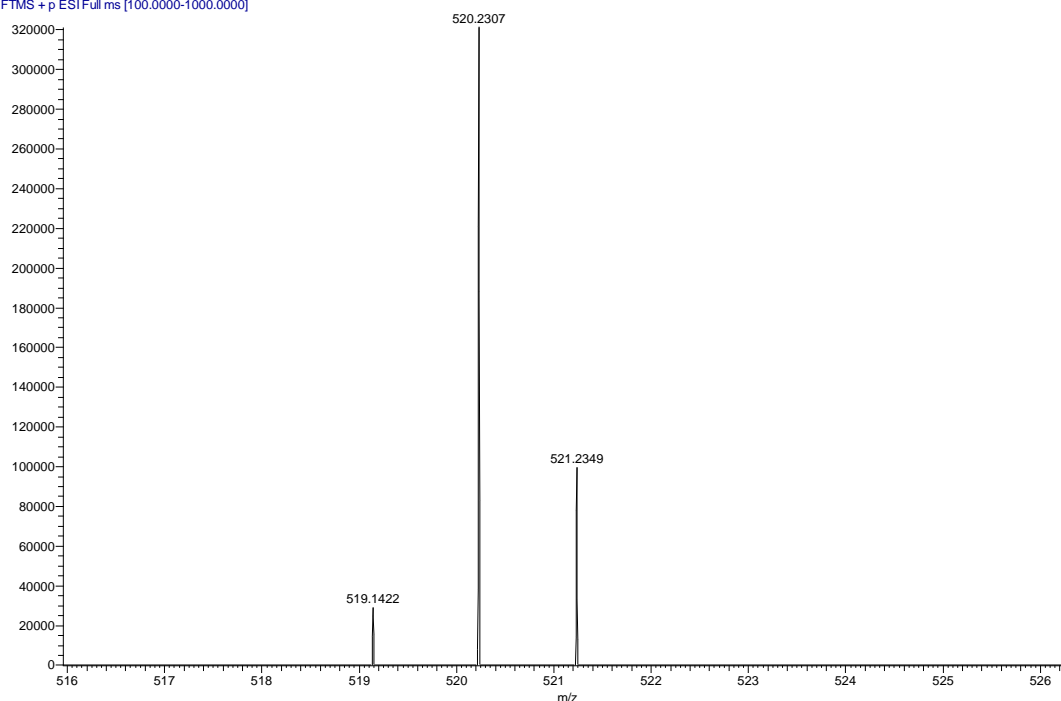

**2-butyl-6-methyl-3-((9-methyl-9H-fluoren-9-yl)methyl)-1-tosyl-1H-indole (3o)**

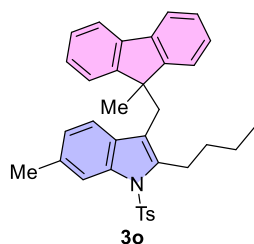

Flash column chromatography on a silica gel (petroleum ether: ethyl acetate, 18: 1) give the product **3o** (88.8 mg, 83% yield) as a yellow solid. Mp: 138-139 °C.

<sup>1</sup>H NMR (CDCl<sub>3</sub>, 400 MHz) δ 8.08 (d, *J* = 8.4 Hz, 1H), 7.67 (d, *J* = 7.2 Hz, 2H), 7.61 (d, *J* = 8.4 Hz, 2H), 7.30-7.26 (m, 2H), 7.23-7.21 (m, 2H), 7.04-7.02 (m, 1H), 7.00-6.96 (m, 2H), 6.76 (d, *J* = 7.6 Hz, 2H), 6.69 (s, 1H), 2.85 (s, 2H), 2.56 (t, *J* = 7.2 Hz, 2H), 2.34 (s, 3H), 2.27 (s, 3H), 1.56-1.48 (m, 2H), 1.43 (s, 3H), 1.22-1.12 (m, 2H), 0.79 (t, *J* = 7.2 Hz, 3H);

<sup>13</sup>C NMR (CDCl<sub>3</sub>, 100 MHz) δ 151.5, 144.5, 140.3, 139.3, 135.6, 135.2, 132.8, 132.5, 129.5, 127.1, 126.6, 126.4, 125.1, 123.6, 120.0, 119.8, 119.1, 115.2, 50.9, 35.2, 32.5, 27.2, 23.7, 22.4, 21.6, 21.2, 13.8;

HRMS Calcd (ESI) *m/z* for C<sub>35</sub>H<sub>36</sub>NO<sub>2</sub>S [M + H]<sup>+</sup>: 534.2461, found: 534.2460.

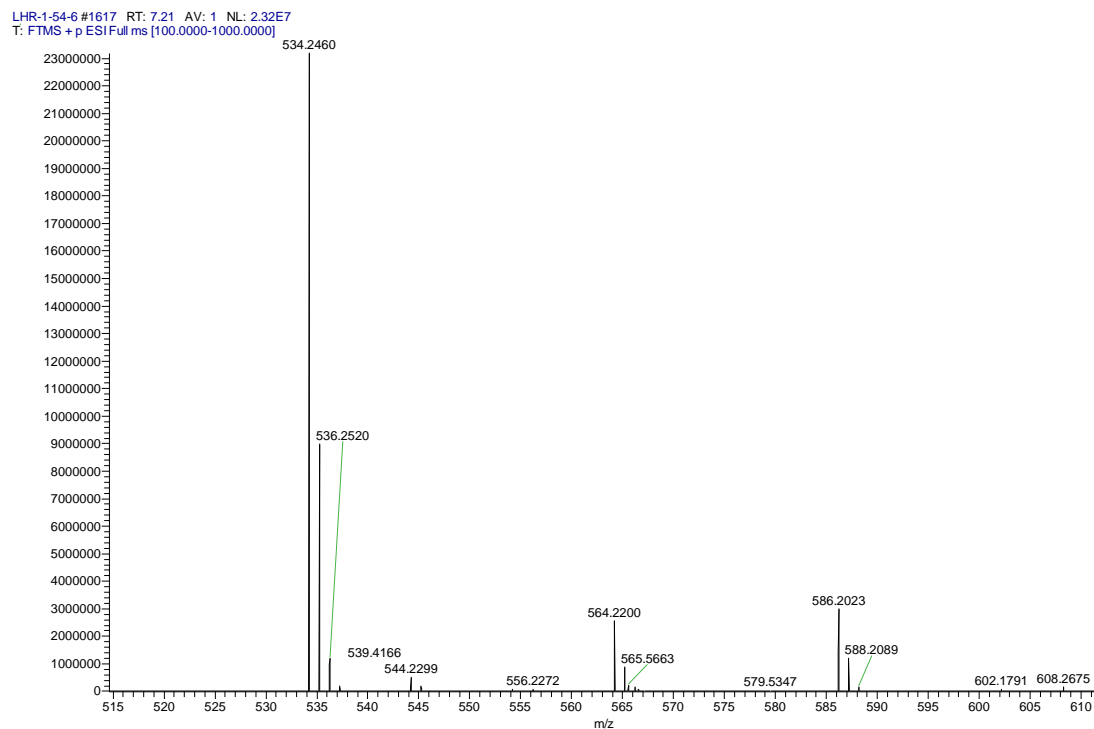

**2-butyl-6-chloro-3-((9-methyl-9H-fluoren-9-yl)methyl)-1-tosyl-1H-indole (3p)**

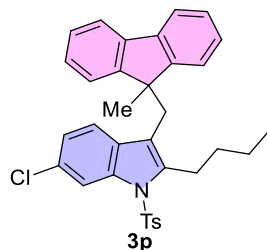

Flash column chromatography on a silica gel (petroleum ether: ethyl acetate, 18: 1) give the product **3p** (88.7 mg, 80 % yield) as a yellow solid. Mp: 141-142 °C.

<sup>1</sup>H NMR (CDCl<sub>3</sub>, 400 MHz) δ 8.10 (d, *J* = 8.8 Hz, 1H), 7.65 (d, *J* = 7.6 Hz, 2H), 7.56 (d, *J* = 8.0 Hz, 2H), 7.30-7.27 (m, 2H), 7.26-7.24 (m, 2H), 7.15 (dd, *J*<sub>1</sub> = 8.8 Hz, *J*<sub>2</sub> = 2.0 Hz, 1H), 7.03-6.99 (m, 2H), 6.86 (s, 1H), 6.81 (d, *J* = 7.6 Hz, 2H), 2.87 (s, 2H), 2.54 (t, *J* = 7.6 Hz, 2H), 2.38 (s, 3H), 1.52-1.49 (m, 2H), 1.46 (s, 3H), 1.21-1.16 (m, 2H), 0.80 (t, *J* = 7.2 Hz, 3H);

<sup>13</sup>C NMR (CDCl<sub>3</sub>, 100 MHz) δ 151.2, 144.9, 141.8, 139.3, 135.5, 135.2, 133.5, 129.7, 129.1, 127.3, 126.7, 126.4, 123.8, 123.5, 112.0, 119.5, 118.3, 116.4, 50.9, 35.3, 32.5, 27.2, 23.9, 22.4, 21.6, 13.7;

**HRMS** Calcd (ESI) *m/z* for C<sub>34</sub>H<sub>33</sub>ClNO<sub>2</sub>S [M + H]<sup>+</sup>: 554.1915, found: 554.1915.

LHR-1-153-1 #1508 RT: 6.73 AV: 1 NL: 9.48E5  
T: FTMS + p ESI Full ms [100.0000-1000.0000]

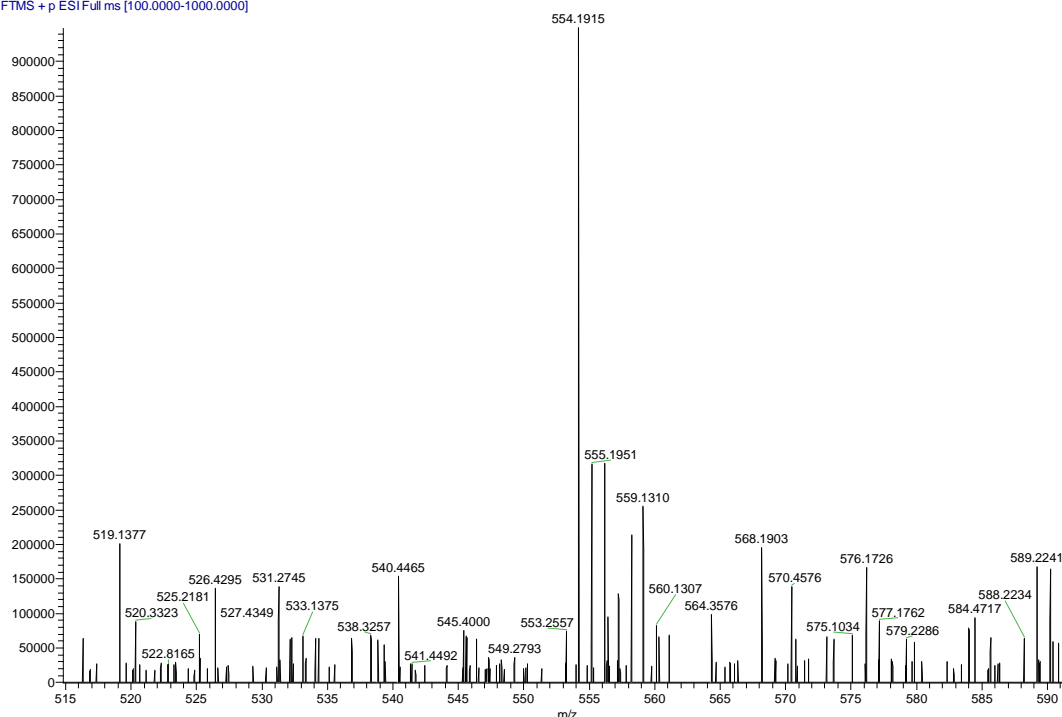

**3-((3,9-dimethyl-9H-fluoren-9-yl)methyl)-2-phenyl-1-tosyl-1H-indole (3q)**

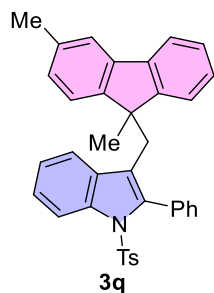

Flash column chromatography on a silica gel (petroleum ether: ethyl acetate, 18: 1) give the product **3q** (77.6 mg, 70 % yield) as a yellow solid. Mp: 171-172 °C.

$^1\text{H NMR}$  ( $\text{CDCl}_3$ , 400 MHz)  $\delta$  8.31 (d,  $J = 8.4$  Hz, 1H), 7.59 (d,  $J = 7.6$  Hz, 1H), 7.44 (s, 1H), 7.35-7.27 (m, 5H), 7.25-7.22 (m, 2H), 7.08-6.98 (m, 6H), 6.92 (d,  $J = 8.0$  Hz, 1H), 6.84-6.82 (m, 2H), 6.75-6.73 (m, 1H), 2.89 (s, 2H), 2.38 (s, 3H), 2.32 (s, 3H), 1.27 (s, 3H);

$^{13}\text{C NMR}$  ( $\text{CDCl}_3$ , 100 MHz)  $\delta$  152.1, 149.1, 144.4, 139.4, 139.3, 138.6, 136.7, 136.6, 135.6, 131.9, 131.2, 131.1, 129.2, 128.4, 127.6, 127.1, 126.9, 126.8, 126.6, 124.5, 123.9, 123.50, 123.0, 121.0, 120.9, 120.4, 119.7, 115.4, 50.9, 35.2, 25.2, 21.6, 21.5;

**HRMS** Calcd (ESI)  $m/z$  for  $\text{C}_{37}\text{H}_{32}\text{NO}_2\text{S}$   $[\text{M} + \text{H}]^+$ : 554.2148, found: 554.2153.

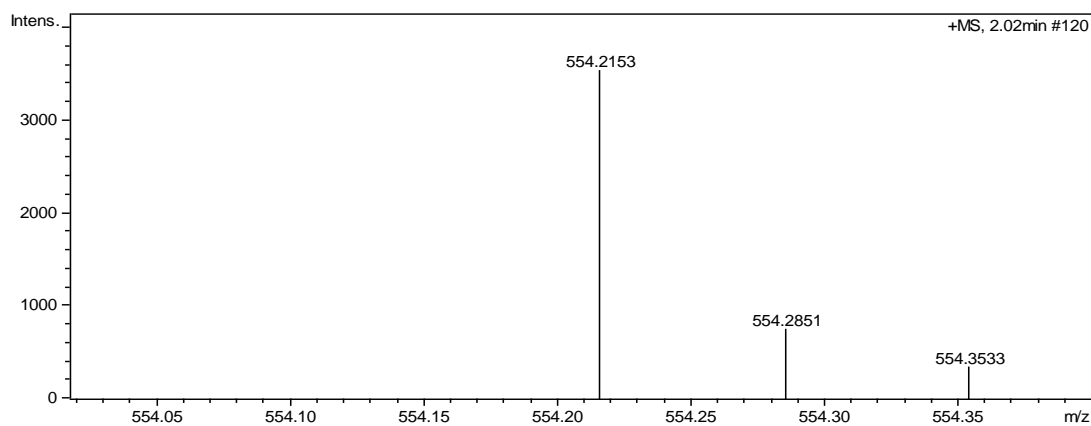

### 3-((2-methoxy-9-methyl-9H-fluoren-9-yl)methyl)-2-phenyl-1-tosyl-1H-indole (**3r**)

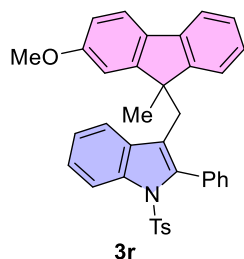

Flash column chromatography on a silica gel (petroleum ether: ethyl acetate, 10: 1) give the product **3r** (110.5 mg, 97% yield) as a yellow solid. Mp: 110-111 °C.

$^1\text{H NMR}$  ( $\text{CDCl}_3$ , 600 MHz)  $\delta$  8.31 (d,  $J = 8.4$  Hz, 1H), 7.55-7.52 (m, 2H), 7.42-7.33 (m, 3H), 7.30-7.28 (m, 3H), 7.25 -7.23 (m, 1H), 7.17-7.11 (m, 2H), 7.08-7.03 (m, 3H), 6.98 (t,  $J = 7.8$  Hz 1H), 6.84-6.79 (m, 3H), 6.36 (s, 3H), 3.52 (s, 3H), 2.96 (d,  $J = 14.4$  Hz, 1H), 2.87 (d,  $J = 14.4$  Hz, 1H), 2.31 (s, 3H), 1.20 (s, 3H);

$^{13}\text{C NMR}$  ( $\text{CDCl}_3$ , 150 MHz)  $\delta$  159.0, 153.4, 151.4, 144.4, 139.3, 138.8, 136.5, 135.5, 132.2, 132.0, 131.9, 131.3, 131.2, 129.3, 128.5, 127.3, 127.0, 126.8, 125.6, 124.5, 123.6, 123.0, 121.0, 120.5, 119.0, 115.4, 113.3, 109.6, 55.1, 51.2, 35.1, 24.7, 21.5;

**HRMS** Calcd (ESI)  $m/z$  for  $\text{C}_{37}\text{H}_{31}\text{NNaO}_3\text{S}$   $[\text{M} + \text{Na}]^+$ : 592.1917, found: 592.1926.

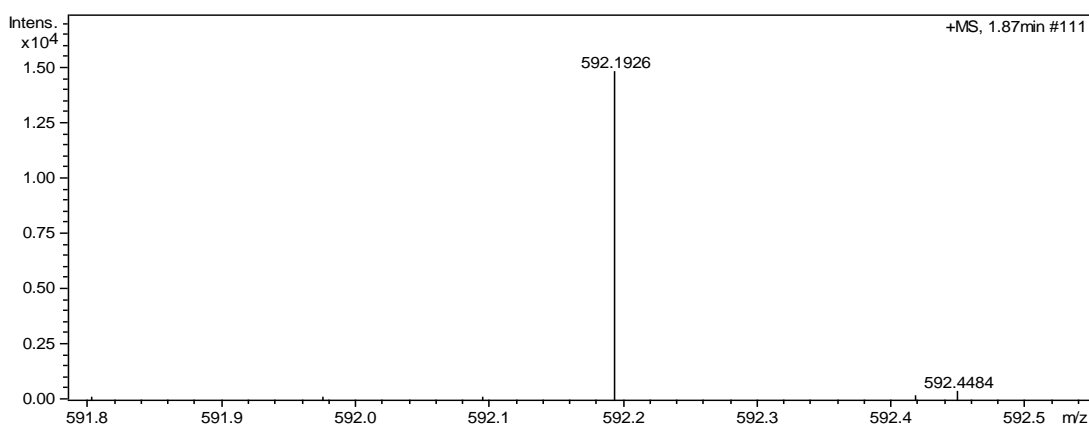

### 3-((3-fluoro-9-methyl-9H-fluoren-9-yl)methyl)-2-phenyl-1-tosyl-1H-indole (**3s**)

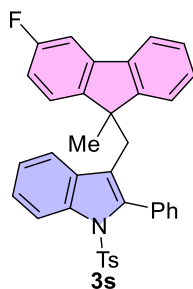

Flash column chromatography on a silica gel (petroleum ether: ethyl acetate, 18: 1) give the product **3s** (105.3 mg, 94% yield) as a yellow solid. Mp: 119-120 °C.

$^1\text{H NMR}$  ( $\text{CDCl}_3$ , 400 MHz)  $\delta$  8.31 (d,  $J = 8.4$  Hz, 1H), 7.56 (d,  $J = 7.2$  Hz, 1H), 7.39-7.35 (m, 1H), 7.32-7.24 (m, 1H), 7.30-7.29 (m, 1H), 7.28-7.24 (m, 5H), 7.09-7.04 (m, 5H), 7.00-6.98 (m, 1H), 6.92-6.87 (m, 2H), 6.72-6.63 (m, 2H), 2.92 (q,  $J = 14.0$  Hz, 2H), 2.31 (s, 3H), 1.27 (s, 3H);

$^{13}\text{C}$  NMR ( $\text{CDCl}_3$ , 100 MHz)  $\delta$  162.6 (d,  $J = 242.3$  Hz), 152.7, 146.9, 144.4, 141.3 (d,  $J = 8.8$  Hz), 138.7, 138.3 (d,  $J = 3.1$  Hz), 136.7, 135.5, 132.1, 131.8, 131.0 (d,  $J = 2.9$  Hz), 129.3, 128.5, 127.4, 127.2, 127.1, 126.8, 124.9 (d,  $J = 8.8$  Hz), 124.6, 123.8, 123.1, 120.8, 120.5, 120.0, 115.5, 113.4 (d,  $J = 22.6$  Hz), 106.7 (d,  $J = 22.8$  Hz), 50.8, 35.0, 25.2, 21.5;

$^{19}\text{F}$  NMR ( $\text{CDCl}_3$ , 376 MHz)  $\delta$  -116.0;

HRMS Calcd (ESI)  $m/z$  for  $\text{C}_{36}\text{H}_{28}\text{FNNaO}_2\text{S}$   $[\text{M} + \text{Na}]^+$ : 580.1717, found: 580.1726.

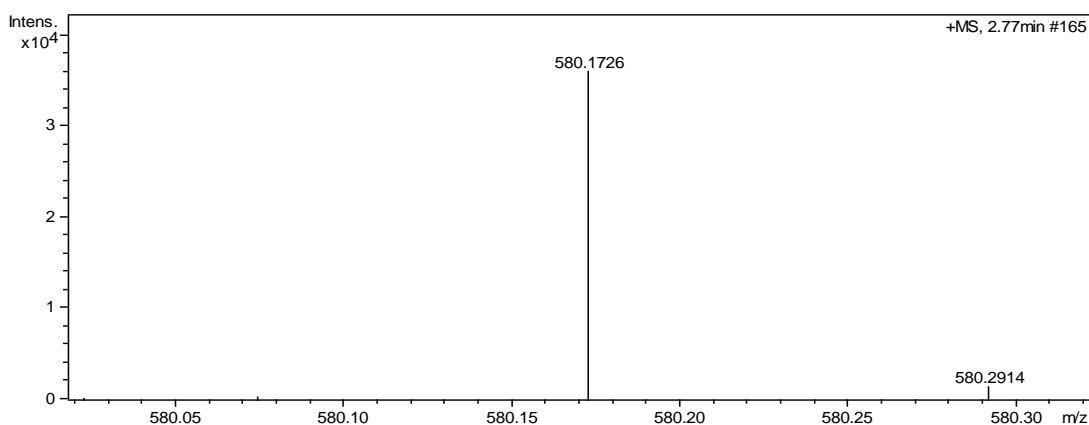

### 3-((2-chloro-9-methyl-9H-fluoren-9-yl)methyl)-2-phenyl-1-tosyl-1H-indole (3t)

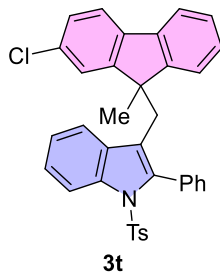

Flash column chromatography on a silica gel (petroleum ether: ethyl acetate, 18: 1) give the product **3t** (79.8 mg, 70% yield) as a yellow solid. Mp: 120-121 °C.

$^1\text{H}$  NMR ( $\text{CDCl}_3$ , 400 MHz)  $\delta$  8.29 (d,  $J = 8.4$  Hz, 1H), 7.55 (d,  $J = 7.6$  Hz, 1H), 7.48 (d,  $J = 8.0$  Hz, 1H), 7.41-7.37 (m, 1H), 7.34 (t,  $J = 6.4$  Hz, 2H), 7.29-7.24 (m, 4H), 7.21-7.16 (m, 2H), 7.06-7.00 (m, 5H), 6.88 (d,  $J = 7.6$  Hz, 1H), 6.84 (s, 1H), 6.77 (d,  $J = 8.0$  Hz, 1H), 2.97 (q,  $J = 12.0$  Hz, 2H), 2.30 (s, 3H), 1.26 (s, 3H);

$^{13}\text{C}$  NMR ( $\text{CDCl}_3$ , 100 MHz)  $\delta$  153.4, 151.4, 144.4, 138.8, 138.4, 137.8, 136.6, 135.5, 132.4, 132.1, 132.0, 131.0, 130.9, 129.3, 128.5, 127.3, 127.2, 127.1, 126.8, 124.6, 124.4, 123.9, 123.0, 120.7 (2C), 120.0, 119.8, 115.5, 51.4, 35.0, 24.9, 21.5;

HRMS Calcd (ESI)  $m/z$  for  $\text{C}_{36}\text{H}_{28}\text{ClNNaO}_2\text{S}$   $[\text{M} + \text{Na}]^+$ : 596.1421, found: 596.1428.

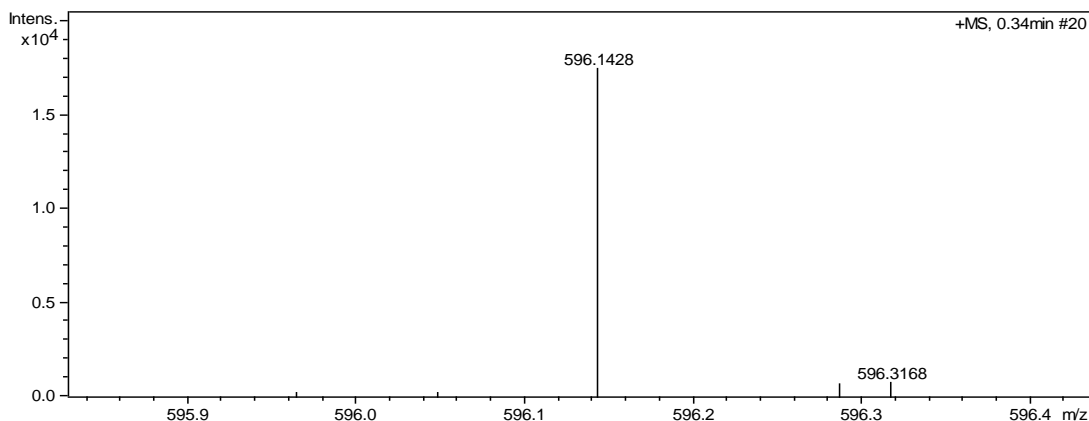

### 3-((9-methyl-9H-fluoren-9-yl)methyl)-2-phenylbenzofuran (**5a**)

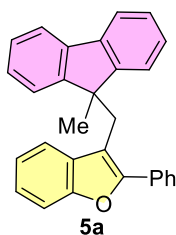

Flash column chromatography on a silica gel (petroleum ether: ethyl acetate, 100: 1) give the product **5a** (60.6 mg, 78% yield) as a yellow solid. Mp: 104-105 °C.

<sup>1</sup>H NMR (CDCl<sub>3</sub>, 400 MHz) δ 7.67 (d, *J* = 7.6 Hz, 2H), 7.46 (d, *J* = 8.4 Hz, 1H), 7.34 (d, *J* = 7.6 Hz, 1H), 7.27-7.23 (m, 8H), 7.18-7.12 (m, 3H), 7.08 (t, *J* = 7.6 Hz, 2H), 3.35 (s, 2H), 1.61 (s, 3H);

<sup>13</sup>C NMR (CDCl<sub>3</sub>, 100 MHz) δ 153.7, 152.9, 151.4, 139.4, 131.2, 130.8, 128.2, 127.9, 127.2 (2C), 127.0, 124.0, 123.8, 122.0, 121.0, 119.8, 113.3, 110.8, 51.5, 35.0, 25.1;

HRMS Calcd (ESI) m/z for C<sub>29</sub>H<sub>23</sub>O [M + H]<sup>+</sup>: 387.1743, found: 387.1751.

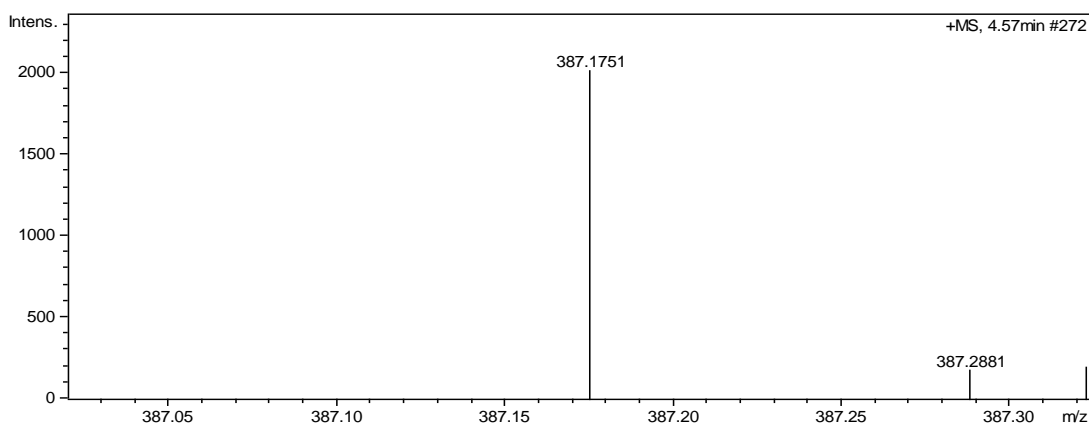

### 3-((9-methyl-9H-fluoren-9-yl)methyl)-2-(p-tolyl)benzofuran (**5b**)

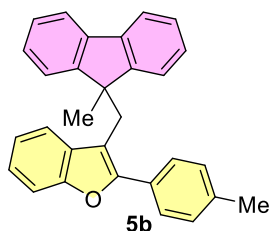

Flash column chromatography on a silica gel (petroleum ether: ethyl acetate, 100: 1) give the product **5b** (71.2 mg, 89% yield) as a yellow solid. Mp: 106-107 °C.

<sup>1</sup>H NMR (CDCl<sub>3</sub>, 400 MHz) δ 7.68 (d, *J* = 7.6 Hz, 2H), 7.45 (d, *J* = 8.0 Hz, 1H), 7.31 (d, *J* = 8.0 Hz, 1H), 7.28-7.24 (m, 2H), 7.23-7.21 (m, 1H), 7.17-7.14 (m, 4H), 7.12-7.06 (m, 3H), 7.03 (d, *J* = 8.0 Hz, 2H), 3.32 (s, 2H), 2.31 (s, 3H), 1.61 (s, 3H);

<sup>13</sup>C NMR (CDCl<sub>3</sub>, 100 MHz) δ 153.7, 153.3, 151.5, 139.4, 137.8, 130.9, 128.9, 128.4, 127.1 (2C), 127.0, 123.9, 123.8, 122.0, 120.9, 119.8, 112.7, 110.7, 51.5, 35.0, 25.1, 21.2;

HRMS Calcd (ESI) *m/z* for C<sub>30</sub>H<sub>25</sub>O [M + H]<sup>+</sup>: 401.1900, found: 401.1900.

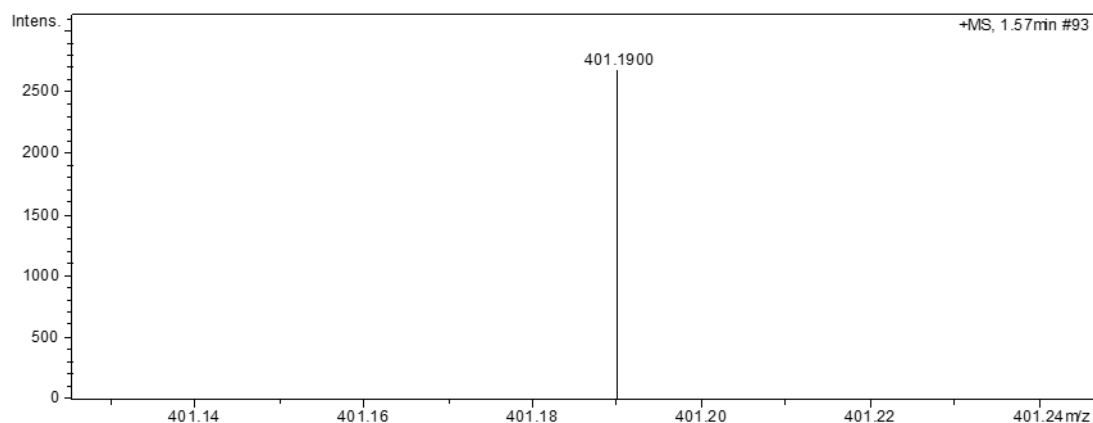

### 2-(4-methoxyphenyl)-3-((9-methyl-9H-fluoren-9-yl)methyl)benzofuran (**5c**)

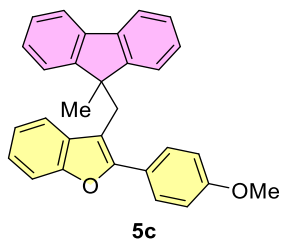

Flash column chromatography on a silica gel (petroleum ether: ethyl acetate, 50: 1) give the product **5c** (58.5 mg, 70% yield) as a yellow solid. Mp: 76-77 °C.

<sup>1</sup>H NMR (CDCl<sub>3</sub>, 400 MHz) δ 7.68 (d, *J* = 7.2 Hz, 2H), 7.44 (d, *J* = 8.0 Hz, 1H), 7.33 (d, *J* = 7.6 Hz, 1H), 7.28-7.22 (m, 3H), 7.19-7.17 (m, 4H), 7.14-7.07 (m, 3H), 6.75-6.73 (m, 2H), 3.78 (s, 3H), 3.30 (s, 2H), 1.62 (s, 3H);

$^{13}\text{C}$  NMR ( $\text{CDCl}_3$ , 100 MHz)  $\delta$  159.3, 153.6, 153.1, 151.6, 139.4, 131.0, 128.6, 127.2, 127.0, 123.9, 123.6, 122.0, 120.8, 119.8, 113.6, 112.0, 110.7, 110.0, 55.2, 51.5, 35.1, 25.1;

HRMS Calcd (ESI)  $m/z$  for  $\text{C}_{30}\text{H}_{25}\text{O}_2$   $[\text{M} + \text{H}]^+$ : 417.1849, found: 417.1849.

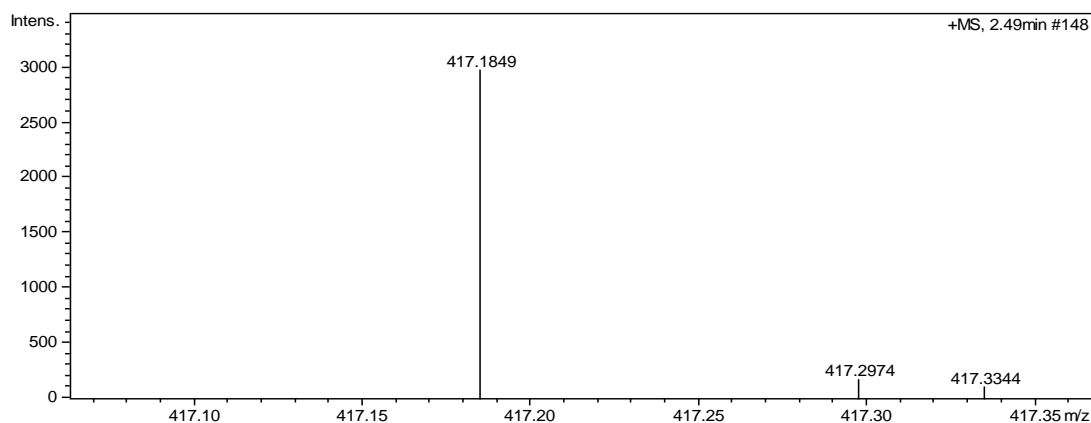

### 2-(4-fluorophenyl)-3-((9-methyl-9H-fluoren-9-yl)methyl)benzofuran (5d)

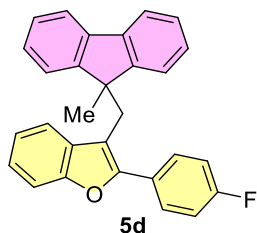

Flash column chromatography on a silica gel (petroleum ether: ethyl acetate, 100: 1) give the product **5d** (71.1 mg, 88% yield) as a yellow solid. Mp: 99-100 °C.

$^1\text{H}$  NMR ( $\text{CDCl}_3$ , 400 MHz)  $\delta$  7.66 (d,  $J = 7.6$  Hz, 2H), 7.46-7.40 (m, 2H), 7.27-7.24 (m, 3H), 7.20-7.16 (m, 5H), 7.08 (t,  $J = 7.6$  Hz, 2H), 6.88 (t,  $J = 8.4$  Hz, 2H), 3.30 (s, 2H), 1.63 (s, 3H);

$^{13}\text{C}$  NMR ( $\text{CDCl}_3$ , 100 MHz)  $\delta$  162.3 (d,  $J = 247.4$  Hz), 153.6, 152.1 151.3, 139.4, 130.8, 129.0 (d,  $J = 8.1$  Hz), 127.4 (d,  $J = 3.2$  Hz), 127.3, 127.0, 124.1, 123.8, 122.2, 121.0, 119.8, 115.2 (d,  $J = 21.5$  Hz), 113.1, 110.8, 51.5, 35.1, 25.0;

$^{19}\text{F}$  NMR ( $\text{CDCl}_3$ , 376 MHz)  $\delta$  -113.1;

HRMS Calcd (ESI)  $m/z$  for  $\text{C}_{29}\text{H}_{22}\text{FO}$   $[\text{M} + \text{H}]^+$ : 405.1649, found: 405.1657.

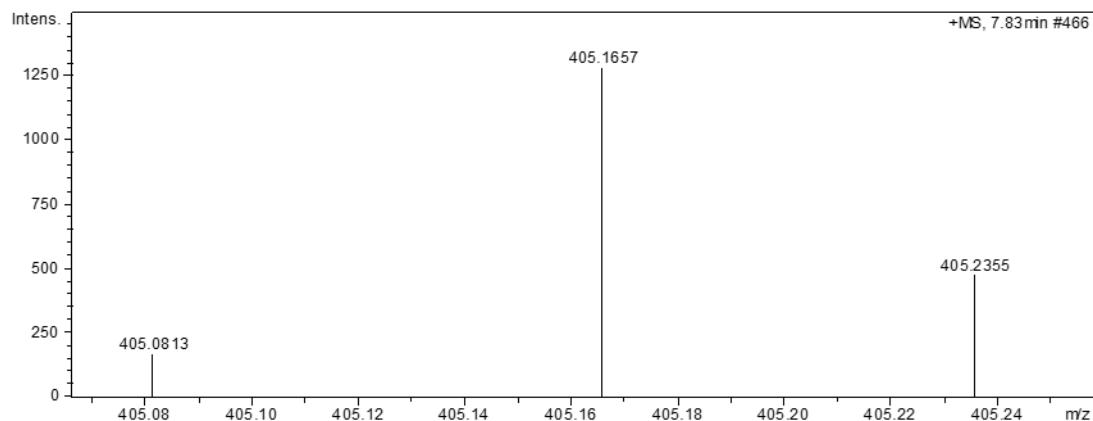

### 2-(4-chlorophenyl)-3-((9-methyl-9H-fluoren-9-yl)methyl)benzofuran (5e)

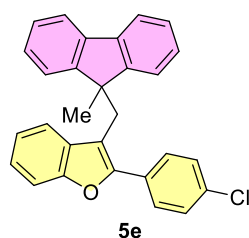

Flash column chromatography on a silica gel (petroleum ether: ethyl acetate:, 100: 1) give the product **5e** (62.3 mg, 74% yield) as a yellow solid. Mp: 95-96 °C.

$^1\text{H NMR}$  ( $\text{CDCl}_3$ , 400 MHz)  $\delta$  7.70 (d,  $J = 7.6$  Hz, 2H), 7.48 (t,  $J = 8.0$  Hz, 2H), 7.32-7.27 (m, 3H), 7.22-7.15 (m, 7H), 7.13-7.09 (m, 2H), 3.33 (s, 2H), 1.67 (s, 3H);

$^{13}\text{C NMR}$  ( $\text{CDCl}_3$ , 100 MHz)  $\delta$  153.7, 151.8, 151.3, 139.4, 133.7, 130.8, 129.6, 128.3, 128.2, 127.3, 127.1, 124.3, 123.8, 122.3, 121.0, 119.9, 113.8, 110.9, 51.5, 35.2, 25.0;

**HRMS** Calcd (ESI)  $m/z$  for  $\text{C}_{29}\text{H}_{21}\text{ClO}_2\text{Na}$   $[\text{M} + \text{Na}]^+$ : 443.1173, found: 443.1179.

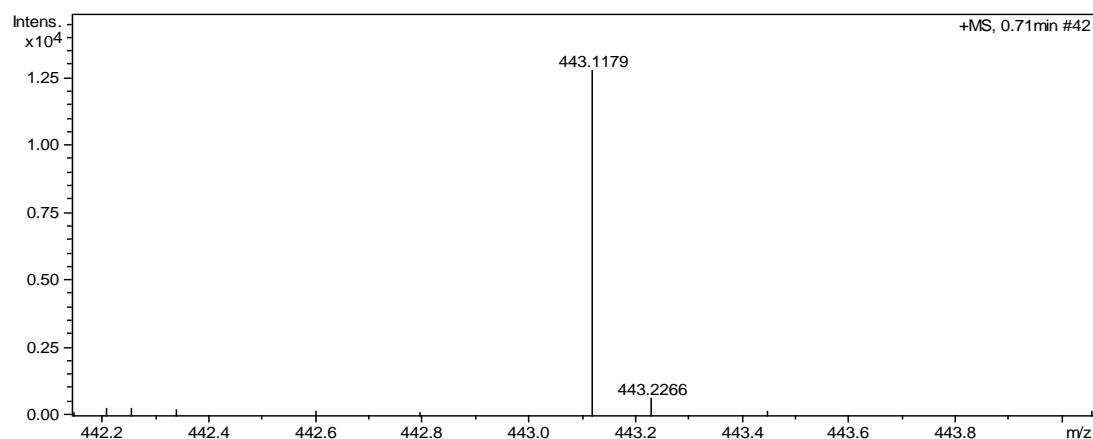

### 3-((9-methyl-9H-fluoren-9-yl)methyl)-2-(m-tolyl)benzofuran (5f)

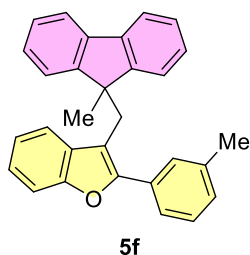

Flash column chromatography on a silica gel (petroleum ether: ethyl acetate:, 100: 1) give the product **5f** (62,4 mg, 78% yield) as a yellow solid. Mp: 103-104 °C.

$^1\text{H NMR}$  ( $\text{CDCl}_3$ , 400 MHz)  $\delta$  7.69 (d,  $J = 7.2$  Hz, 2H), 7.47 (d,  $J = 8.0$  Hz, 1H), 7.42 (d,  $J = 7.6$  Hz, 1H), 7.29-7.23 (m, 3H), 7.18-7.07 (m, 7H), 7.01 (d,  $J = 6.8$  Hz, 1H), 6.88 (s, 1H), 3.32 (s, 2H), 2.19 (s, 3H), 1.65 (s, 3H);

$^{13}\text{C NMR}$  ( $\text{CDCl}_3$ , 100 MHz)  $\delta$  153.7, 153.2, 151.6, 139.5, 137.7, 130.9 (2C), 128.7, 128.0, 127.8, 127.2, 127.0, 124.3, 124.0, 123.9, 122.1, 121.0, 119.8, 113.2, 110.8, 51.5, 35.1, 25.2, 21.4;

**HRMS** Calcd (ESI)  $m/z$  for  $\text{C}_{30}\text{H}_{25}\text{O}$   $[\text{M} + \text{H}]^+$ : 401.1900, found: 401.1905.

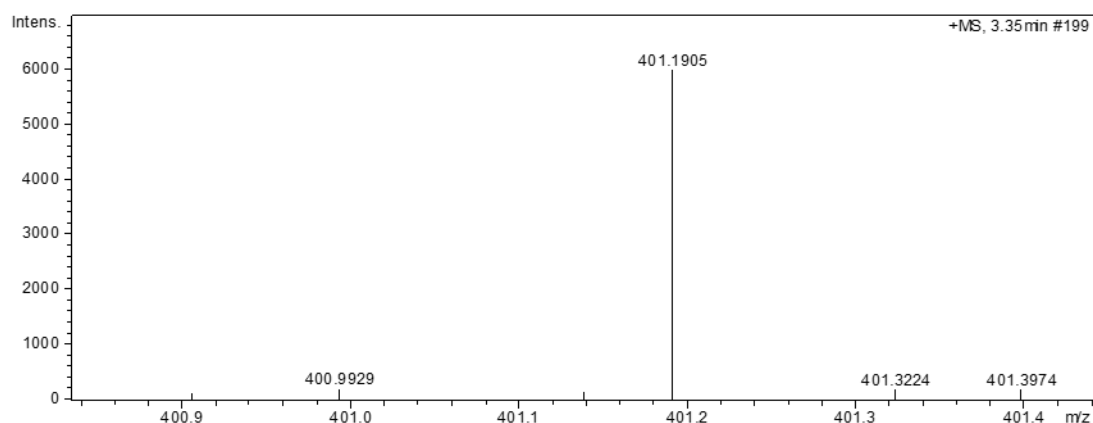

### 3-((9-methyl-9H-fluoren-9-yl)methyl)-2-(naphthalen-2-yl)benzofuran (**5g**)

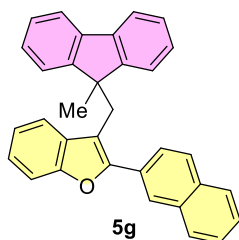

Flash column chromatography on a silica gel (petroleum ether: ethyl acetate, 100: 1) give the product **5g** (78.2 mg, 90% yield) as a yellow solid. Mp: 122-123 °C.

$^1\text{H NMR}$  ( $\text{CDCl}_3$ , 400 MHz)  $\delta$  7.75-7.73 (m, 3H), 7.68 (d,  $J = 8.4$  Hz, 1H), 7.57-7.55 (m, 1H), 7.53-7.48 (m, 3H), 7.44-7.40 (m, 3H), 7.31-7.27 (m, 1H), 7.27-7.24 (m, 1H), 7.23-7.21 (m, 2H), 7.19-7.17 (m, 2H), 7.06-7.02 (m, 2H), 3.40 (s, 2H), 1.68 (s, 3H);  
 $^{13}\text{C NMR}$  ( $\text{CDCl}_3$ , 100 MHz)  $\delta$  154.0, 153.1, 151.6, 139.5, 133.0, 132.7, 131.0, 128.4 (2C), 127.7, 127.4, 127.3, 127.1, 126.5, 126.3, 126.1, 124.8, 124.2, 123.9, 122.2, 121.1, 119.9, 113.9, 110.9, 51.6, 35.4, 25.3;

**HRMS** Calcd (ESI)  $m/z$  for  $\text{C}_{33}\text{H}_{25}\text{O}$  [ $\text{M} + \text{H}$ ] $^+$ : 437.1900, found: 437.1905.

LHR-1-153-4 #772 RT: 3.45 AV: 1 NL: 8.86E6  
T: FTMS + p ESI Full ms [100.0000-1000.0000]

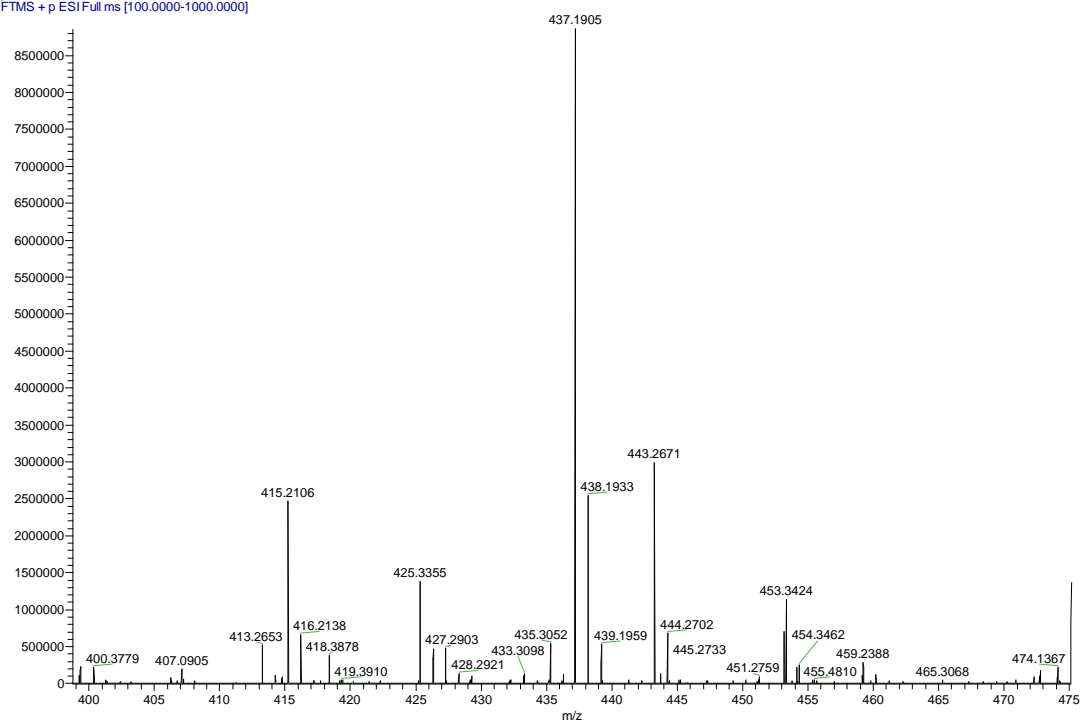

### 3-((9-methyl-9H-fluoren-9-yl)methyl)-2-(thiophen-2-yl)benzofuran (**5h**)

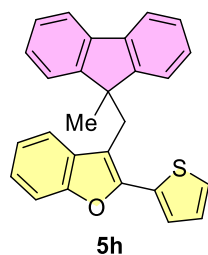

Flash column chromatography on a silica gel (petroleum ether: ethyl acetate, 100: 1) give the product **5h** (14.2 mg, 18% yield) as a brown solid. Mp: 117-119 °C.

$^1\text{H NMR}$  ( $\text{CDCl}_3$ , 400 MHz)  $\delta$  7.73-7.70 (m, 2H), 7.49-7.46 (m, 1H), 7.41-7.38 (m, 1H), 7.31-7.26 (m, 3H), 7.24-7.22 (m, 2H), 7.18-7.16 (m, 2H), 7.14-7.09 (m, 2H), 6.86-6.83 (m, 1H), 6.78-6.76 (m, 1H), 3.28 (s, 2H), 1.68 (s, 3H);

$^{13}\text{C}$  NMR ( $\text{CDCl}_3$ , 100 MHz)  $\delta$  153.7, 151.5, 148.9, 139.4, 132.9, 130.8, 127.3, 127.1, 125.8, 125.4, 124.3, 123.8, 122.4, 120.9, 119.9, 112.8, 110.8, 51.4, 35.4, 24.9;

HRMS Calcd (ESI)  $m/z$  for  $\text{C}_{27}\text{H}_{21}\text{OS}$   $[\text{M} + \text{H}]^+$ : 393.1308, found: 393.1318.

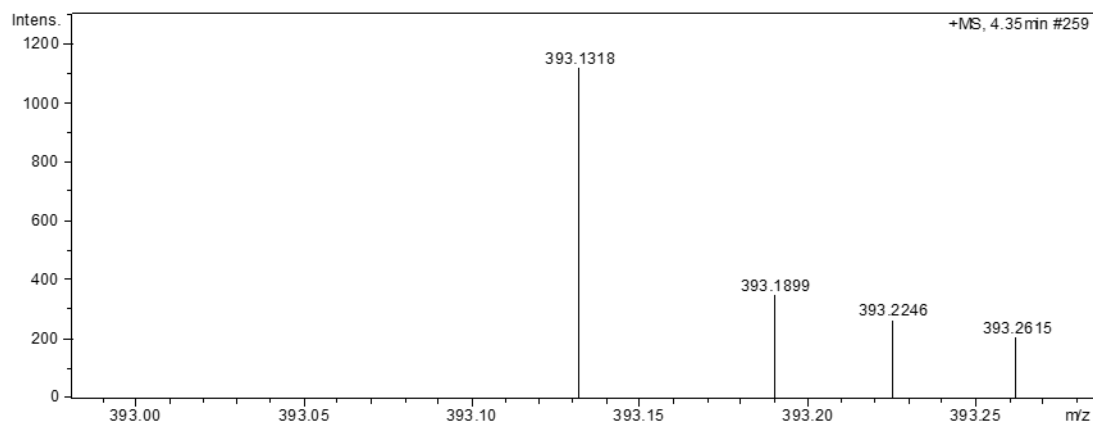

### 3-((3,9-dimethyl-9H-fluoren-9-yl)methyl)-2-phenylbenzofuran (**5i**)

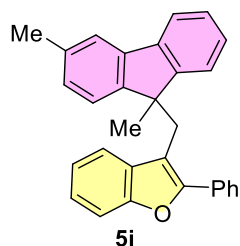

Flash column chromatography on a silica gel (petroleum ether: ethyl acetate, 100: 1) give the product **5i** (66.8 mg, 83% yield) as a yellow solid. Mp: 111-112 °C.

$^1\text{H}$  NMR ( $\text{CDCl}_3$ , 400 MHz)  $\delta$  7.63 (d,  $J = 7.6$  Hz, 1H), 7.48-7.45 (m, 2H), 7.36 (d,  $J = 8.0$  Hz, 1H), 7.26-7.24 (m, 3H), 7.22-7.20 (m, 4H), 7.15-7.13 (m, 2H), 7.06-7.03 (m, 2H), 6.88 (d,  $J = 7.2$  Hz, 1H), 3.31 (s, 2H), 2.36 (s, 3H) 1.58 (s, 3H);

$^{13}\text{C}$  NMR ( $\text{CDCl}_3$ , 100 MHz)  $\delta$  153.7, 152.9, 151.7, 148.7, 139.5 (2C), 136.8, 131.2, 130.9, 128.1, 127.9, 127.8, 127.2, 127.1, 126.8, 124.0, 123.8, 123.5, 122.0, 121.0, 120.4, 119.6, 113.4, 110.8, 51.1, 35.1, 25.1, 21.4;

HRMS Calcd (ESI)  $m/z$  for  $\text{C}_{30}\text{H}_{25}\text{O}$   $[\text{M} + \text{H}]^+$ : 401.1900, found: 401.1901.

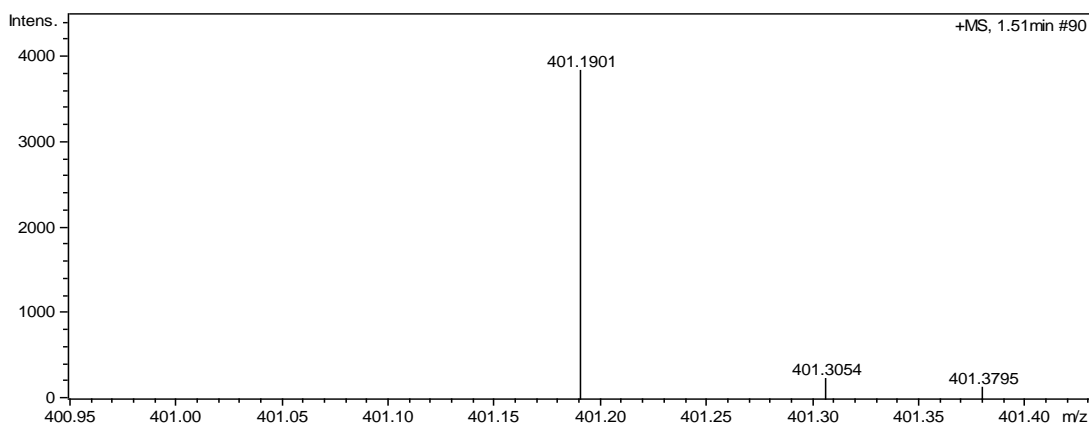

### 3-((2-methoxy-9-methyl-9H-fluoren-9-yl)methyl)-2-phenylbenzofuran (**5j**)

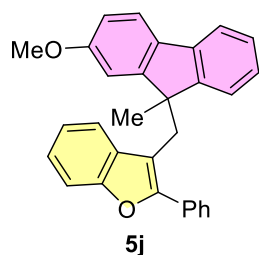

Flash column chromatography on a silica gel (petroleum ether: ethyl acetate, 50: 1) give the product **5j** (60.9 mg, 73% yield) as a yellow solid. Mp: 66-67 °C.

$^1\text{H NMR}$  ( $\text{CDCl}_3$ , 400 MHz)  $\delta$  7.56 (t,  $J = 8.8$  Hz, 2H), 7.46 (d,  $J = 8.4$  Hz, 1H), 7.37-7.35 (m, 2H), 7.30 (d,  $J = 7.2$  Hz, 1H), 7.25-7.22 (m, 5H), 7.19 (d,  $J = 7.6$  Hz, 1H), 7.13 (t,  $J = 7.6$  Hz, 1H), 7.04 (t,  $J = 7.2$  Hz, 1H), 6.79-6.76 (m, 1H), 6.62-6.61 (m, 1H), 3.56 (s, 3H), 3.40 (d,  $J = 14.4$  Hz, 1H), 3.28 (d,  $J = 14.4$  Hz, 1H), 1.57 (s, 3H);

$^{13}\text{C NMR}$  ( $\text{CDCl}_3$ , 100 MHz)  $\delta$  159.2, 153.7, 153.1, 152.9, 151.2, 139.4, 132.3, 131.3, 131.0, 128.2, 127.9, 127.2, 127.1, 125.9, 124.0, 123.5, 122.1, 121.0, 120.5, 119.0, 113.4, 113.1, 110.8, 109.7, 55.3, 51.5, 35.1, 24.9;

**HRMS** Calcd (ESI)  $m/z$  for  $\text{C}_{30}\text{H}_{24}\text{NaO}_2$   $[\text{M} + \text{Na}]^+$ : 439.1669, found:439.1661.

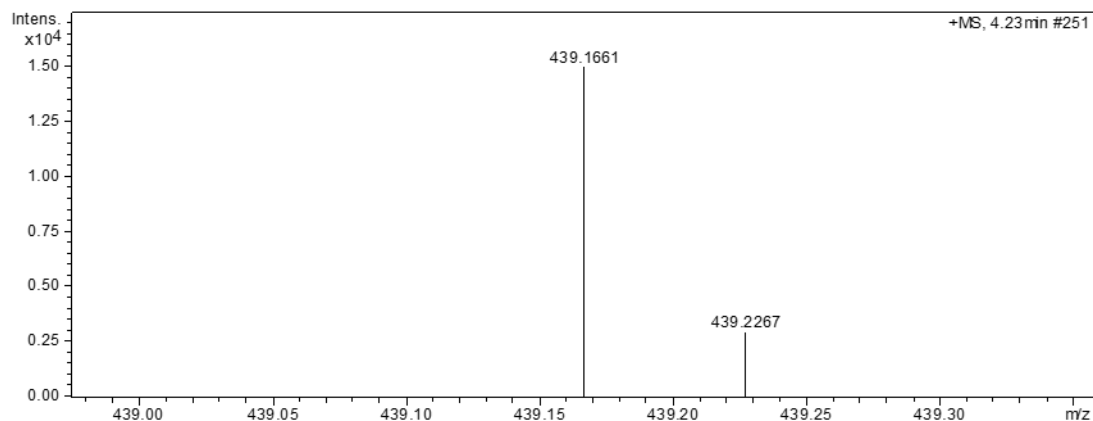

### 3-((3-fluoro-9-methyl-9H-fluoren-9-yl)methyl)-2-phenylbenzofuran (**5k**)

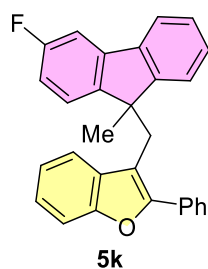

Flash column chromatography on a silica gel (petroleum ether: acetone, 100: 1) give the product **5k** (67.5 mg, 83% yield) as a yellow solid. Mp: 117-118 °C.

<sup>1</sup>H NMR (CDCl<sub>3</sub>, 400 MHz) δ 7.59 (d, *J* = 7.6 Hz, 1H), 7.44 (d, *J* = 8.0 Hz, 1H), 7.30-7.21 (m, 10H), 7.14-7.10 (m, 2H), 7.01-6.98 (m, 1H), 6.70-6.66 (m, 1H), 3.36 (q, *J* = 13.2 Hz, 2H), 1.58 (s, 3H);

<sup>13</sup>C NMR (CDCl<sub>3</sub>, 100 MHz) δ 162.7 (d, *J* = 242.4 Hz), 153.7, 152.9, 152.3, 146.5, 141.4 (d, *J* = 8.6 Hz), 138.5 (d, *J* = 3.0 Hz), 131.2, 130.7, 128.2, 128.0, 127.6, 127.3, 127.2, 124.9 (d, *J* = 9.0 Hz), 124.0, 123.8, 122.1, 120.8, 120.0, 113.5 (d, *J* = 22.7 Hz), 113.0, 110.8, 106.7 (d, *J* = 22.8 Hz), 51.1, 34.9, 25.1;

<sup>19</sup>F NMR (CDCl<sub>3</sub>, 376 MHz) δ -116.0;

HRMS Calcd (ESI) *m/z* for C<sub>29</sub>H<sub>22</sub>FO [M + H]<sup>+</sup>: 405.1649, found: 405.1654.

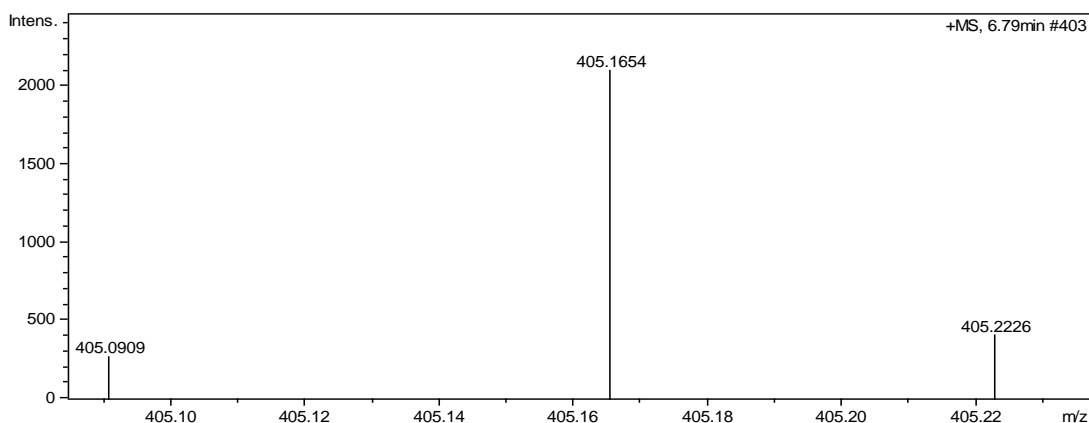

### 3-((2-chloro-9-methyl-9H-fluoren-9-yl)methyl)-2-phenylbenzofuran (**5I**)

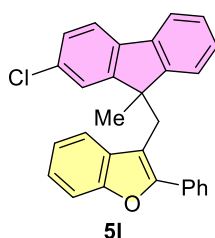

Flash column chromatography on a silica gel (petroleum ether: ethyl acetate, 100:1) give the product **5I** (63.5 mg, 75% yield) as a yellow solid. Mp: 101-102 °C.

$^1\text{H NMR}$  ( $\text{CDCl}_3$ , 400 MHz)  $\delta$  7.50 (d,  $J = 7.6$  Hz, 1H), 7.42 (d,  $J = 8.4$  Hz, 1H), 7.36 (d,  $J = 8.4$  Hz, 1H), 7.28-7.26 (m, 2H), 7.20-7.13 (m, 6H), 7.11-7.08 (m, 2H), 7.06-6.99 (m, 3H), 3.30 (s, 2H), 1.48 (s, 3H);

$^{13}\text{C NMR}$  ( $\text{CDCl}_3$ , 100 MHz)  $\delta$  153.6, 153.1, 153.0, 151.2, 138.5, 138.0, 132.5, 131.2, 130.6, 128.3, 128.1, 127.4, 127.3 (2C), 127.2, 124.5, 124.0, 123.8, 122.1, 120.7 (2C), 119.8, 112.5, 110.8, 51.7, 34.8, 24.8;

**HRMS** Calcd (ESI) m/z for  $\text{C}_{29}\text{H}_{22}\text{ClO}$   $[\text{M} + \text{H}]^+$ : 421.1354, found: 421.1361.

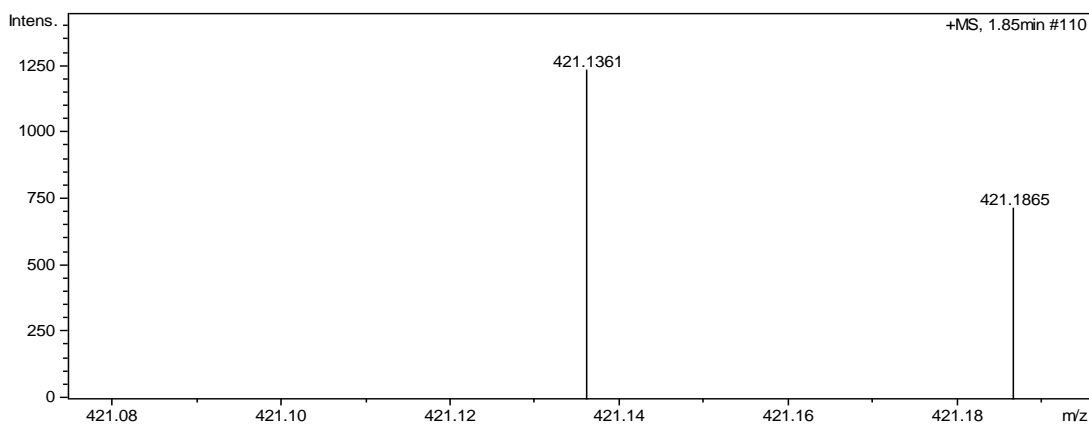

## 7. Synthetic transformations.

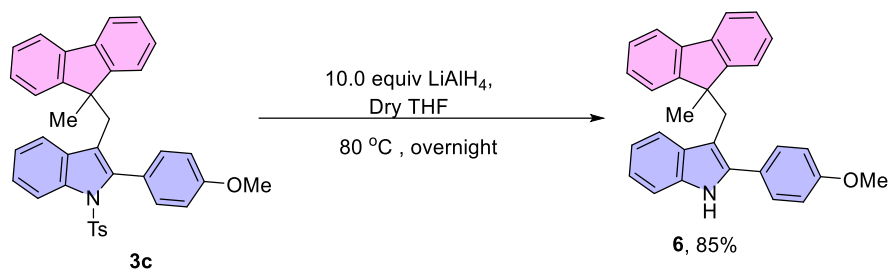

Under argon atmosphere, an oven-drying round-bottom flask (50 mL) equipped with a magnetic stir bar was charged with **3c** (569.2 mg, 1.0 mmol, 1.0 equiv), LiAlH<sub>4</sub> (379.5 mg, 10.0 mmol, 10.0 equiv) and 10 mL Dry THF were added sequentially. Degassed solvent and backfilled with argon for 3 times. Then, the tube was sealed with a rubber stopper at r.t., and the reaction mixture was stirred at 80 °C for 9 h. After completion of the reaction (monitored by TLC), the mixture was diluted with water and extracted with EA (3 × 20 mL). The combined organic layers were dried over anhydrous Na<sub>2</sub>SO<sub>4</sub>, filtered, and concentrated under reduced pressure and the residue was purified by flash column chromatography on silica gel with petroleum ether-ethyl acetate (10:1) as eluent to give the desired product **6** (352.0 mg, 85% yield) as a yellow oil.

### 2-(4-methoxyphenyl)-3-((9-methyl-9H-fluoren-9-yl)methyl)-1H-indole (**6**)

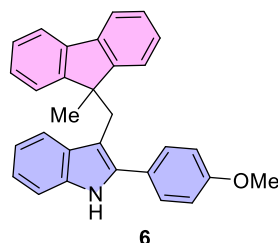

Flash column chromatography on a silica gel (petroleum ether: ethyl acetate, 10:1) give the product **6** (352.0 mg, 85% yield) as a yellow oil.

<sup>1</sup>H NMR (CDCl<sub>3</sub>, 400 MHz) δ 7.93 (s, 1H), 7.70 (d, *J* = 7.6 Hz, 2H), 7.41 (d, *J* = 8.0 Hz, 1H), 7.34-7.29 (m, 3H), 7.21-7.17 (m, 1H), 7.15-7.13 (m, 4H), 7.09-7.05 (m, 3H), 6.86-6.84 (m, 2H), 3.84 (s, 3H), 3.39 (s, 2H), 1.58 (s, 3H);

<sup>13</sup>C NMR (CDCl<sub>3</sub>, 100 MHz) δ 158.9, 152.2, 139.4, 136.4, 135.3, 129.9, 129.6, 126.8, 126.7, 126.1, 124.0, 121.5, 120.5, 119.6, 119.1, 113.9, 110.3, 109.8, 55.2, 52.1, 35.2, 25.1;

HRMS Calcd (ESI) *m/z* for C<sub>30</sub>H<sub>26</sub>NO [M + H]<sup>+</sup>: 416.2009, found: 416.2006.

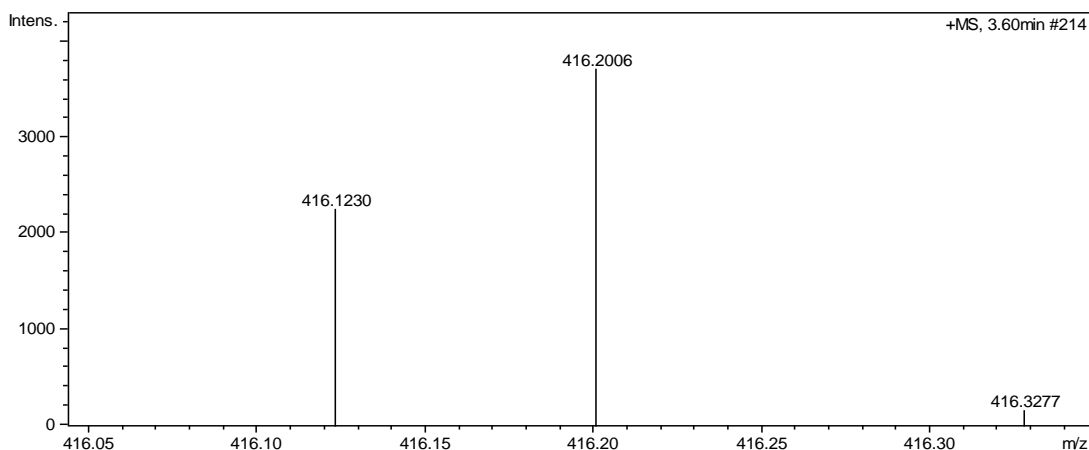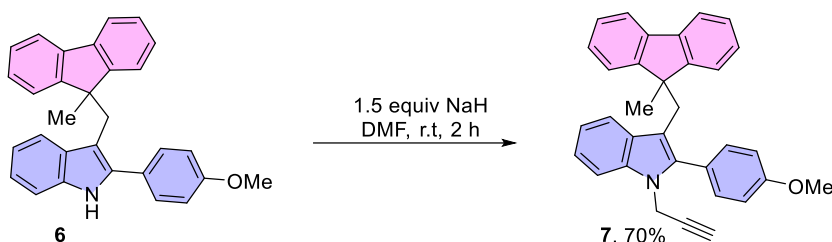

A round bottle flask equipped with a magnetic stir bar was charged with product **6** (352.0 mg, 0.85 mmol, 1.0 equiv) and DMF (10 mL). After cooling to 0 °C, NaH (32.0 mg 60% NaH, 1.3 mmol, 1.5 equiv) was added slowly and stirred 5 min. Then, propargyl bromide (154.6 mg, 1.3 mmol, 1.5 equiv) was added at 0 °C. The reaction mixture was stirred 2 h at room temperature. Upon the completion of the reaction (monitored by TLC), the reaction mixture was quenched with H<sub>2</sub>O and extracted with ethyl acetate (3×15 mL) Then, the mixture was concentrated in vacuum and the residue was purified by flash column chromatography on silica gel with petroleum ether-ethyl acetate as eluent to give the desired product **7** (270.1 mg, 70% yield) as a white solid.

**2-(4-methoxyphenyl)-3-((9-methyl-9H-fluoren-9-yl)methyl)-1-(prop-2-yn-1-yl)-1H-indole (7)**

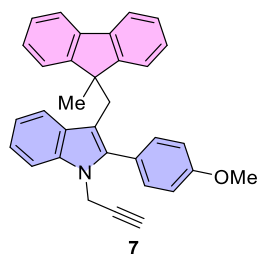

Flash column chromatography on a silica gel (petroleum ether: ethyl acetate, 10: 1) give the product **7** (270.1 mg, 70% yield) as a white soild. Mp: 110-112 °C.

<sup>1</sup>H NMR (CDCl<sub>3</sub>, 400 MHz) δ 7.70 (d, *J* = 7.6 Hz, 2H), 7.50 (d, *J* = 8.4 Hz, 1H), 7.34-

7.27 (m, 4H), 7.19-7.15 (m, 2H), 7.12-7.05 (m, 5H), 6.95-6.91 (m, 2H), 4.67 (s, 2H), 3.88 (s, 3H), 3.24 (s, 2H), 2.30 (t,  $J = 2.4$  Hz, 1H), 1.50 (s, 3H);

$^{13}\text{C}$  NMR ( $\text{CDCl}_3$ , 100 MHz)  $\delta$  159.3, 152.3, 139.4, 139.1, 135.9, 132.1, 129.0, 126.7 (2C), 124.1, 123.6, 121.6, 120.8, 119.6, 119.4, 113.7, 111.2, 109.4, 79.1, 72.0, 55.2, 51.8, 35.5, 33.6, 25.0;

HRMS Calcd (ESI)  $m/z$  for  $\text{C}_{33}\text{H}_{28}\text{NO}$   $[\text{M} + \text{H}]^+$ : 454.2165, found: 454.2164.

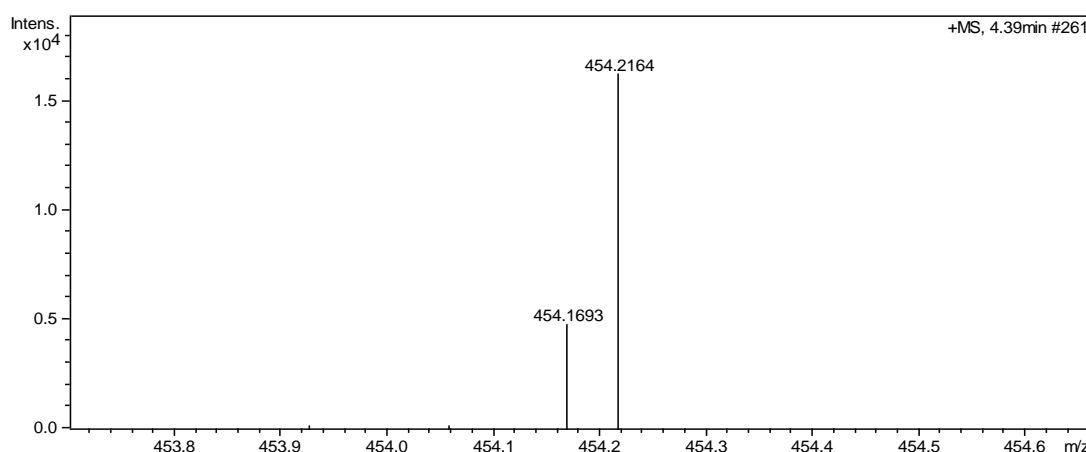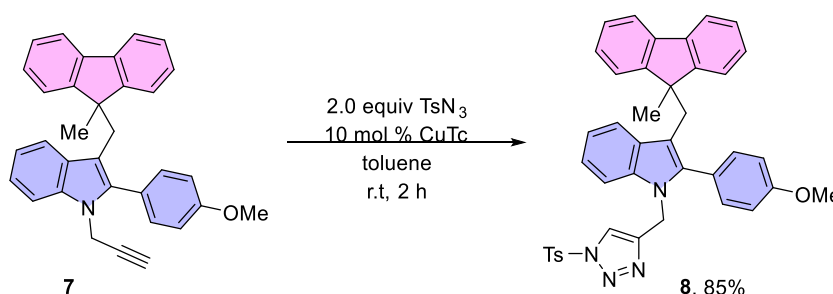

A sealed tube (10 mL) equipped with a magnetic stir bar was charged with product **7** (90.7 mg, 0.2 mmol, 1.0 equiv), CuTc (3.8 mg, 0.02 mmol, 0.1 equiv), TsN<sub>3</sub> (78.9 mg, 0.4 mmol, 2.0 equiv) and 2.0 mL toluene. Degassed toluene and backfilled with argon for 3 times (3 × 1min) at -78 °C. The reaction mixture was kept stirring at room temperature for 2 h. After completion of the reaction (monitored by TLC), the mixture was concentrated in vacuum and the residue was purified by flash column chromatography on silica gel with petroleum ether-ethyl acetate as eluent to give the desired product **8** (111.1 mg, 85% yield) as a white solid.

**2-(4-methoxyphenyl)-3-((9-methyl-9H-fluoren-9-yl)methyl)-1-((1-tosyl-1H-1,2,3-triazol-4-yl)methyl)-1H-indole (**8**)**

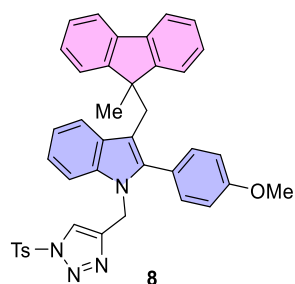

Flash column chromatography on a silica gel (petroleum ether: ethyl acetate, 5: 1) give the product **8** (111.1 mg, 85% yield) as a white soild. Mp: 87-89 °C.

<sup>1</sup>H NMR (CDCl<sub>3</sub>, 400 MHz) δ 7.89 (d, *J* = 8.4 Hz, 2H), 7.61 (d, *J* = 7.6 Hz, 2H), 7.35-7.32 (m, 3H), 7.28-7.24 (m, 2H), 7.23-7.22 (m, 1H), 7.16 (d, *J* = 8.4 Hz, 1H), 7.13-7.06 (m, 3H), 7.02 (d, *J* = 7.6 Hz, 2H), 6.99-6.95 (m, 1H), 6.79-6.73 (m, 4H), 5.18 (s, 2H), 3.80 (s, 3H), 3.18 (s, 2H), 2.42 (s, 3H), 1.49 (s, 3H);

<sup>13</sup>C NMR (CDCl<sub>3</sub>, 100 MHz) δ 159.3, 152.2, 147.3, 145.1, 139.5, 138.8, 135.6, 132.7, 132.0, 130.4, 128.7, 128.6, 126.8, 126.6, 123.9, 123.3, 121.6, 121.2, 120.8, 119.6, 119.3, 113.8, 111.5, 109.1, 55.2, 51.9, 39.2, 35.7, 25.4, 21.8;

HRMS Calcd (ESI) *m/z* for C<sub>40</sub>H<sub>35</sub>N<sub>4</sub>O<sub>3</sub>S [M + H]<sup>+</sup>: 651.2424, found: 654.2425.

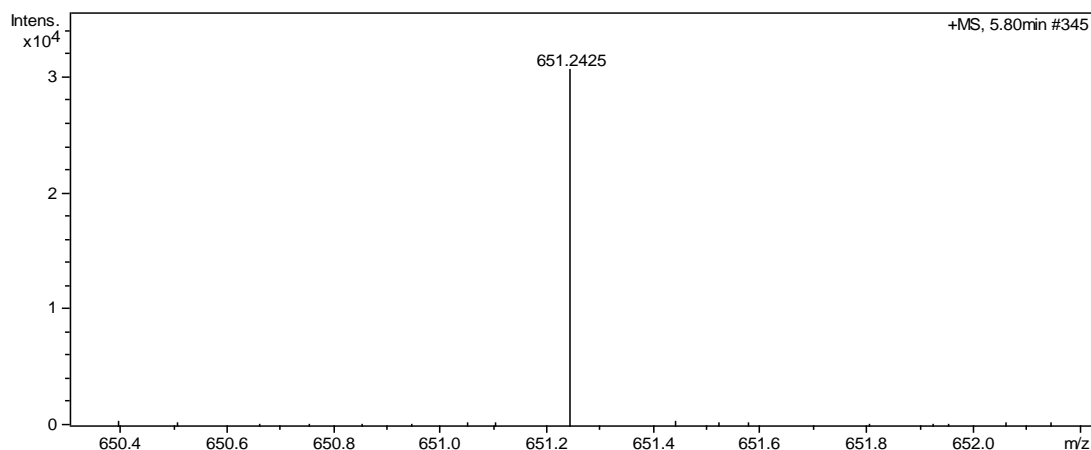

## 8. Enantioselective synthesis of **3q**.

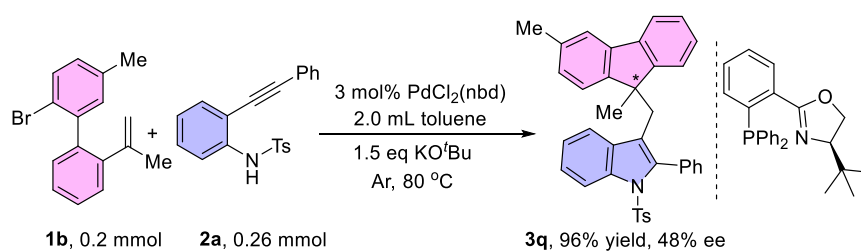

A sealed tube (10 mL) equipped with a magnetic stir bar was charged with Dichloro(norbornadiene)palladium(II) (3.2 mg, 0.012 mmol, 0.06 equiv), (*R*)-*t*Bu-Phox

(6.2 mg, 0.016 mmol, 0.08 equiv) in 2.0 mL toluene. After the catalyst/ligand was stirred for 30 min at 30 °C. 2-bromo-5-methyl-2'-(prop-1-en-2-yl)-1,1'-biphenyl **1b** (57.4 mg, 0.2 mmol, 1.0 equiv), 4-methyl-*N*-(2-(phenylethynyl)phenyl) benzenesulfonamide **2a** (90.3 mg, 0.26 mmol, 1.3 equiv), and KO<sup>t</sup>Bu (33.7 mg, 0.3 mmol, 1.5 equiv) were added sequentially. Degassed toluene and backfilled with argon for 3 times (3× 1 min) at -78 °C. The reaction mixture was kept stirring at 80 °C for 24 h by use of module heating. After completion of the reaction (monitored by TLC), the mixture was concentrated in vacuum and the residue was purified by flash column chromatography on silica gel with petroleum ether-acetone or petroleum ether- ethyl acetate as eluent to give the desired product chiral **3q** 106.8 mg in 96% yield with 48% *ee*.

#### <Chromatogram>

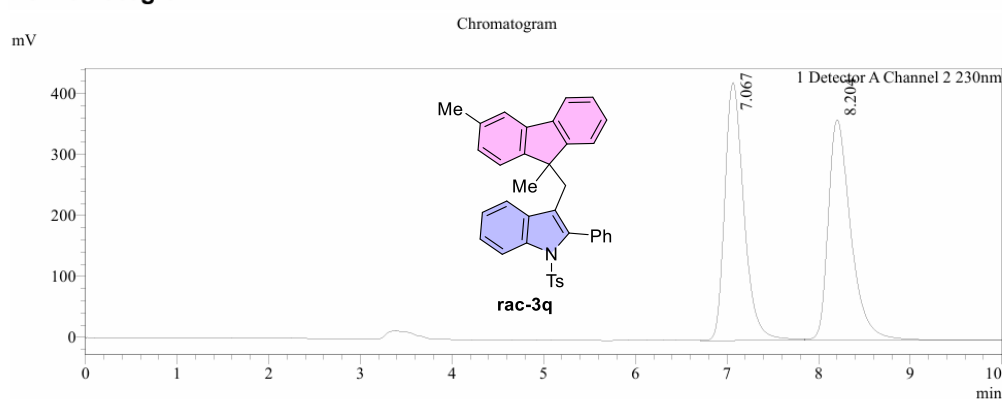

#### <Peak Table>

Peak Table

| Detector A Channel 2 230nm |           |          |        |         |
|----------------------------|-----------|----------|--------|---------|
| Peak#                      | Ret. Time | Area     | Height | Area%   |
| 1                          | 7.067     | 6146155  | 422715 | 49.665  |
| 2                          | 8.204     | 6229081  | 361504 | 50.335  |
| Total                      |           | 12375236 | 784219 | 100.000 |

### <Chromatogram>

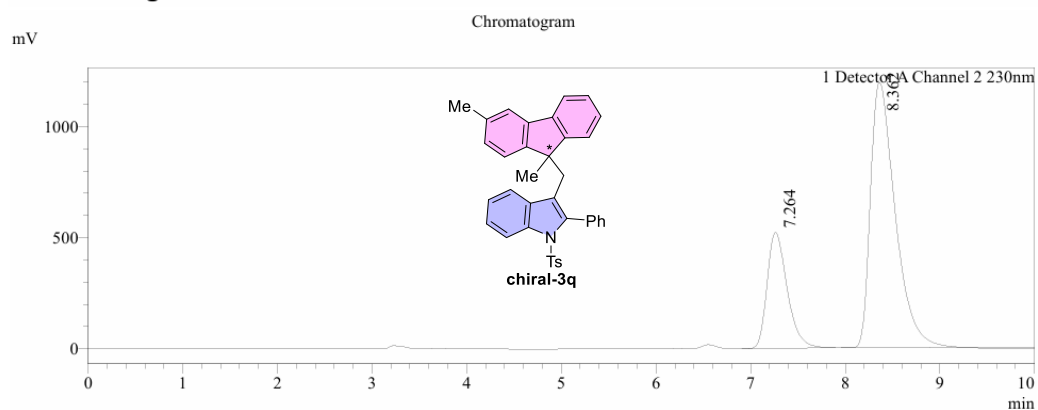

### <Peak Table>

Peak Table

Detector A Channel 2 230nm

| Peak# | Ret. Time | Area     | Height  | Area%   |
|-------|-----------|----------|---------|---------|
| 1     | 7.264     | 7661666  | 521426  | 26.236  |
| 2     | 8.362     | 21540936 | 1193376 | 73.764  |
| Total |           | 29202602 | 1714802 | 100.000 |

**Chiral 3q HPLC conditions:** Daicel Chiralpak IB column (1.0 mL/min, hexane/2-propanol = 95/5), 230 nm; tr (minor) = 7.26 min, tr (major) = 8.36 min, 48% *ee*.

$[\alpha]_{\text{D}}^{20} = 2.725$  (c = 0.2, CHCl<sub>3</sub>).

## 9. Single Crystal X-Ray Diffraction

Crystals of **3f** were obtained by slow diffusion from a solution of the compounds in ethyl acetate layered with petroleum ether at room temperature for several days (Figures 1). Crystal data and details of the structure determination are presented in Table S2.

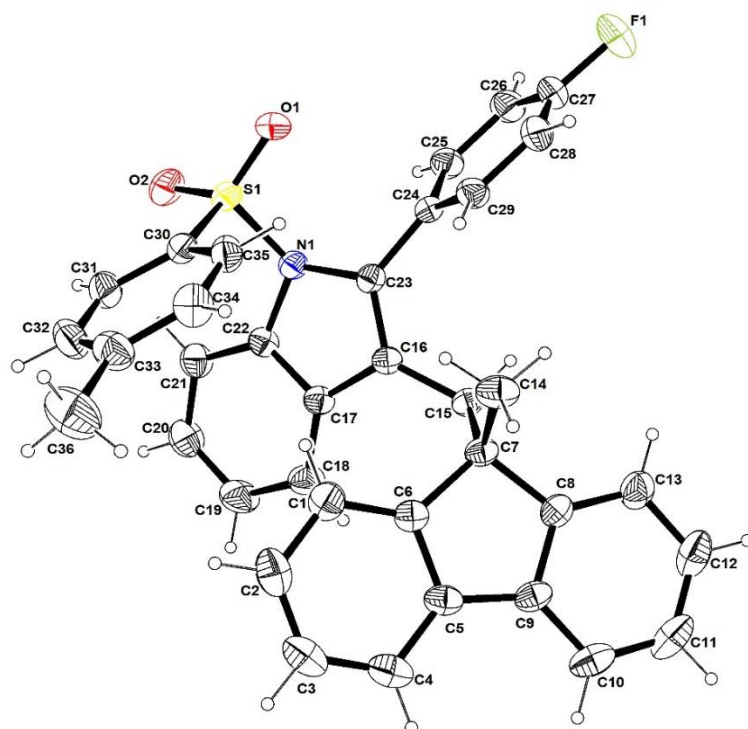

Figure 1. ORTEP drawing (30%) of the Crystal structure of **3f**

**Table S2** The single crystal data of compounds **3f**

| <b>Phase</b>                                | <b>3f</b>                                                        |
|---------------------------------------------|------------------------------------------------------------------|
| Identification code                         | 123                                                              |
| Empirical formula                           | C <sub>36</sub> H <sub>28</sub> FNO <sub>2</sub> S               |
| Formula weight                              | 557.65                                                           |
| Temperature/K                               | 273.15                                                           |
| Crystal system                              | triclinic                                                        |
| Space group                                 | P-1                                                              |
| a/Å                                         | 10.8464(6)                                                       |
| b/Å                                         | 12.0177(6)                                                       |
| c/Å                                         | 12.8579(9)                                                       |
| α/°                                         | 62.168(2)                                                        |
| β/°                                         | 85.094(2)                                                        |
| γ/°                                         | 74.649(2)                                                        |
| Volume/Å <sup>3</sup>                       | 1427.83(15)                                                      |
| Z                                           | 2                                                                |
| ρ <sub>calc</sub> /cm <sup>3</sup>          | 1.297                                                            |
| μ /mm <sup>-1</sup>                         | 0.154                                                            |
| F(000)                                      | 584.0                                                            |
| Crystal size/mm <sup>3</sup>                | 0.31 × 0.26 × 0.17                                               |
| Radiation                                   | MoK α (λ = 0.71073)                                              |
| 2θ range for data collection/°              | 4.798 to 55.058                                                  |
| Index ranges                                | -14 ≤ h ≤ 12, -15 ≤ k ≤ 15,<br>-16 ≤ l ≤ 16                      |
| Reflections collected                       | 22418                                                            |
| Independent reflections                     | 6552 [R <sub>int</sub> = 0.0411, R <sub>sigma</sub> =<br>0.0554] |
| Data/restraints/parameters                  | 6552/0/372                                                       |
| Goodness-of-fit on F <sup>2</sup>           | 1.015                                                            |
| Final R indexes [I ≥ 2σ (I)]                | R <sub>1</sub> = 0.0519, wR <sub>2</sub> = 0.1089                |
| Final R indexes [all data]                  | R <sub>1</sub> = 0.1058, wR <sub>2</sub> = 0.1287                |
| Largest diff. peak/hole / e Å <sup>-3</sup> | 0.17/-0.33                                                       |

## 10. References

- [1]. Z. Shen, X. Lu, *Adv. Synth. Catal.* 2009, 351, 3107-3112.
- [2]. Y. Horino, M. Ishibashi, J. Sakamoto, M. Murakami, T. Korenaga, *Adv. Synth. Catal.* 2021, 363, 3592-3599

## 11. Copies of NMR spectra for new compounds

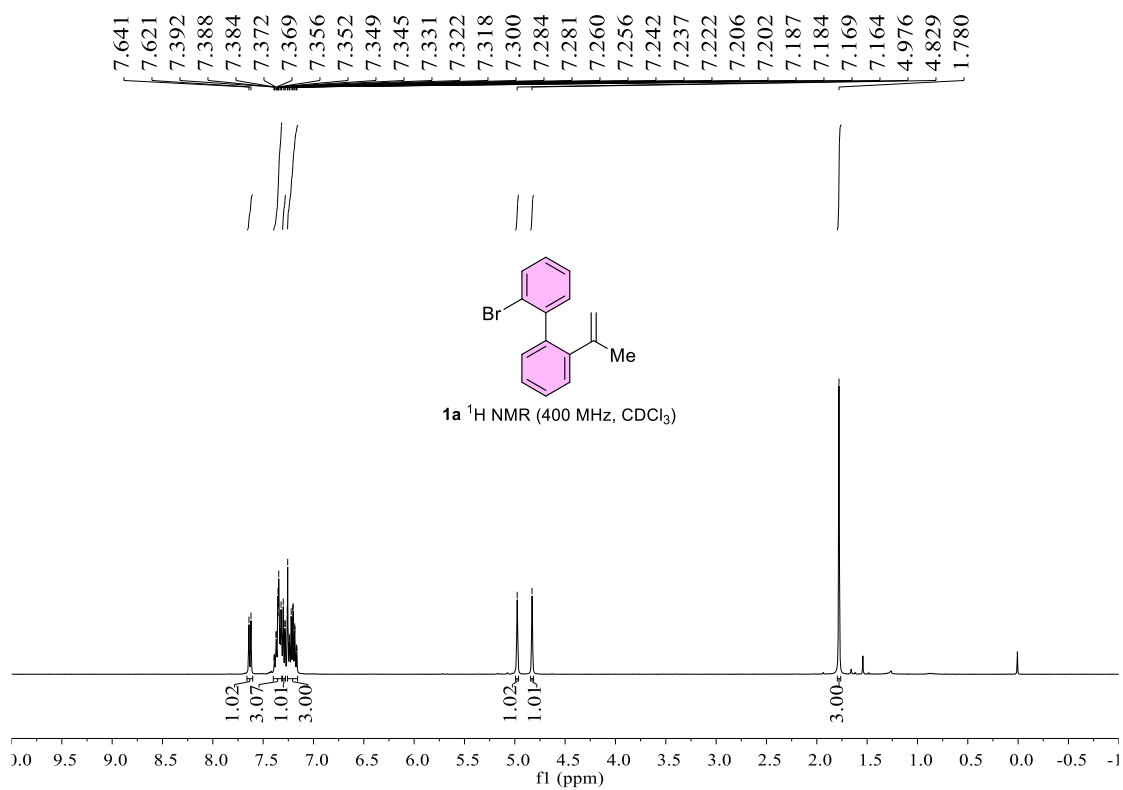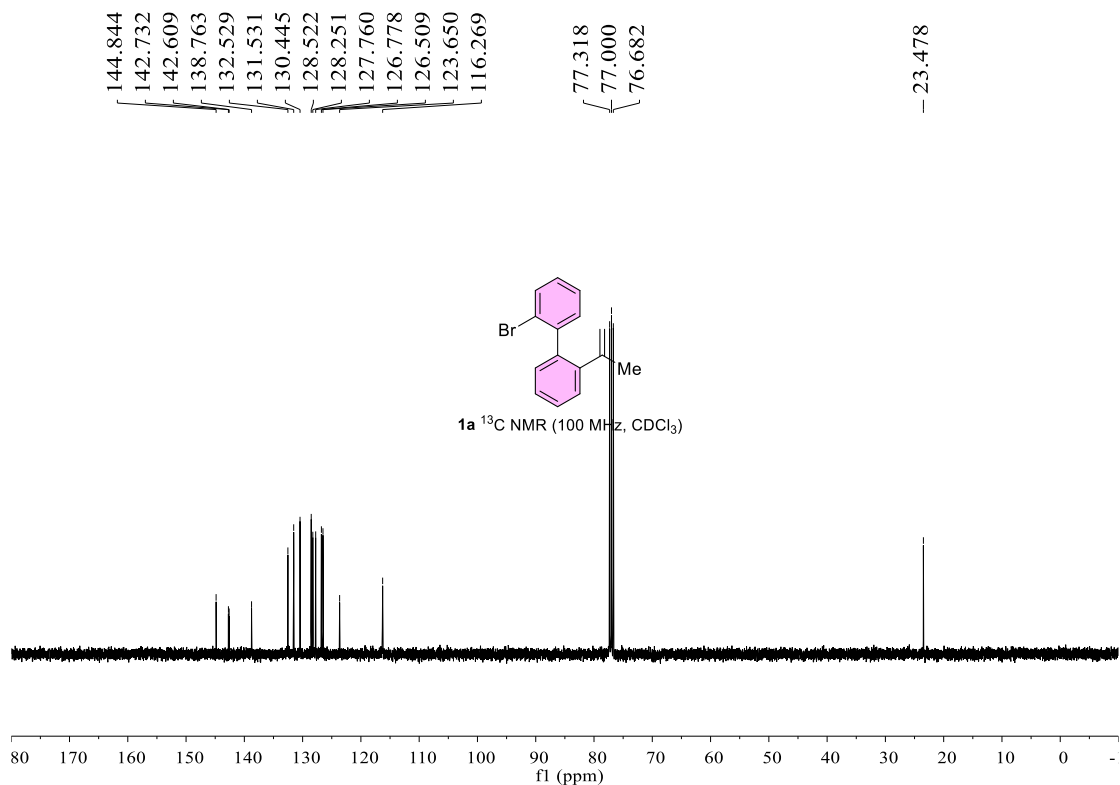



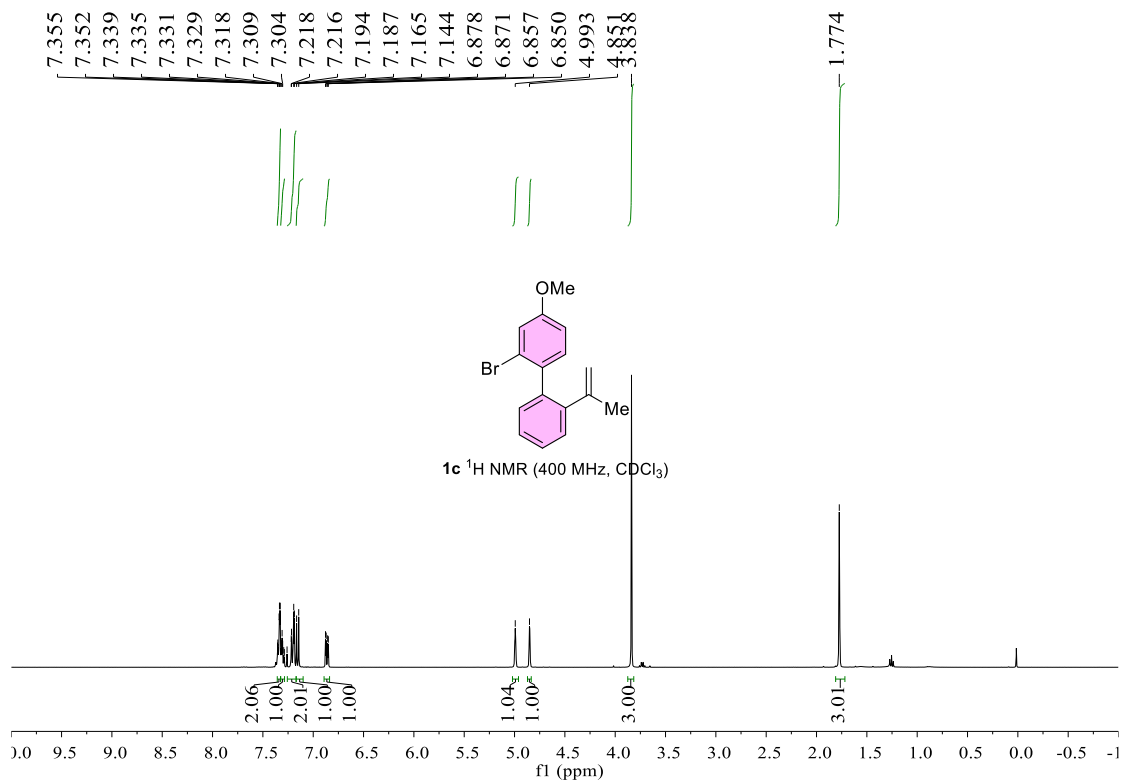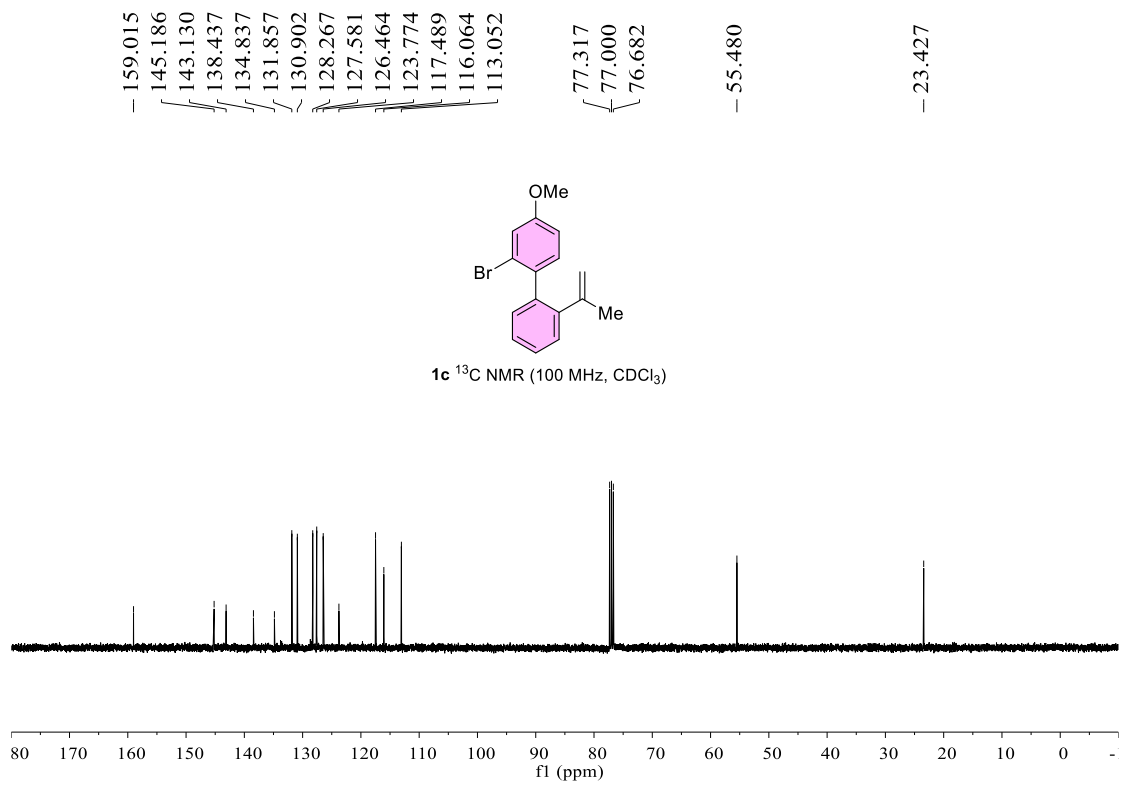

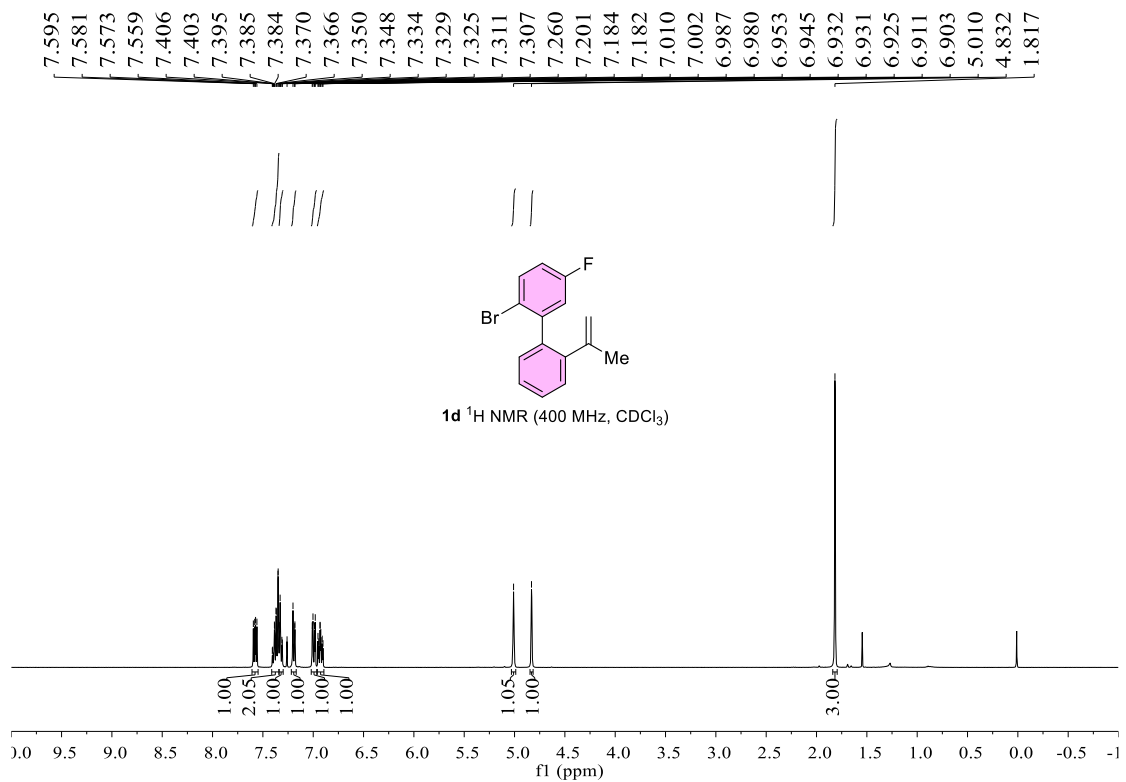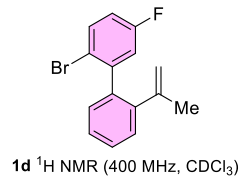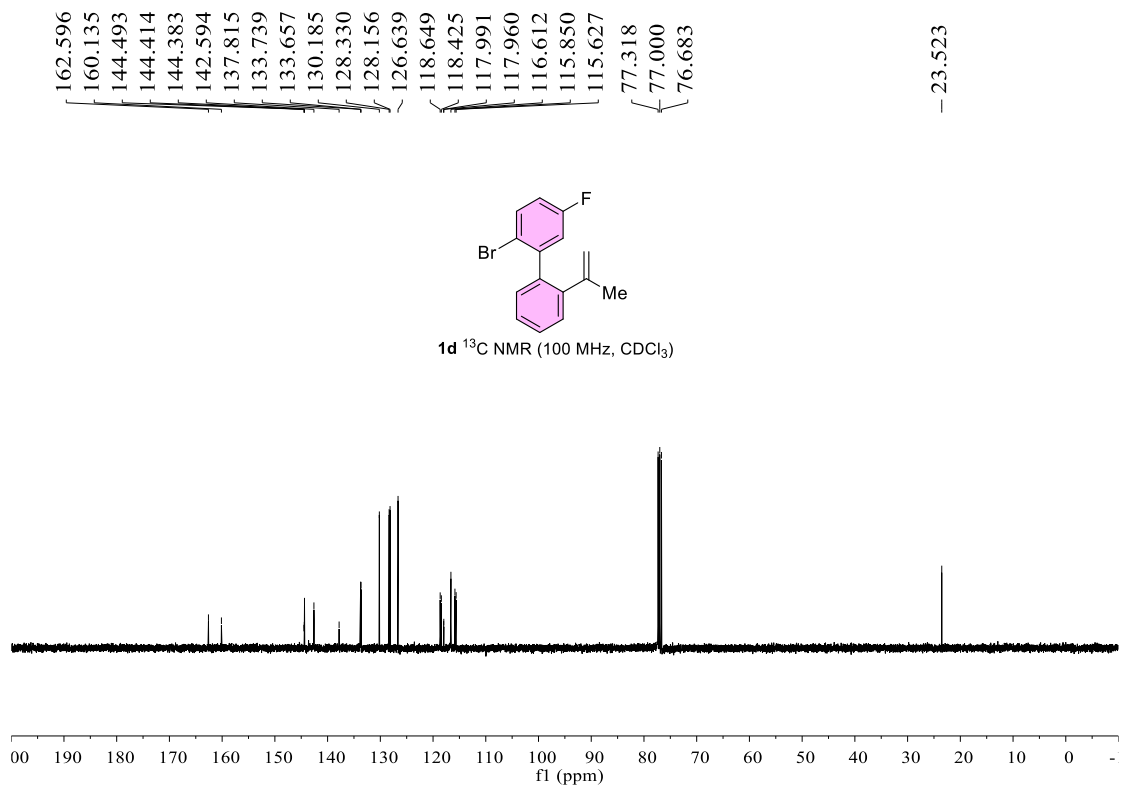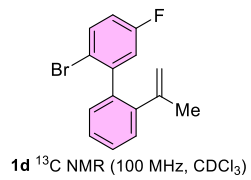

-115.691

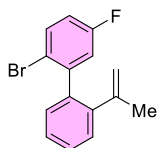

**1d**  $^{19}\text{F}$  NMR (376 MHz,  $\text{CDCl}_3$ )

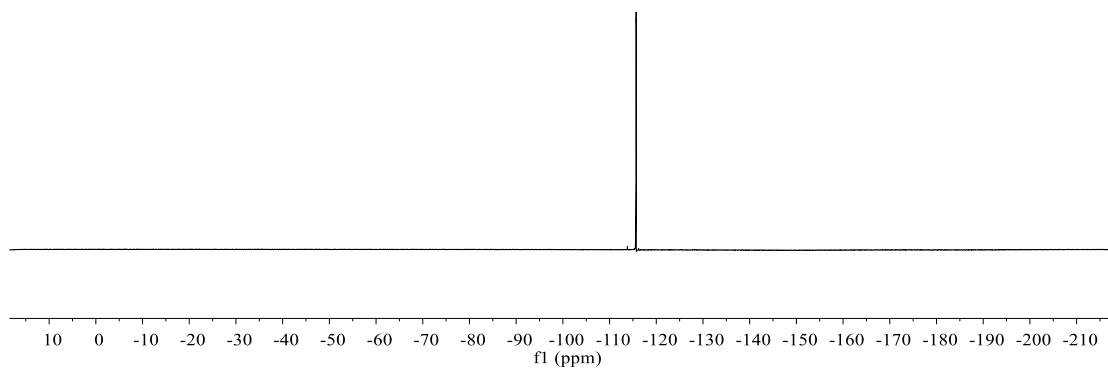

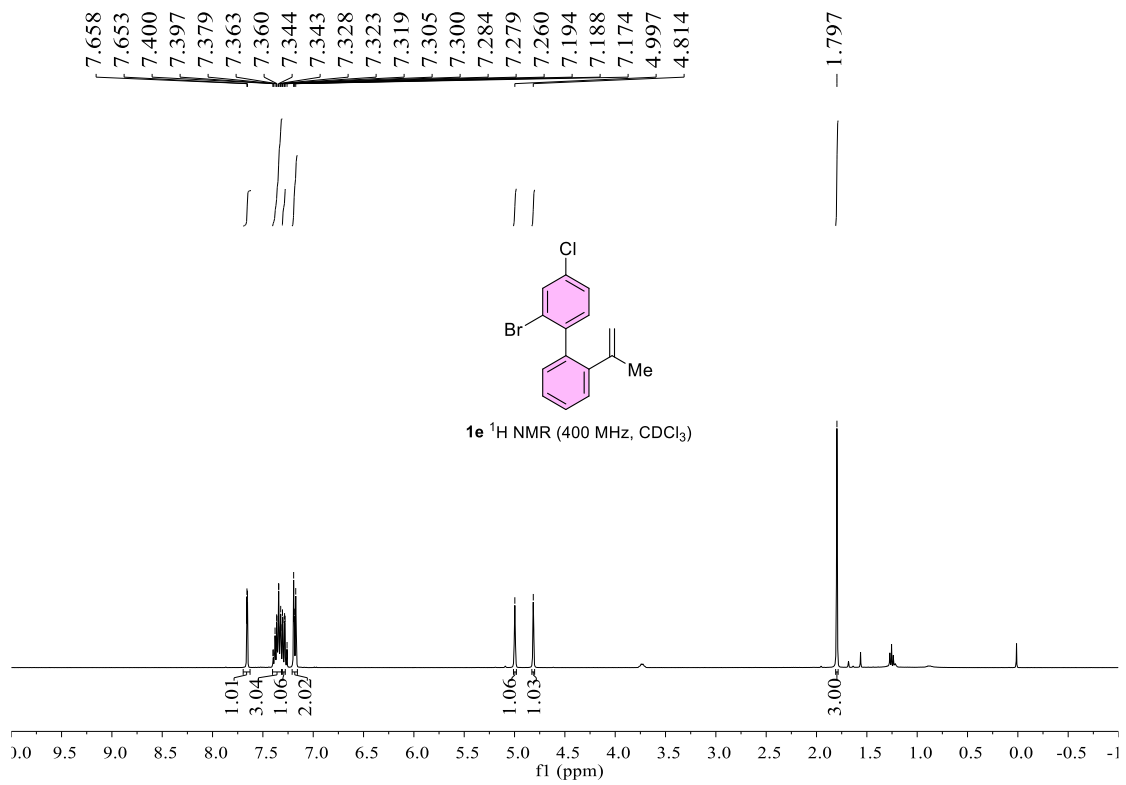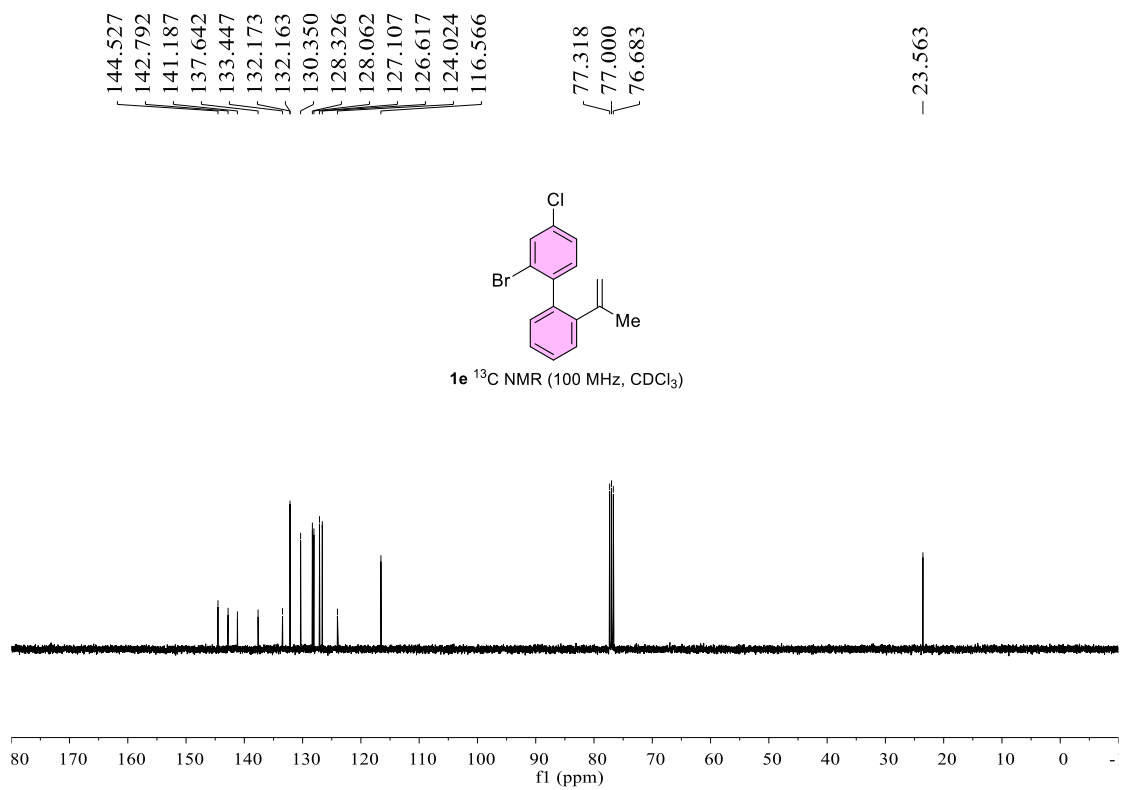

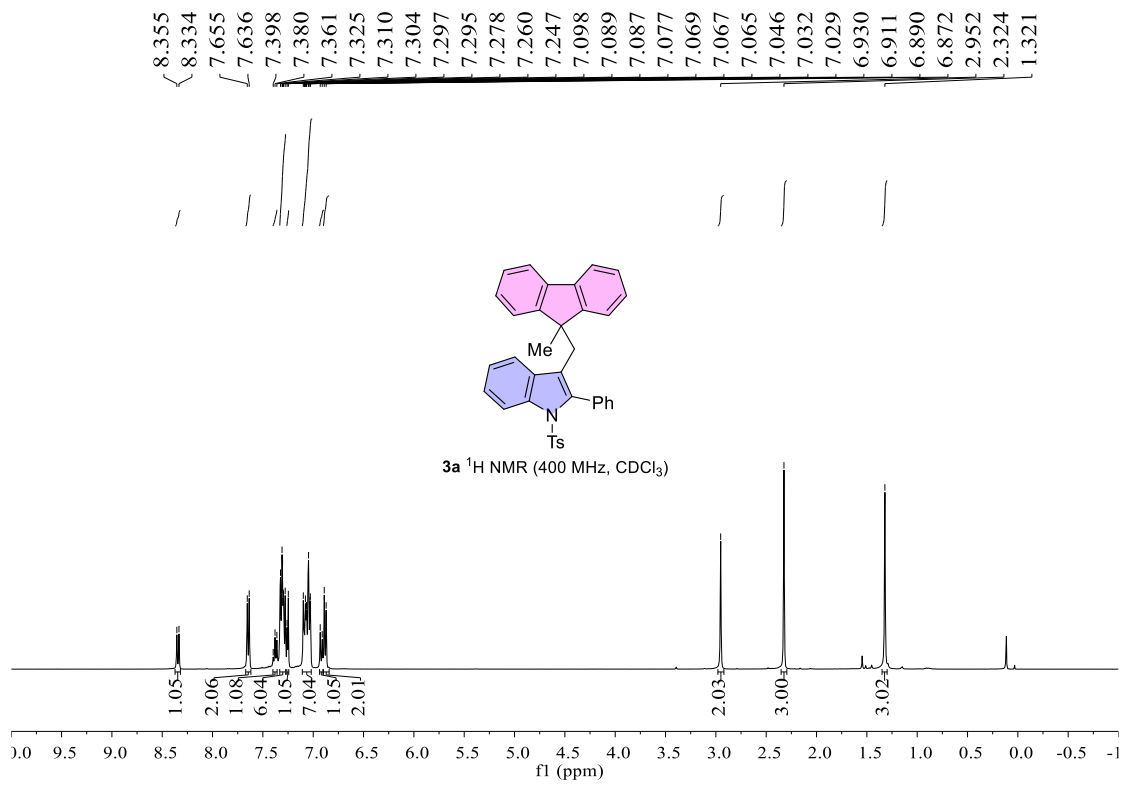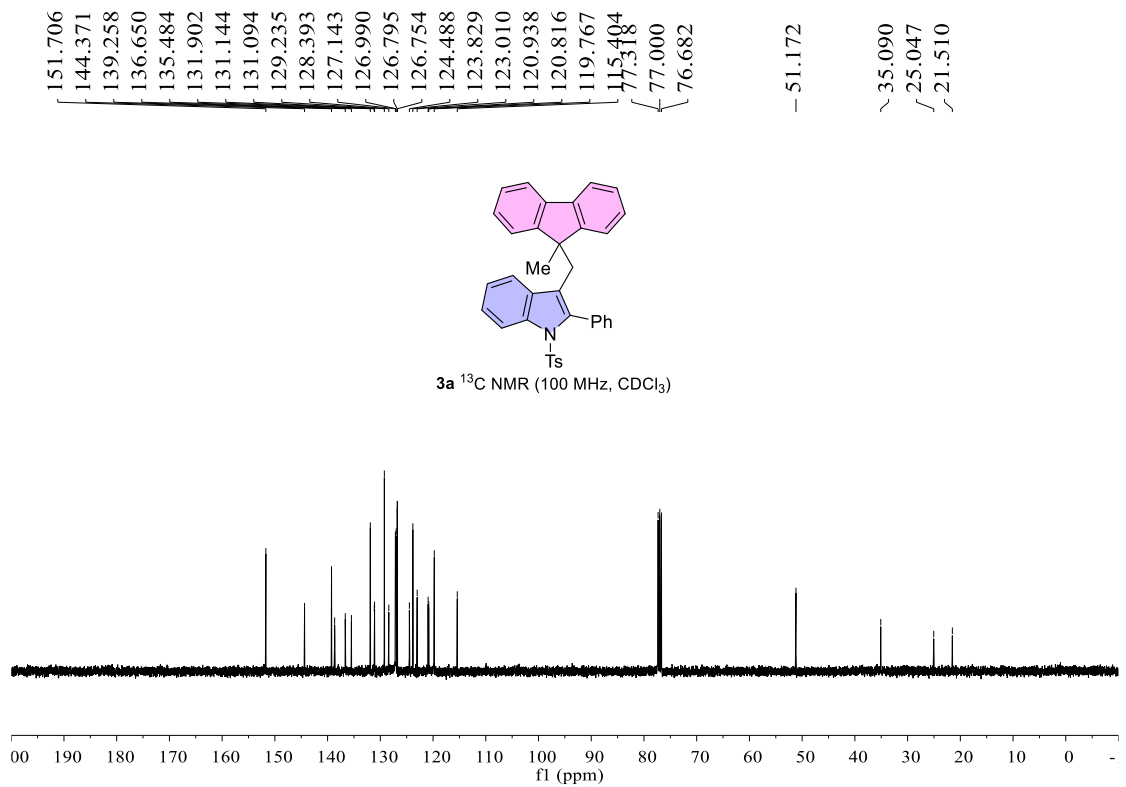

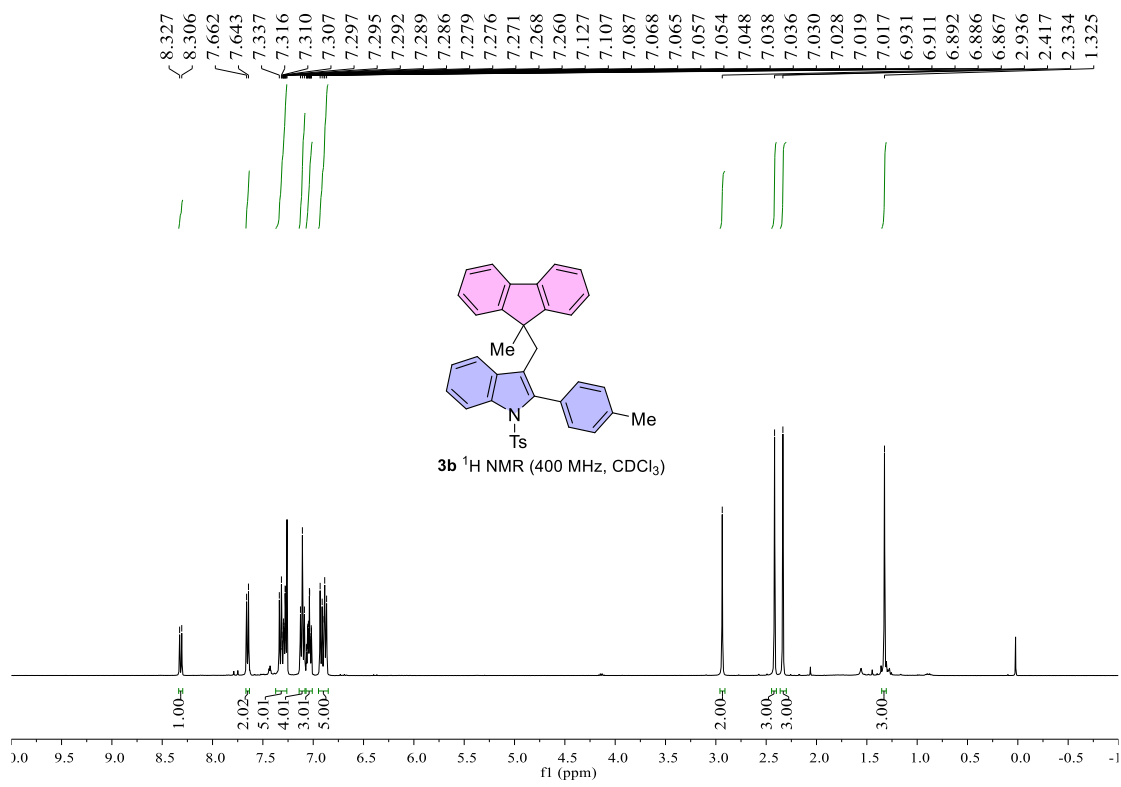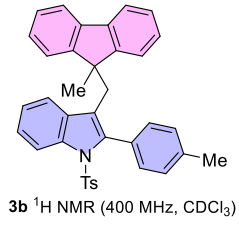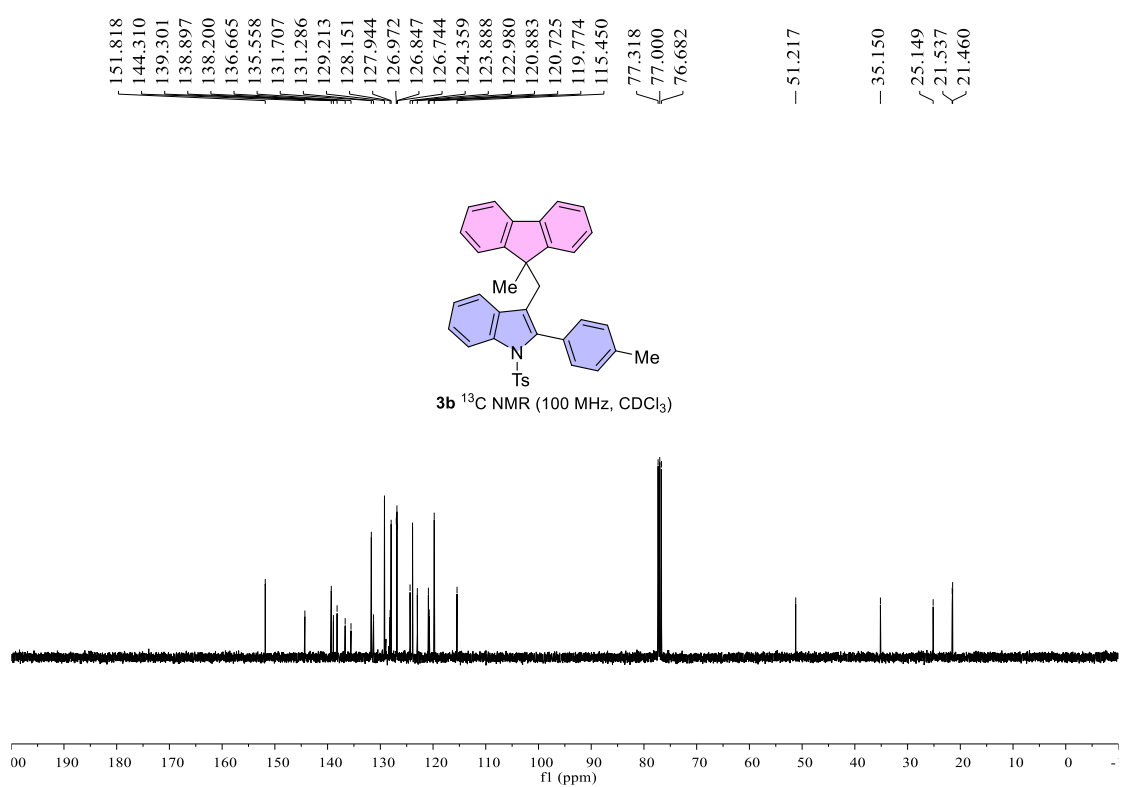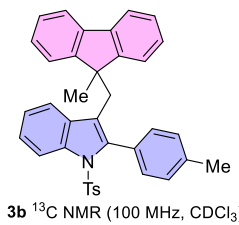

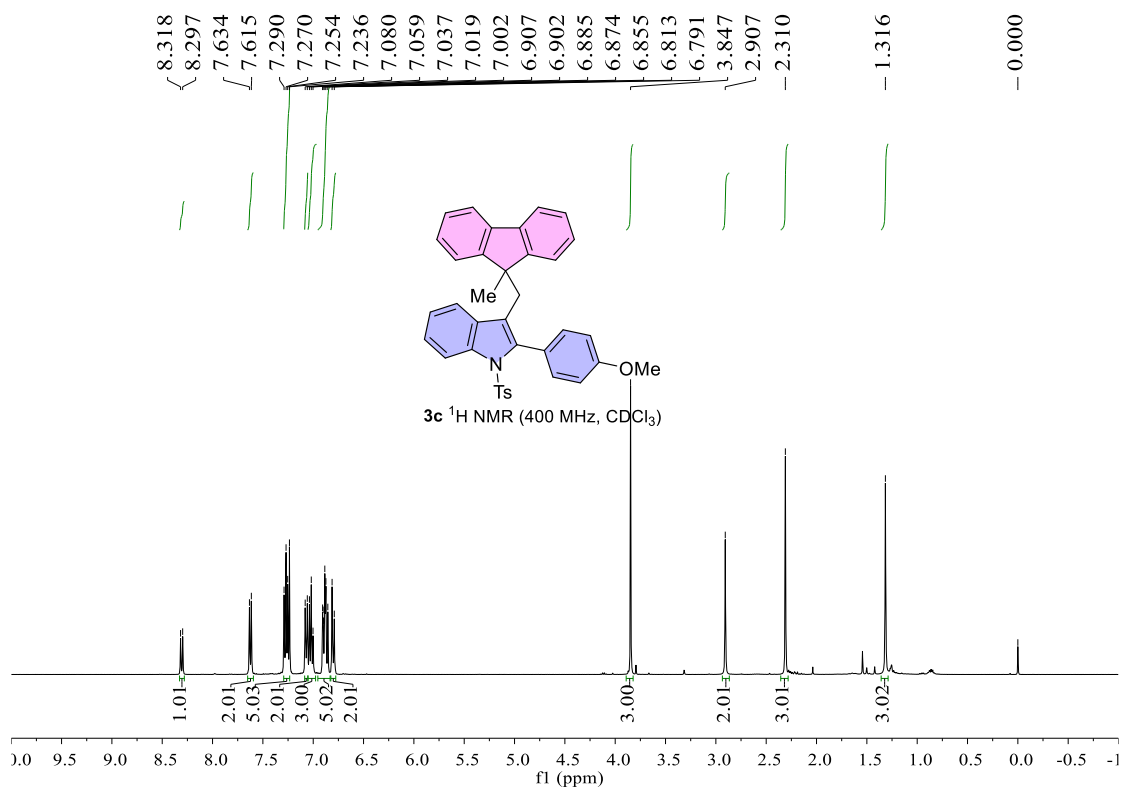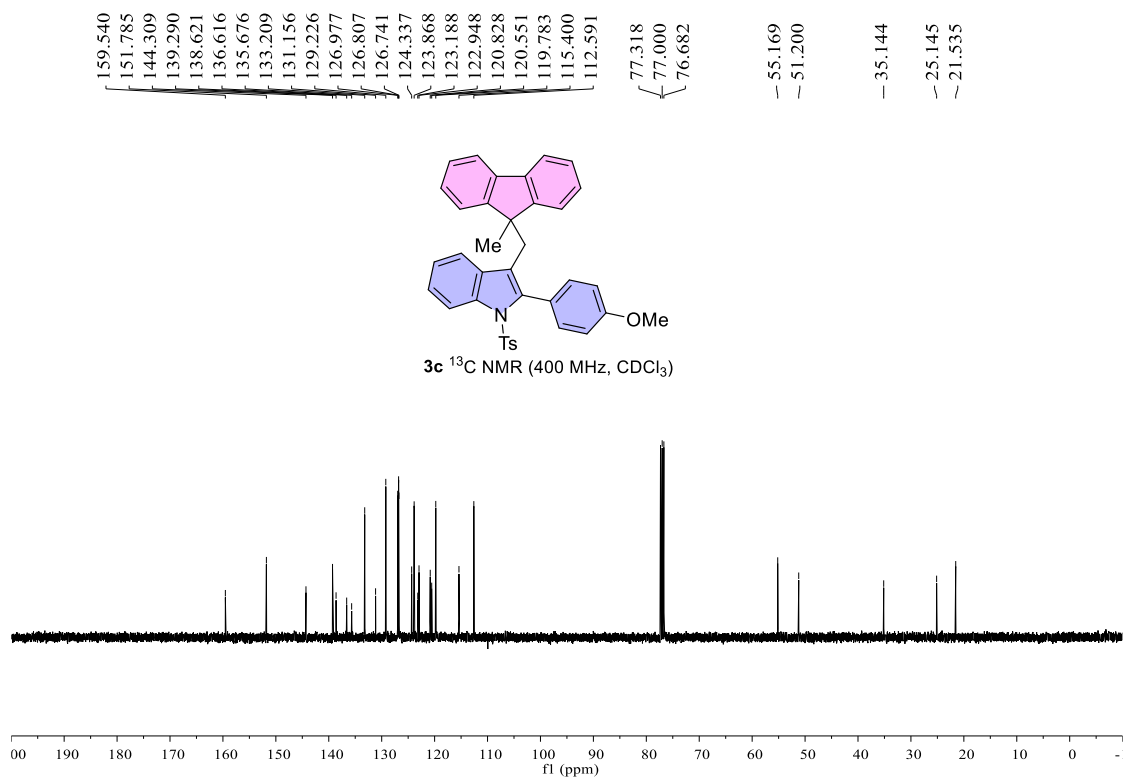

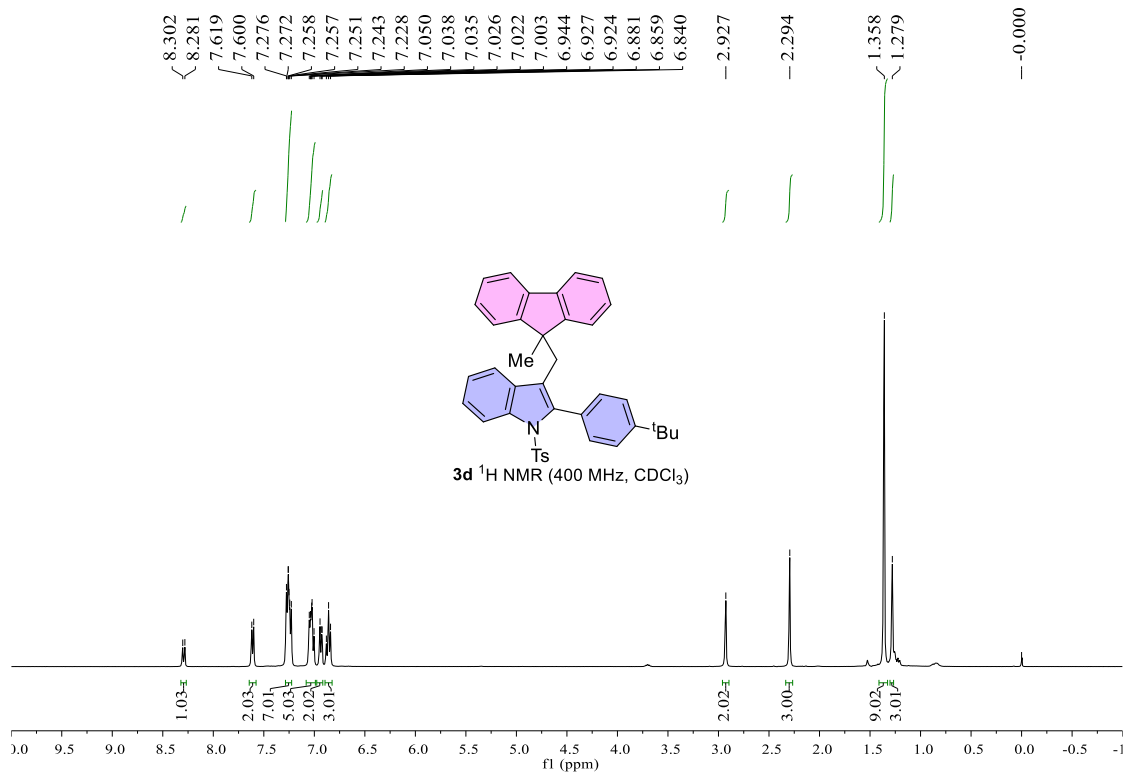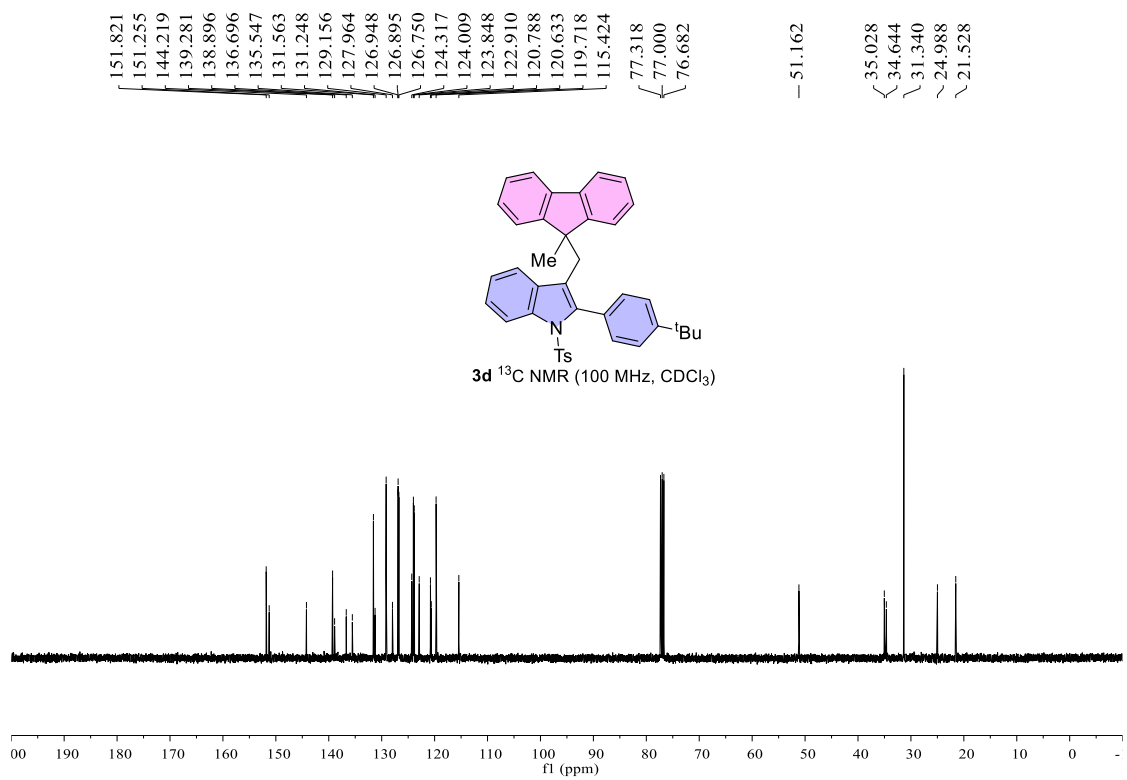

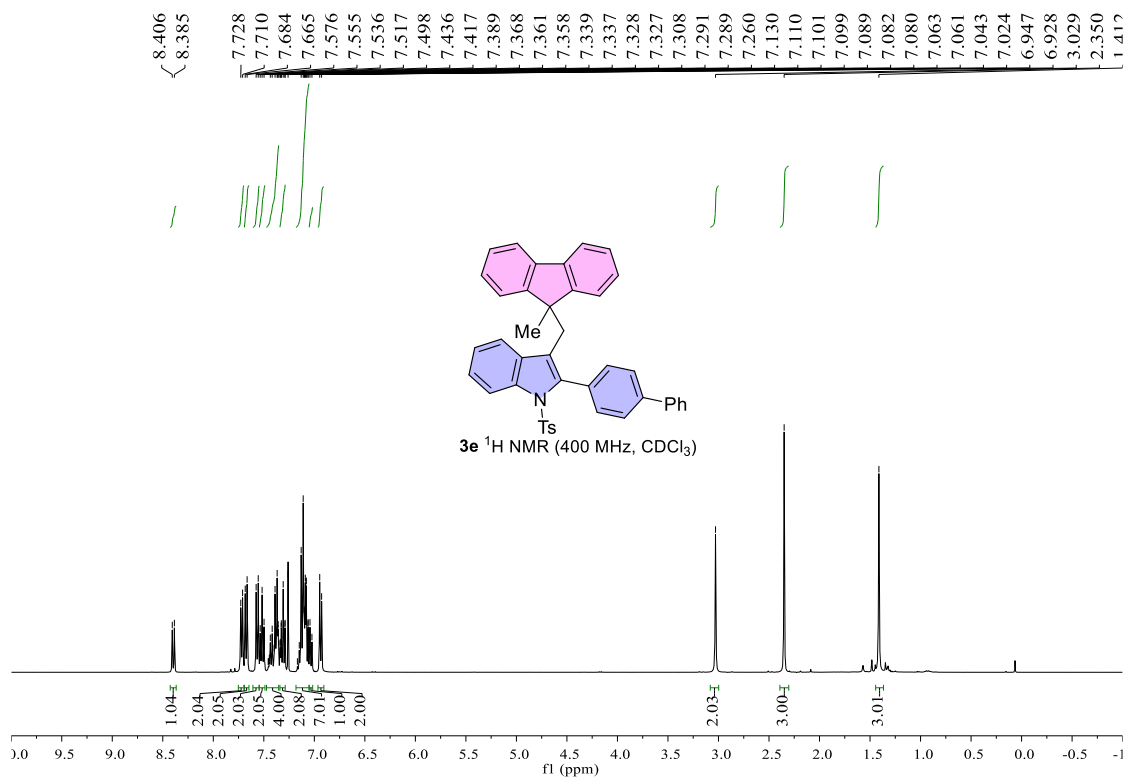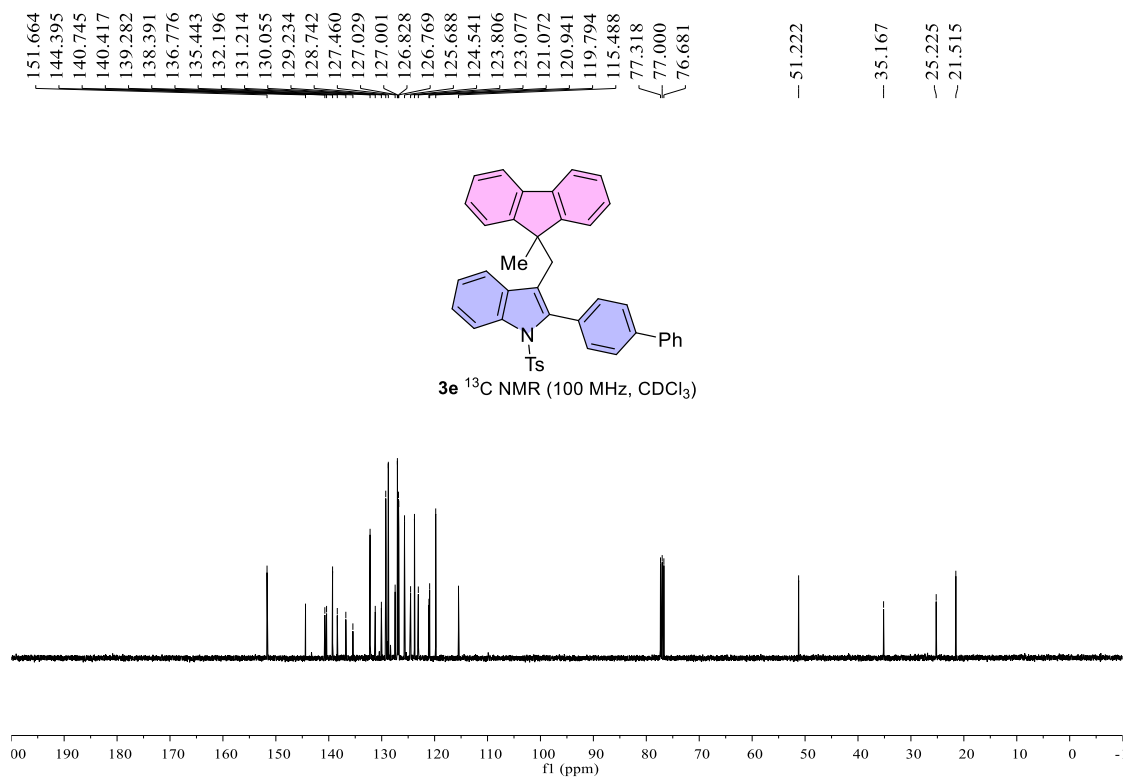

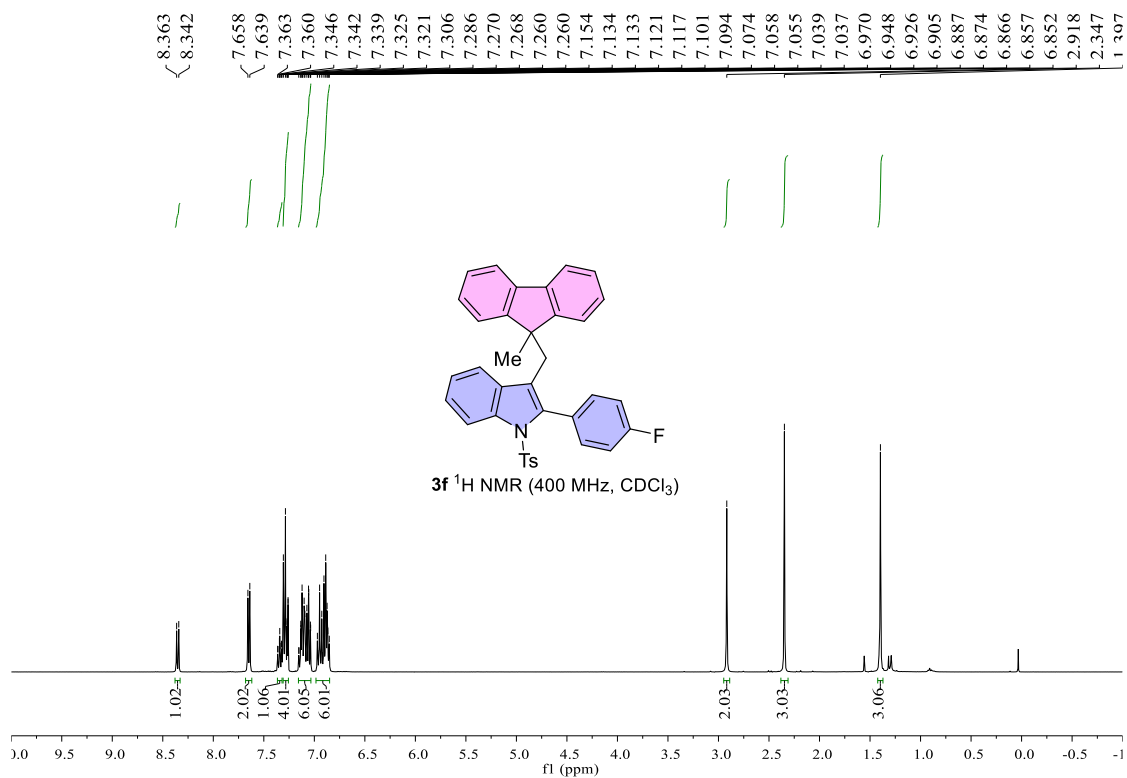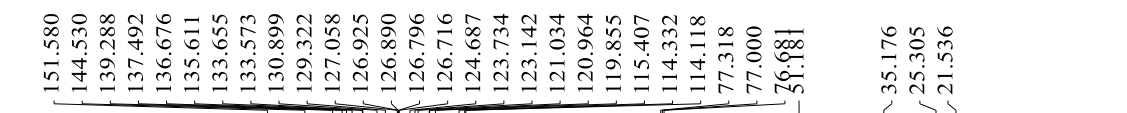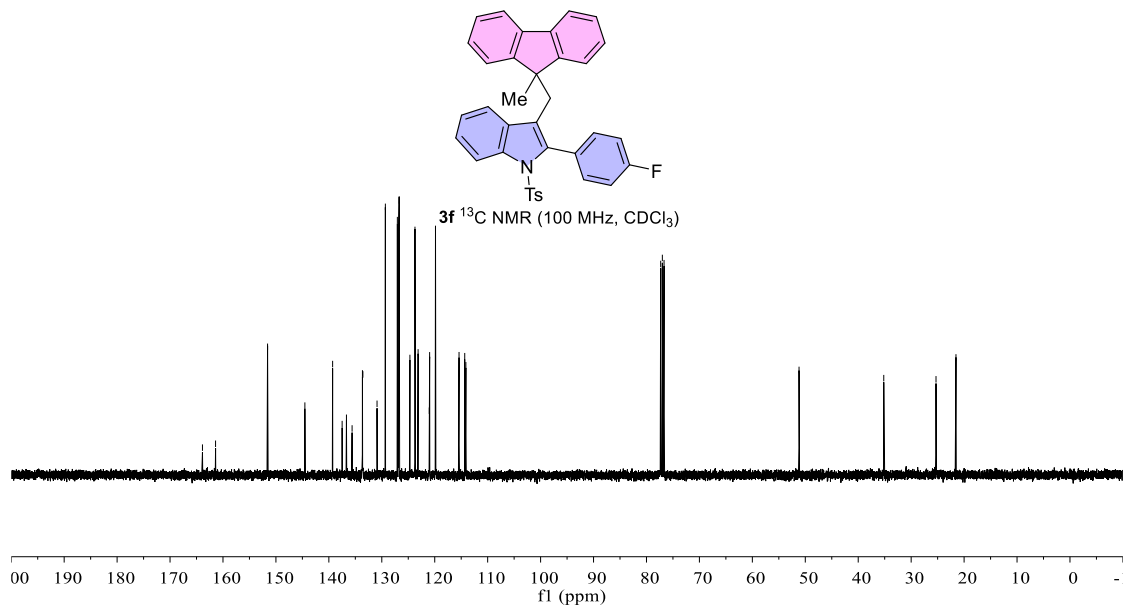

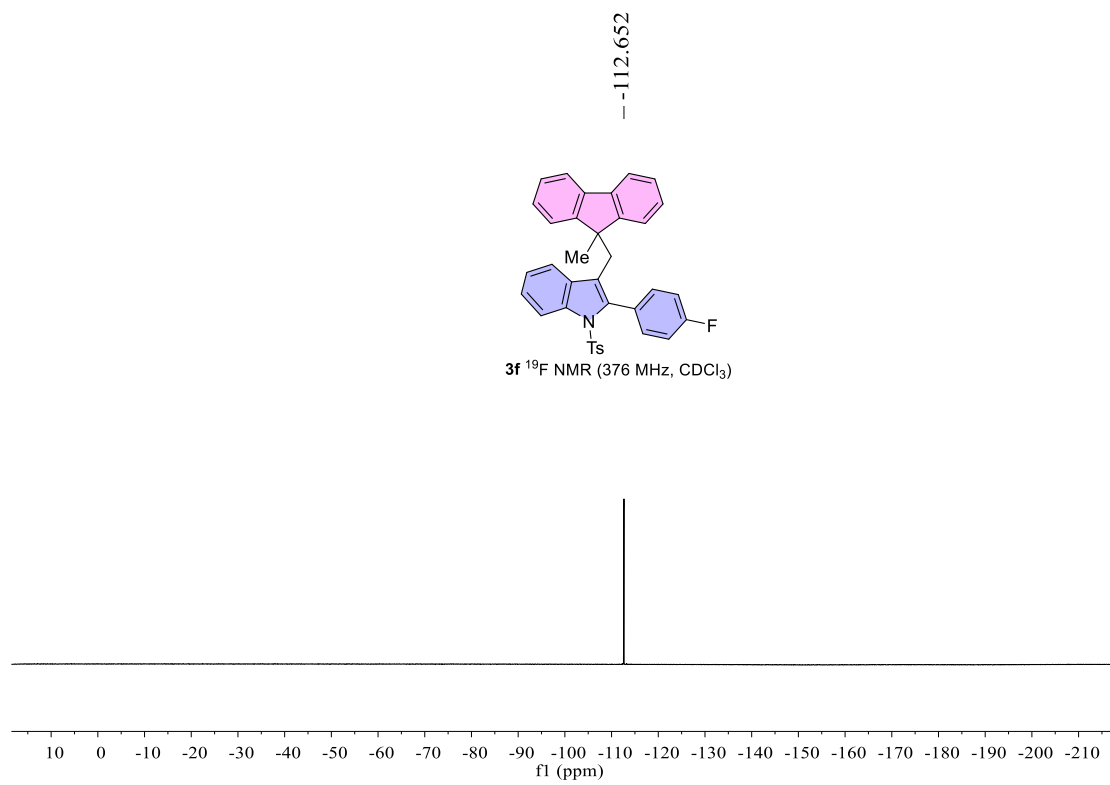





-62.493

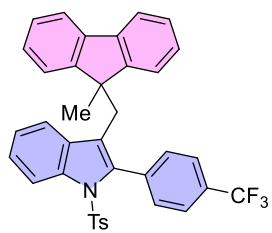

**3h**  $^{19}\text{F}$  NMR (376 MHz,  $\text{CDCl}_3$ )

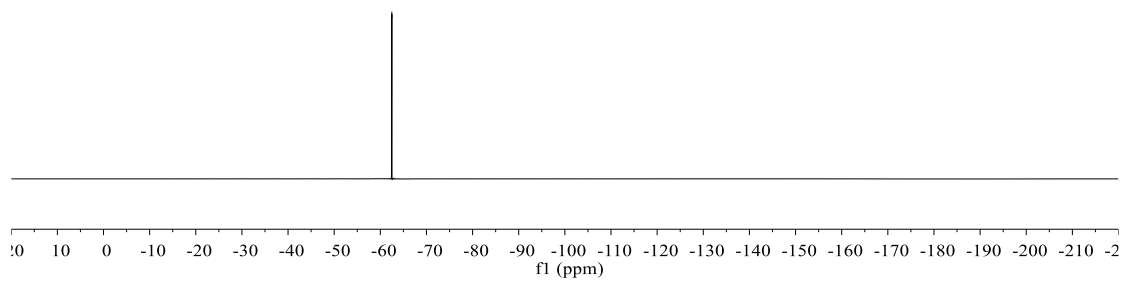

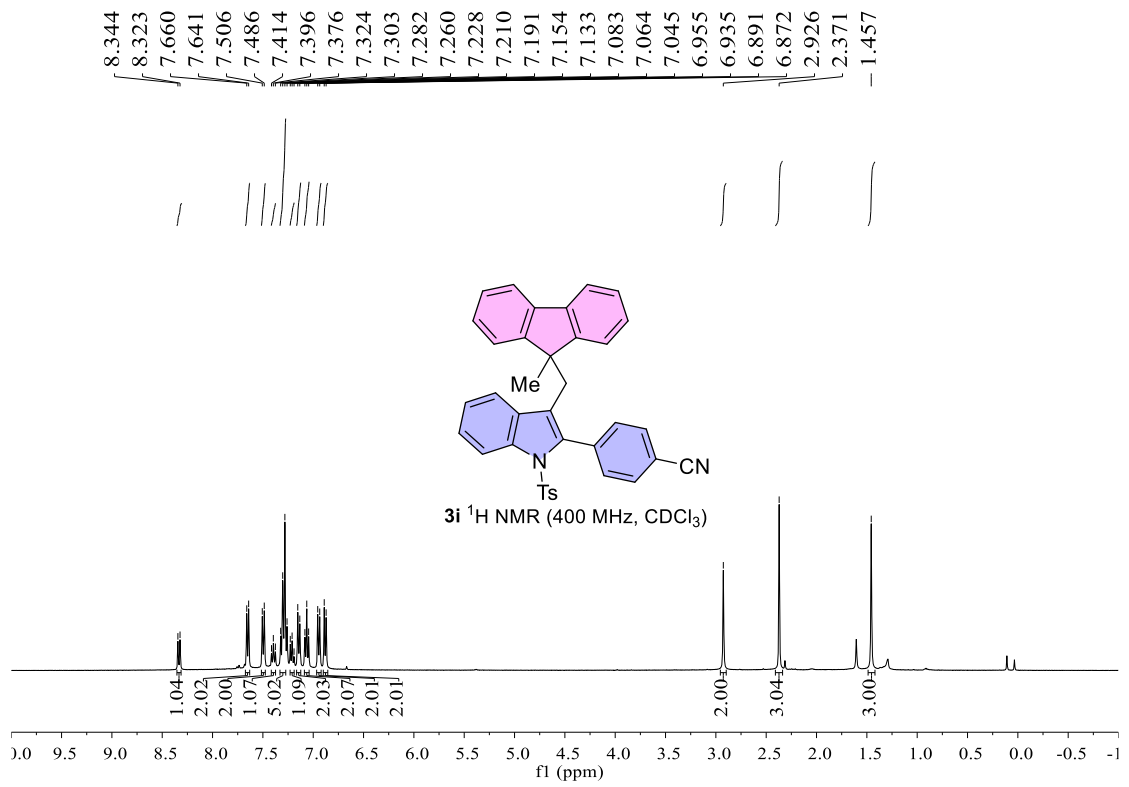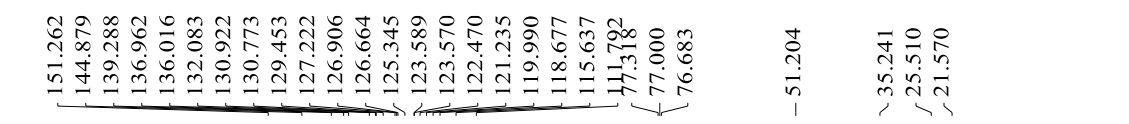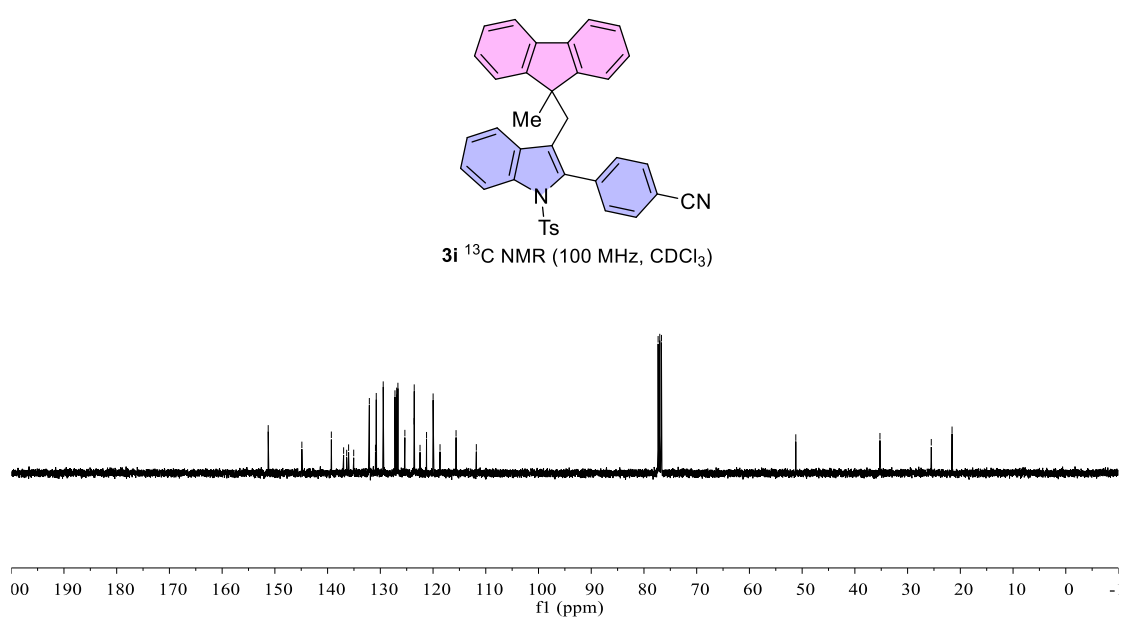

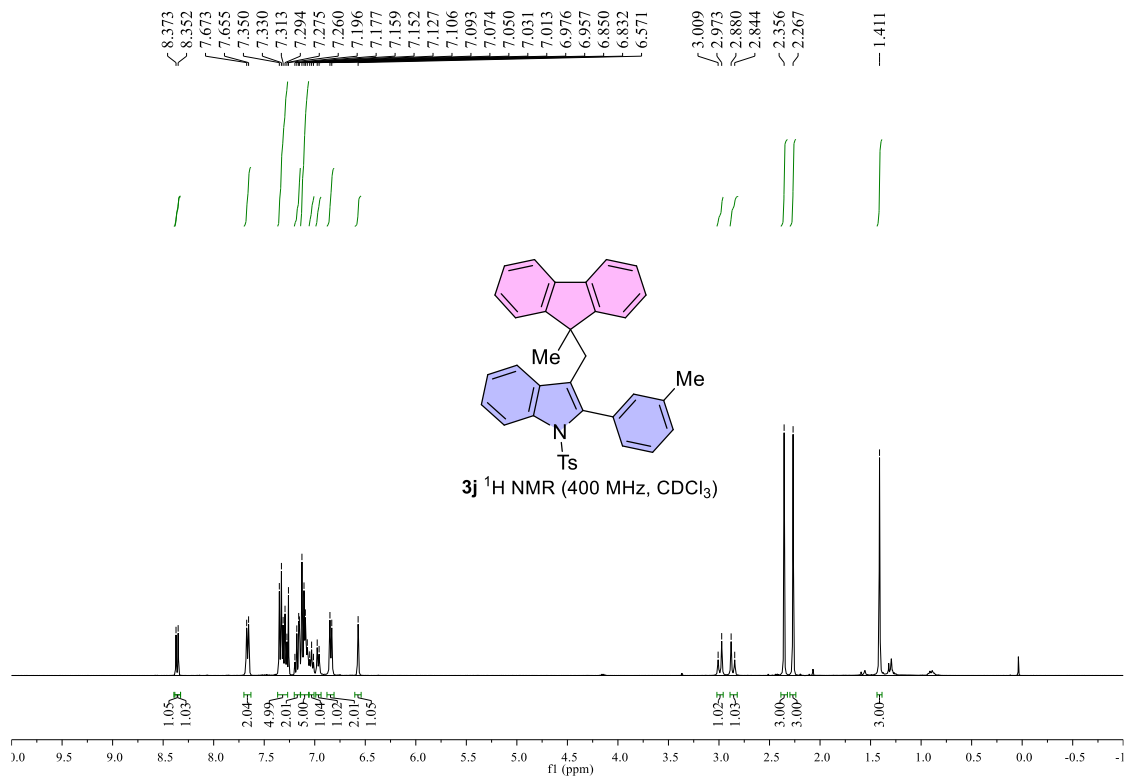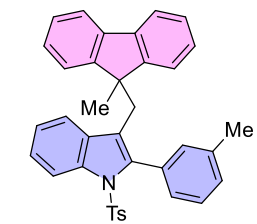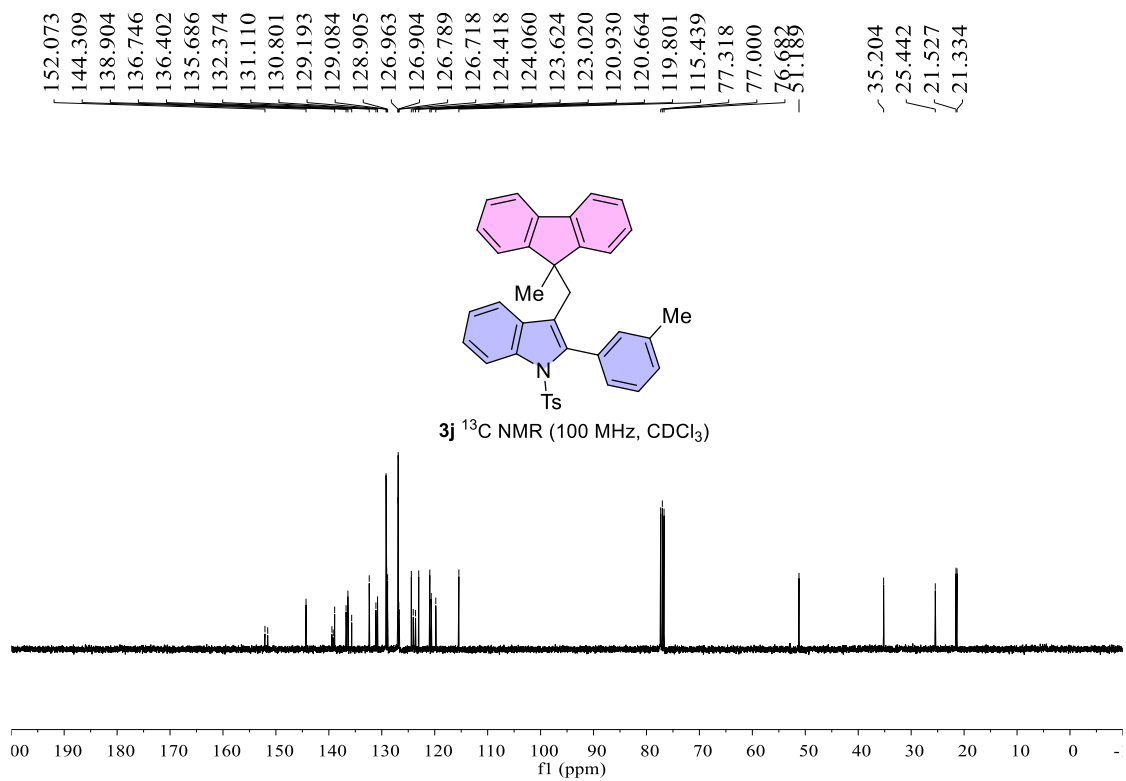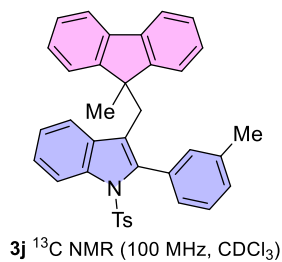

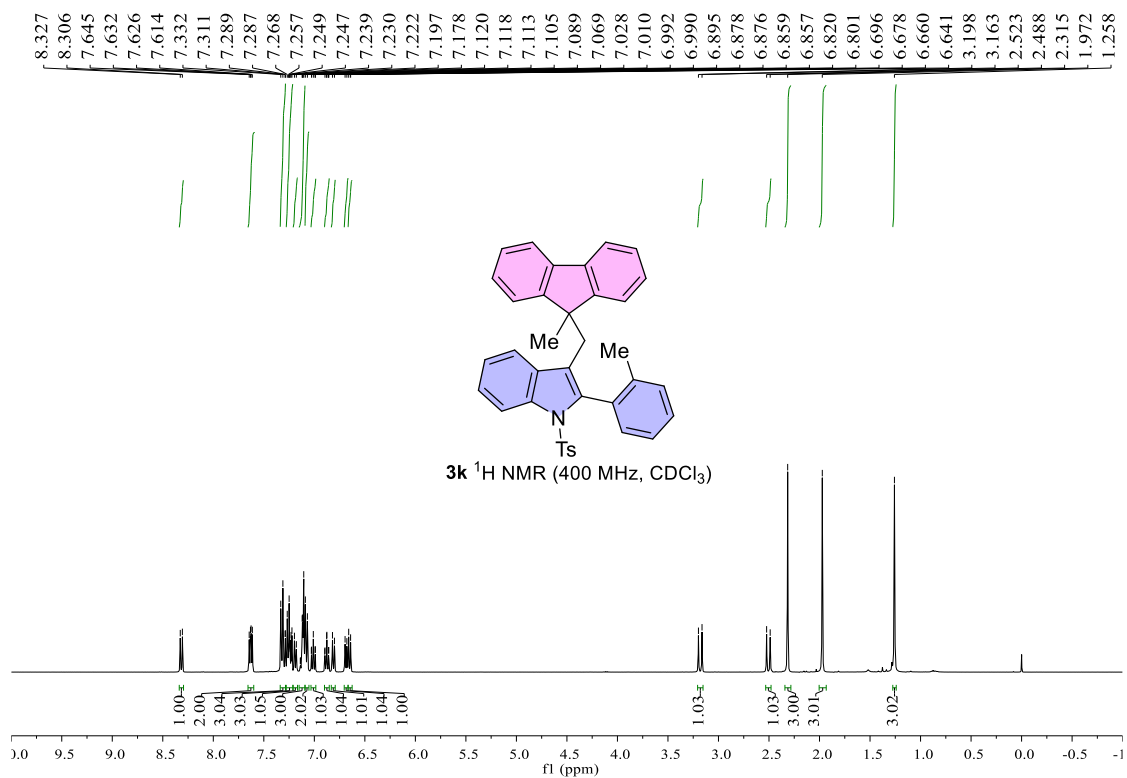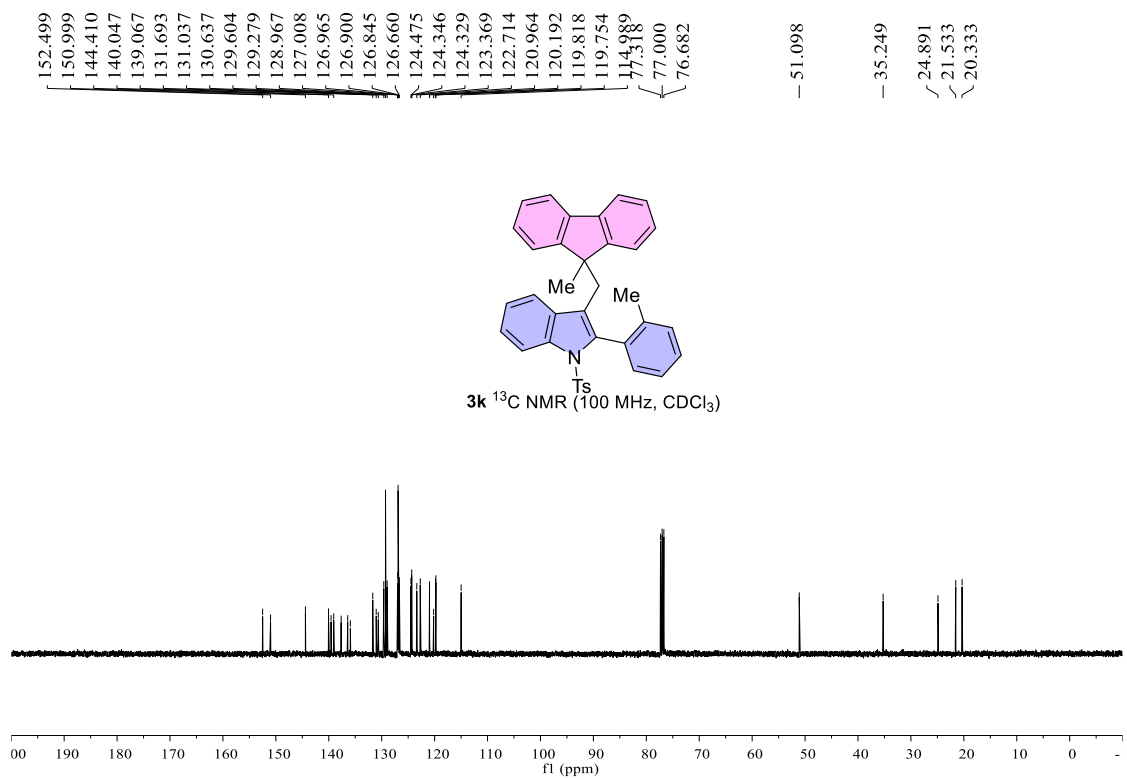

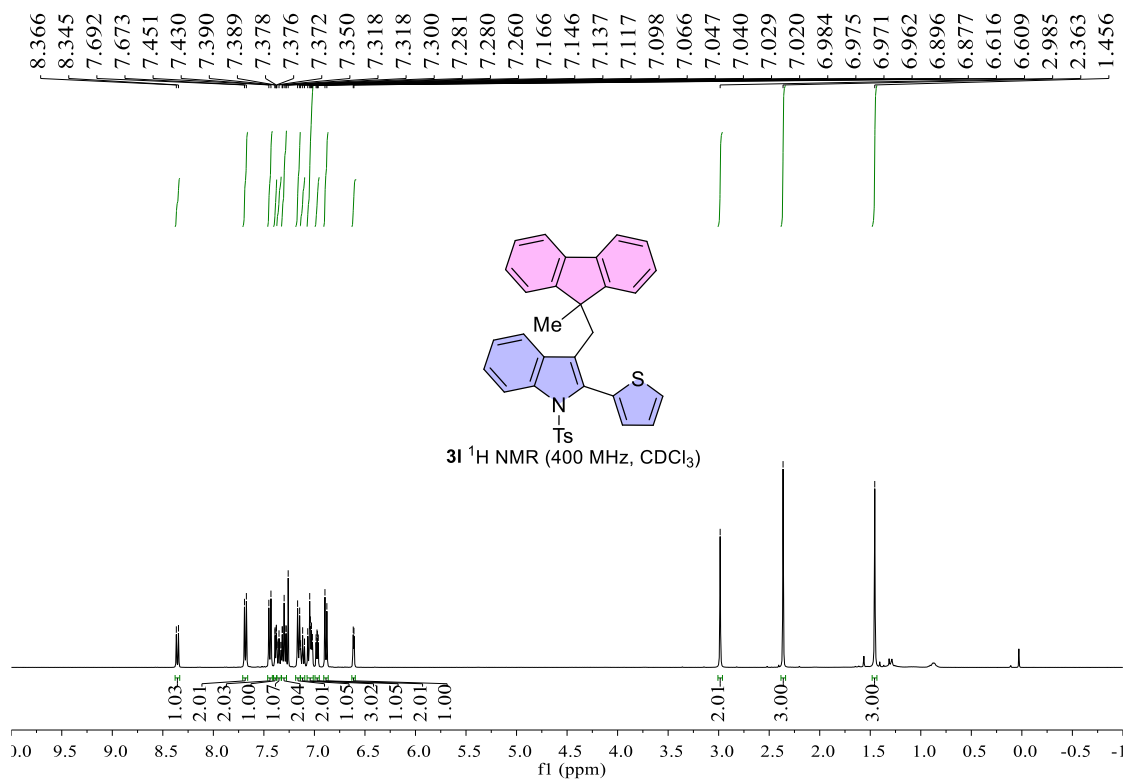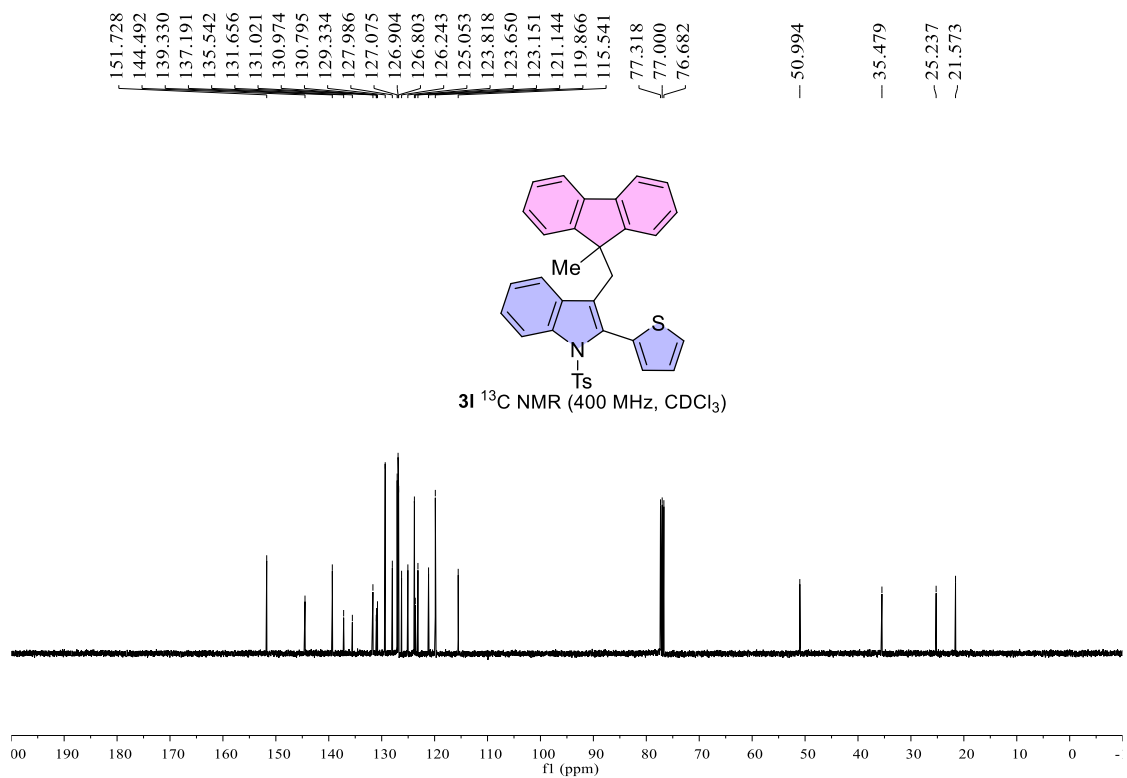

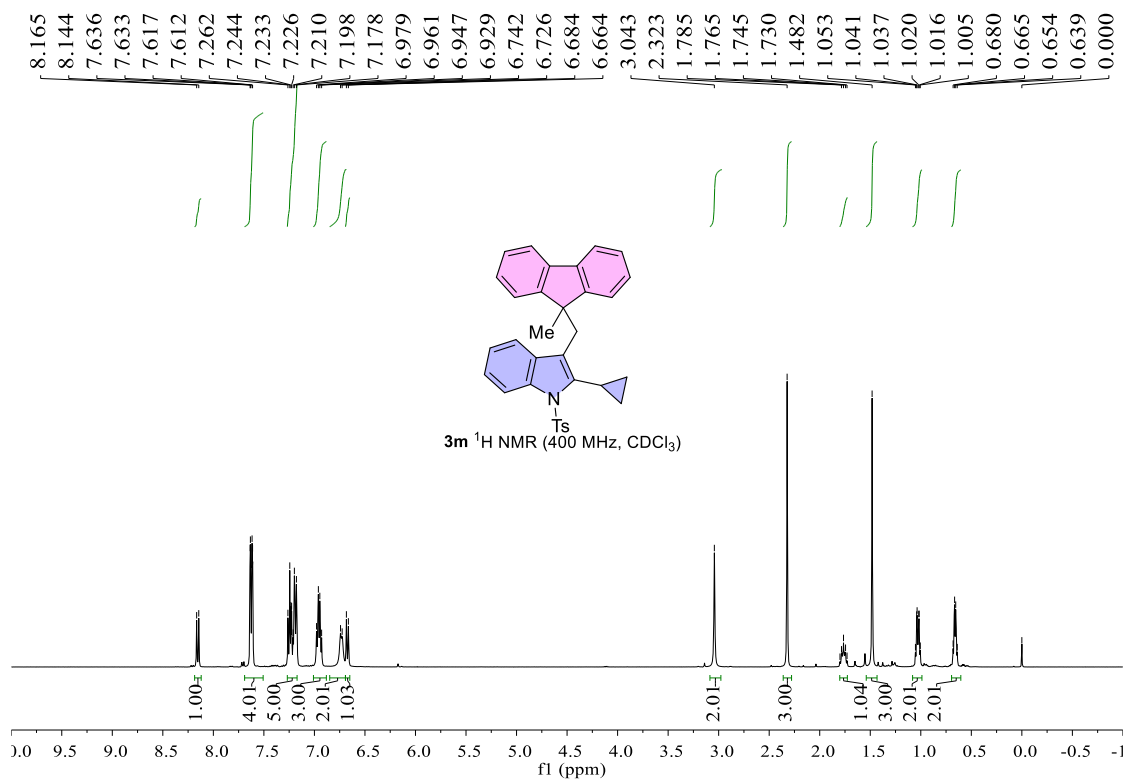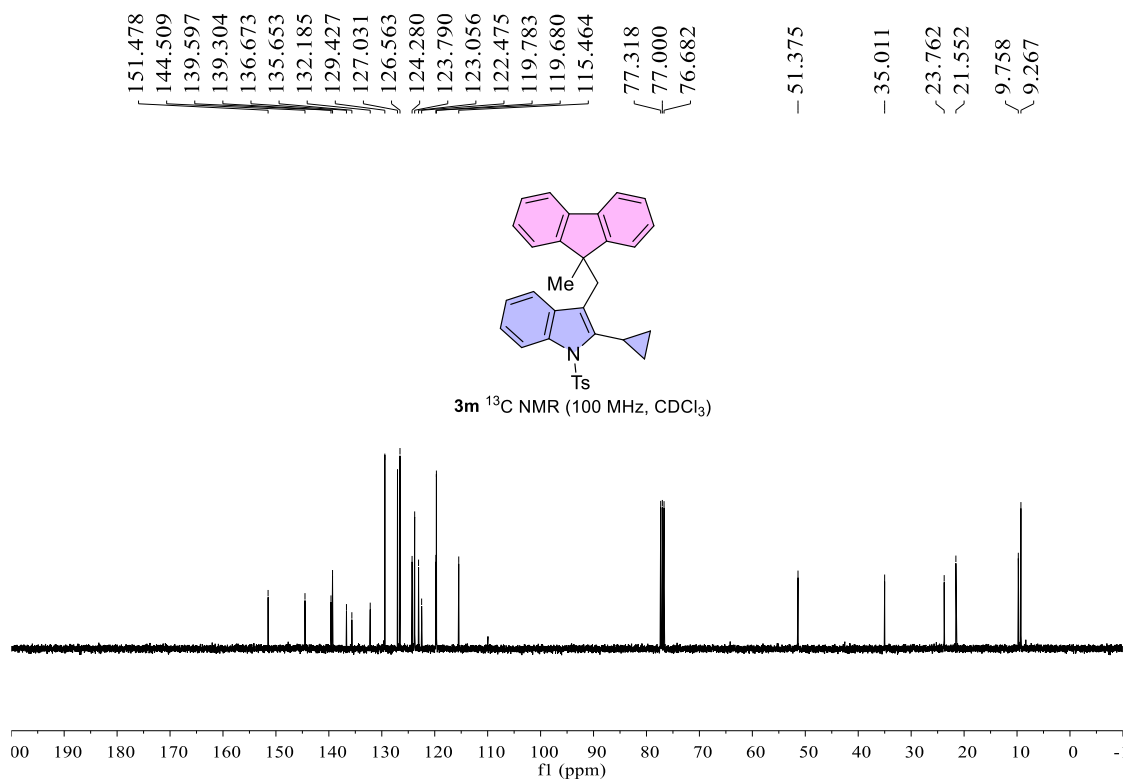

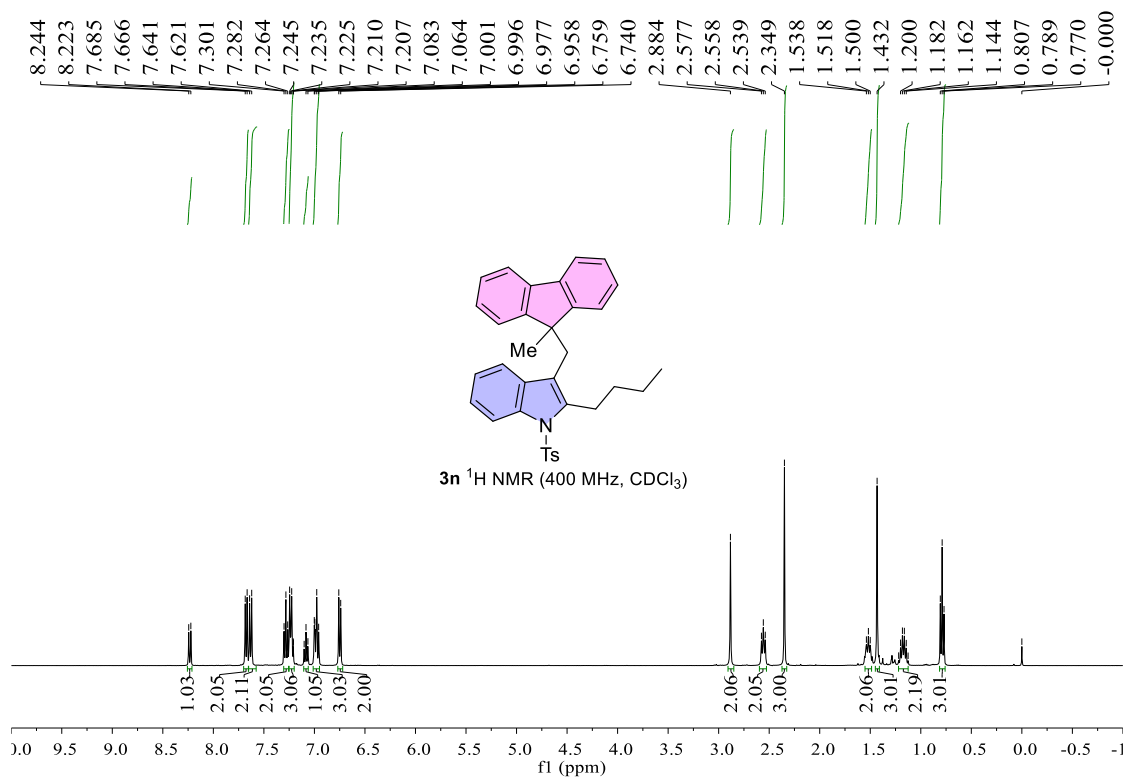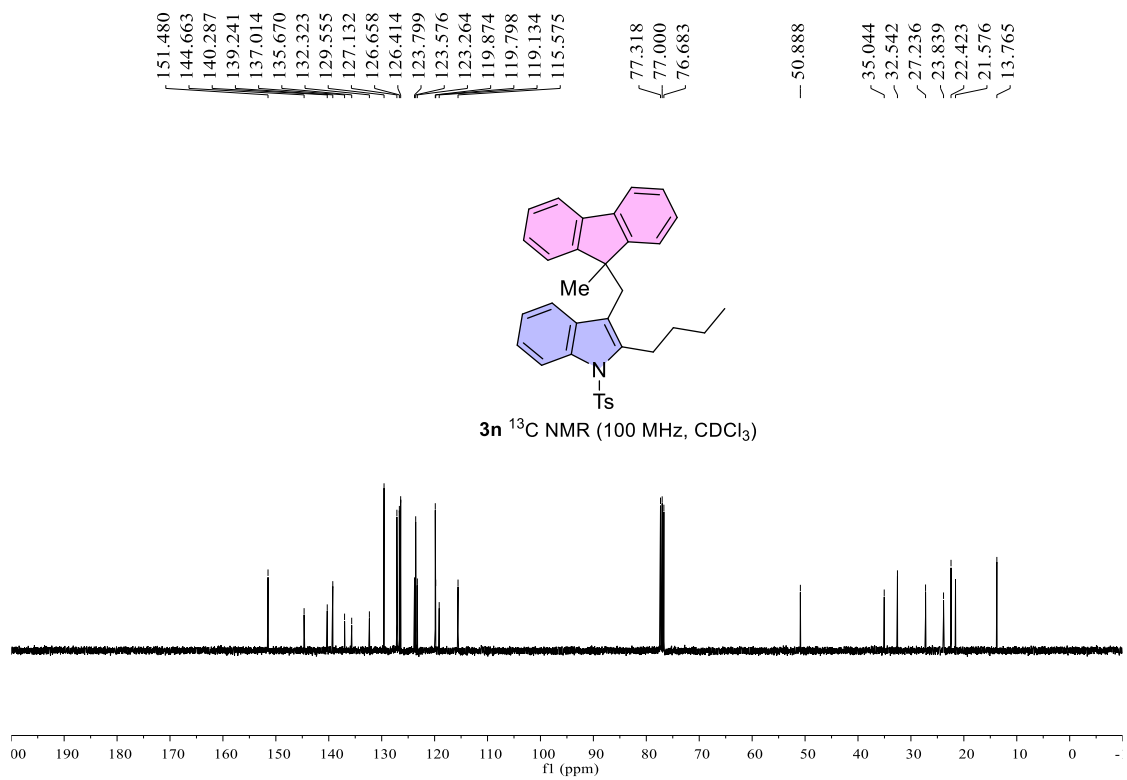

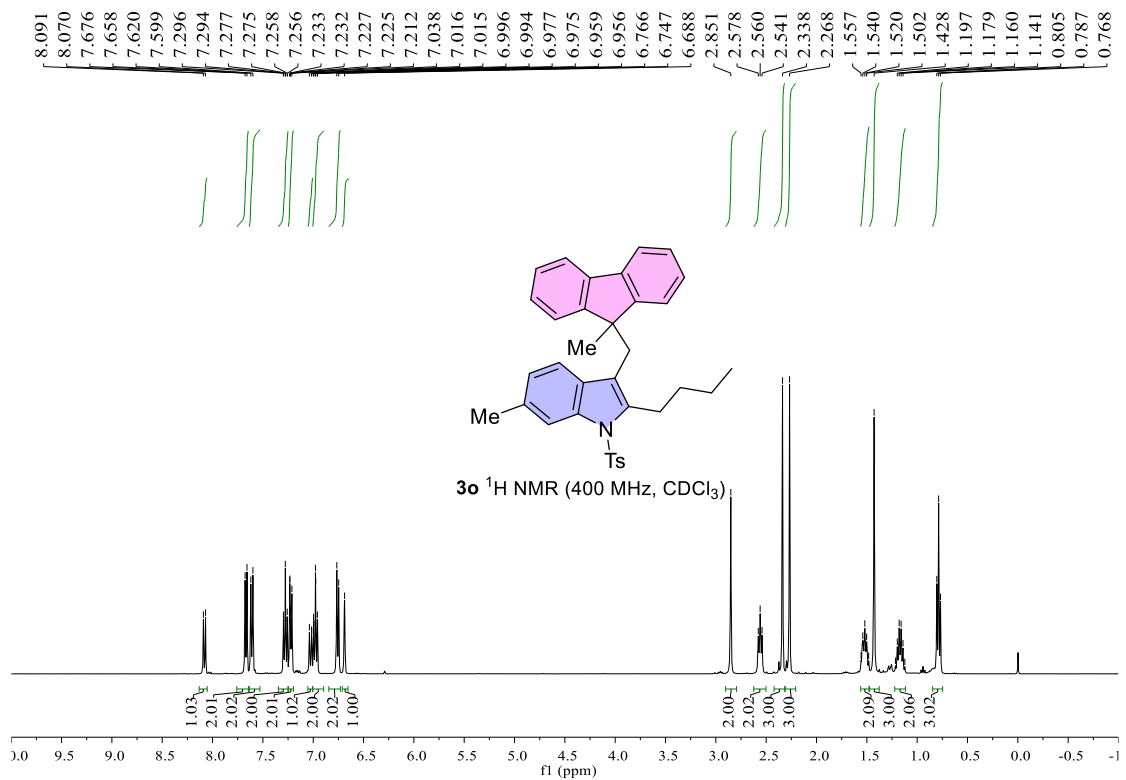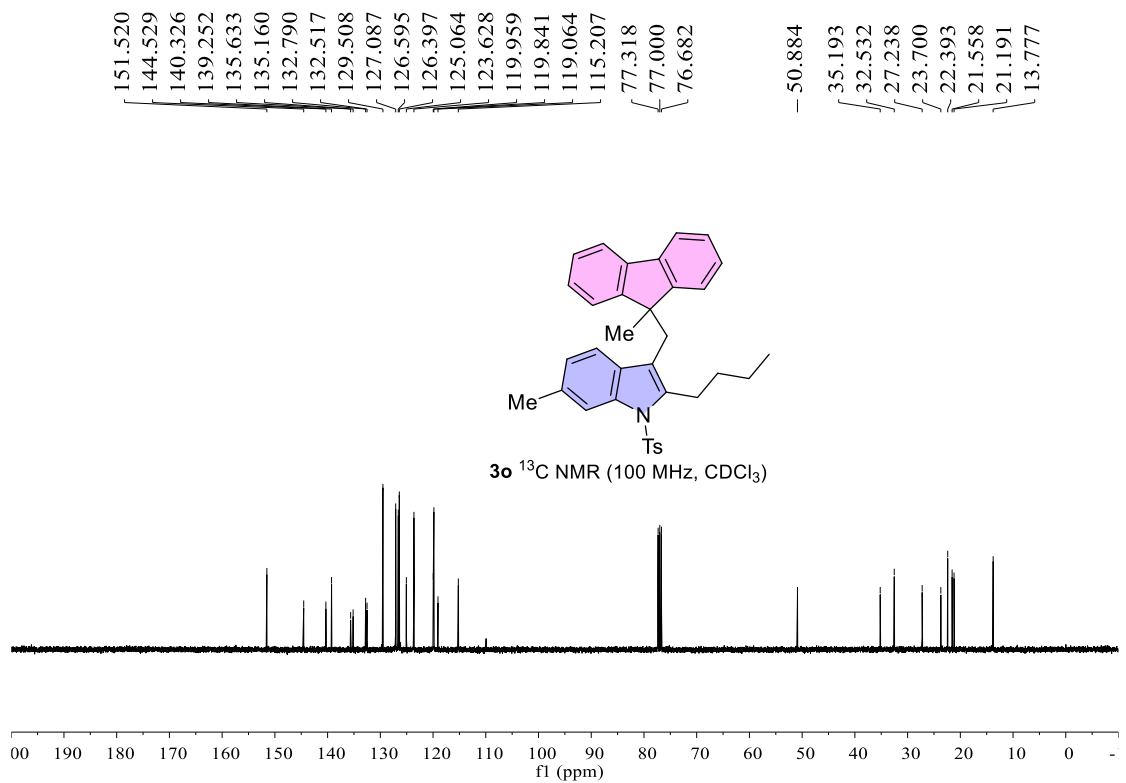

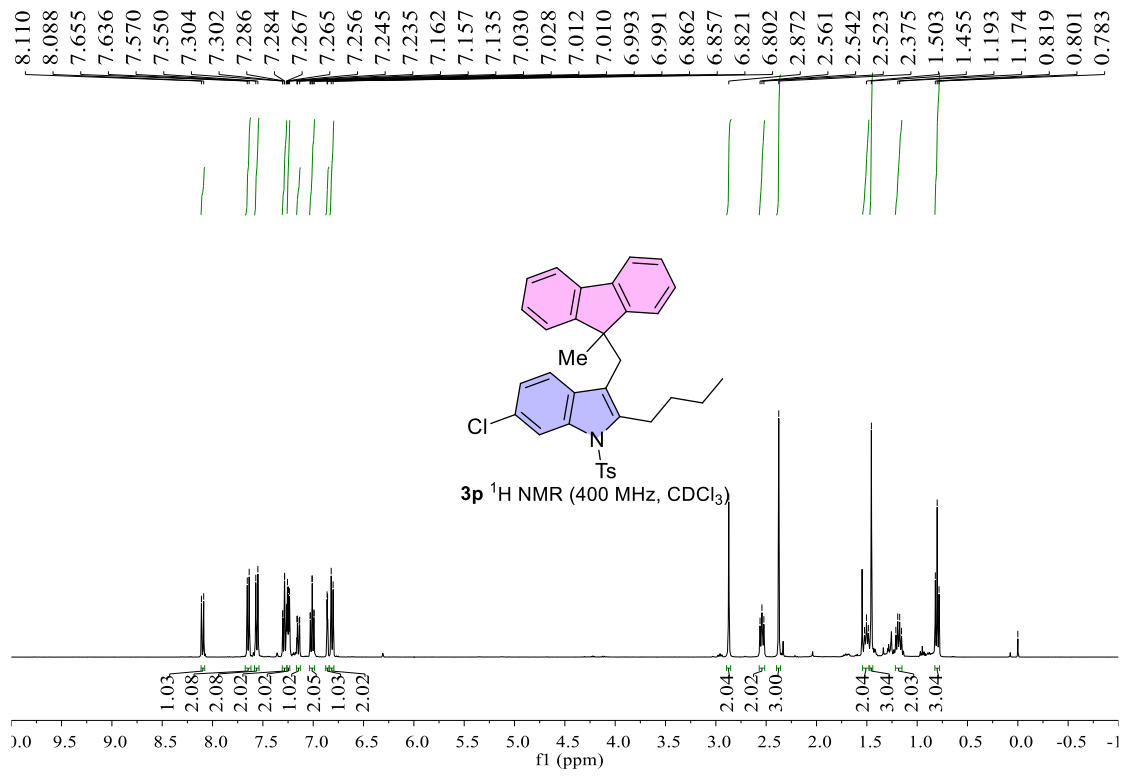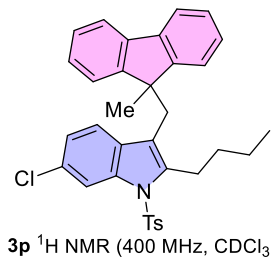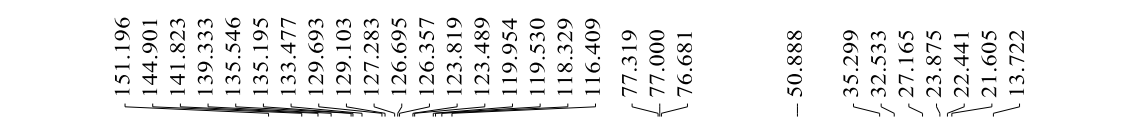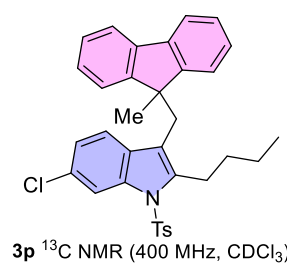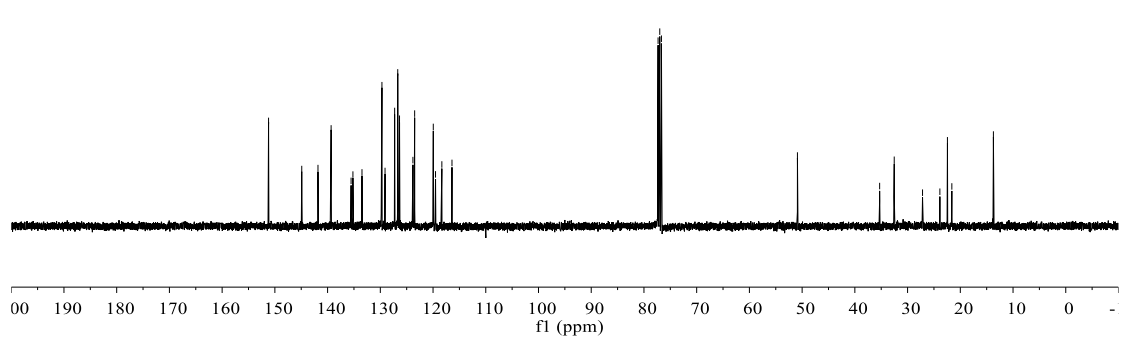

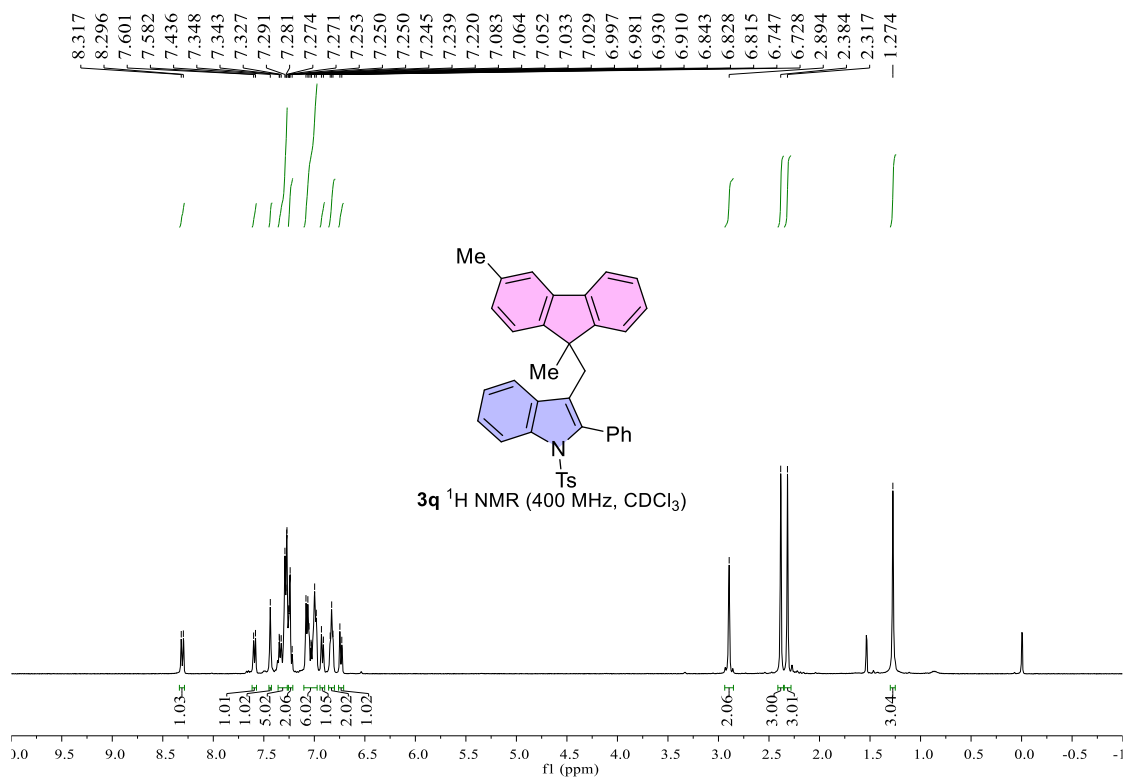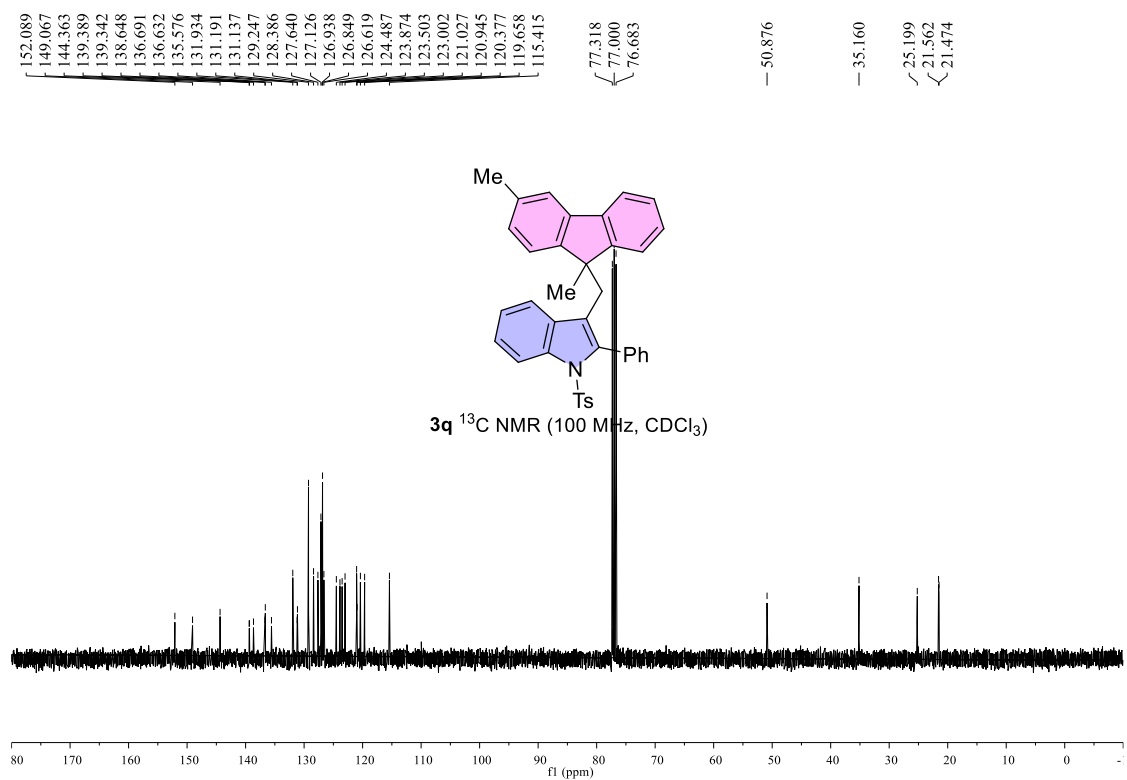

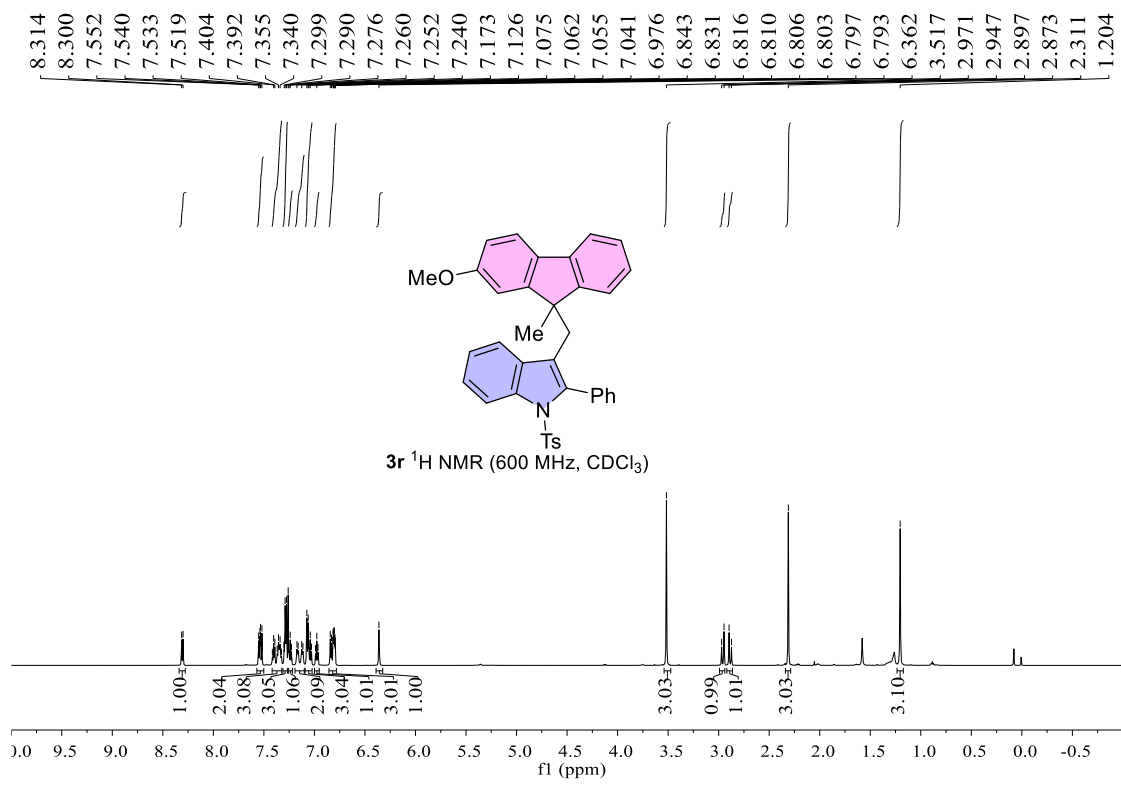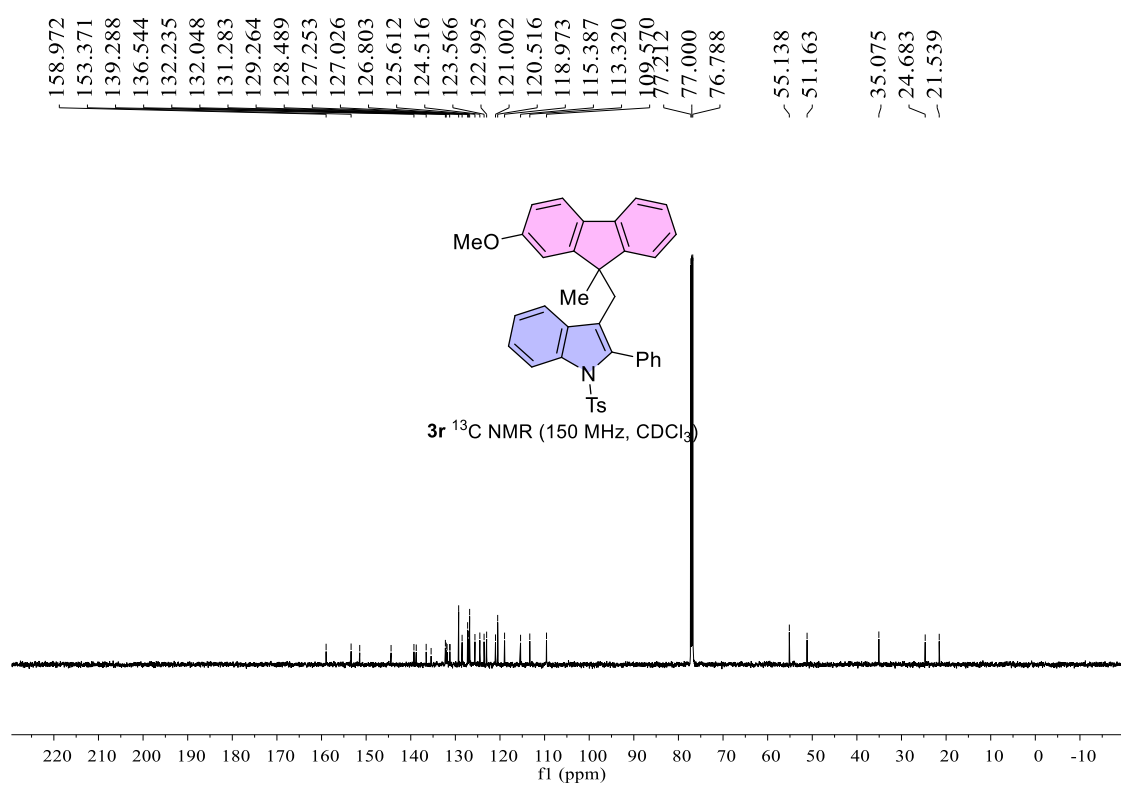

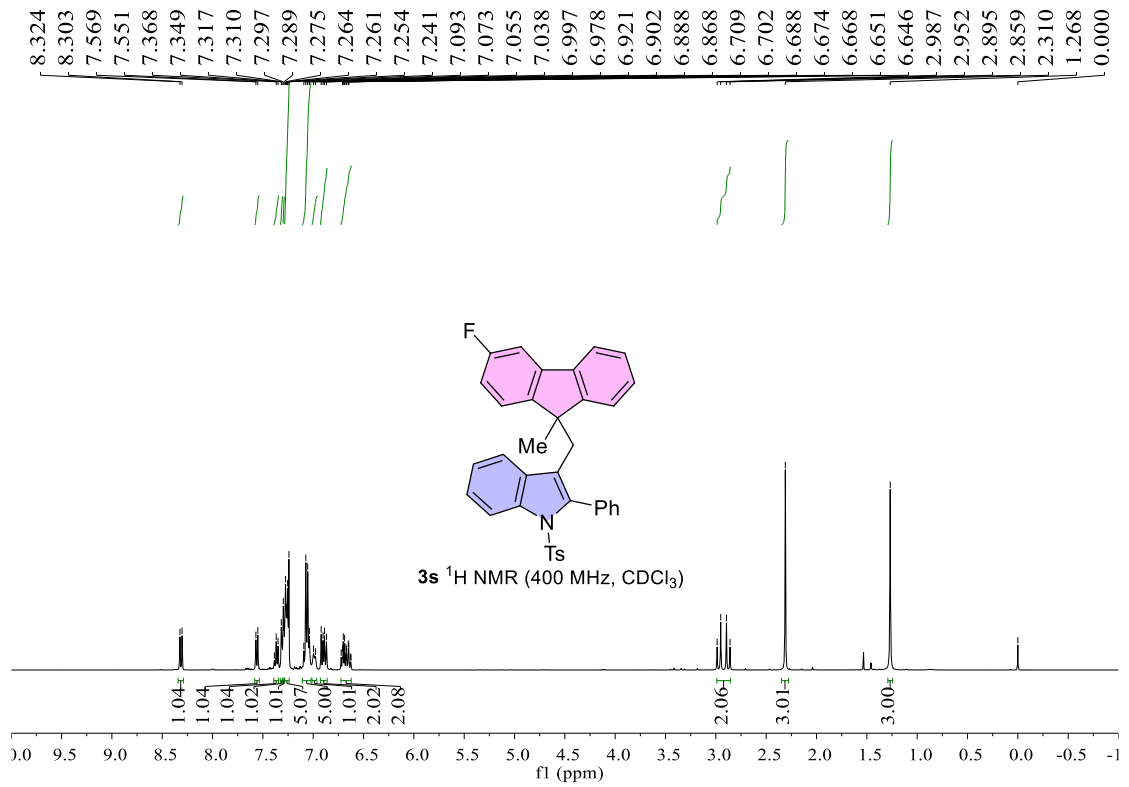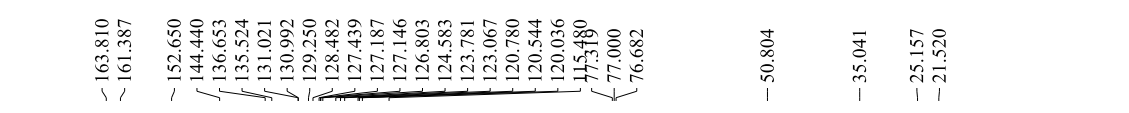

--115.997

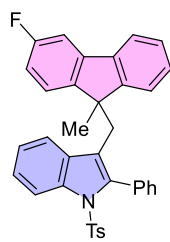

**3s**  $^{19}\text{F}$  NMR (376 MHz,  $\text{CDCl}_3$ )

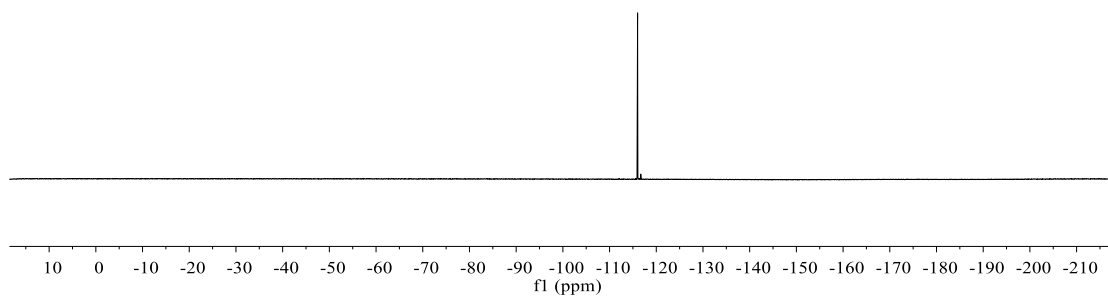

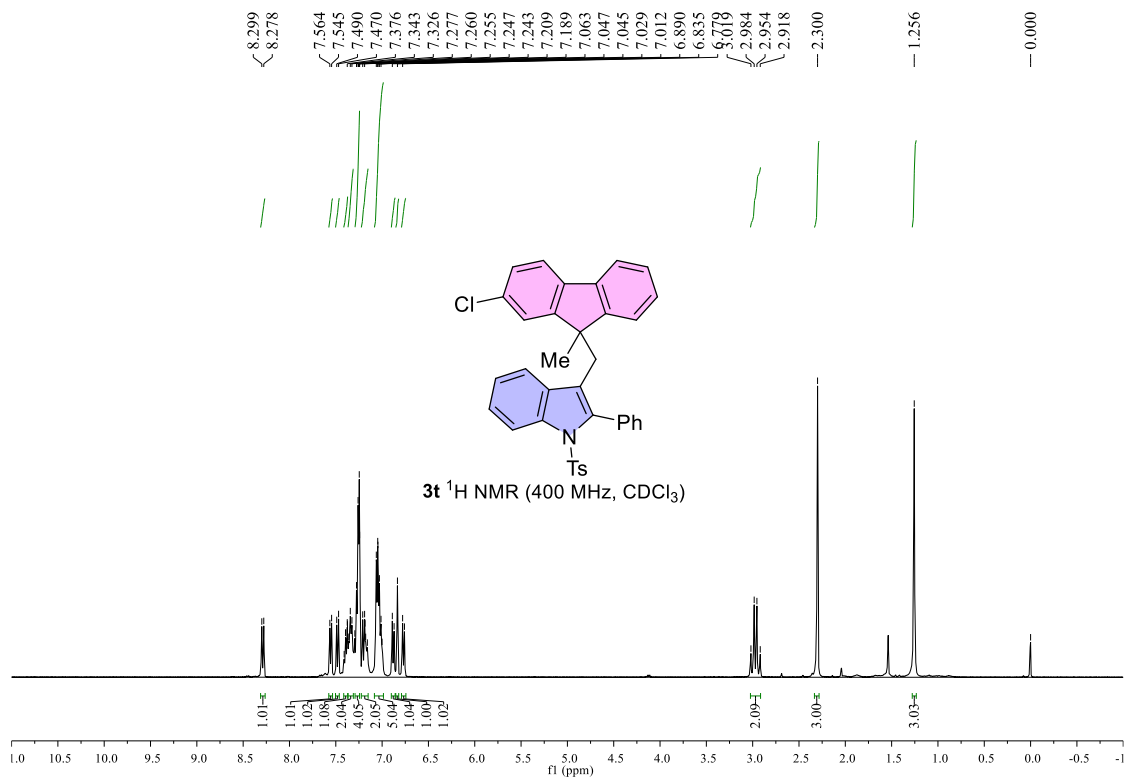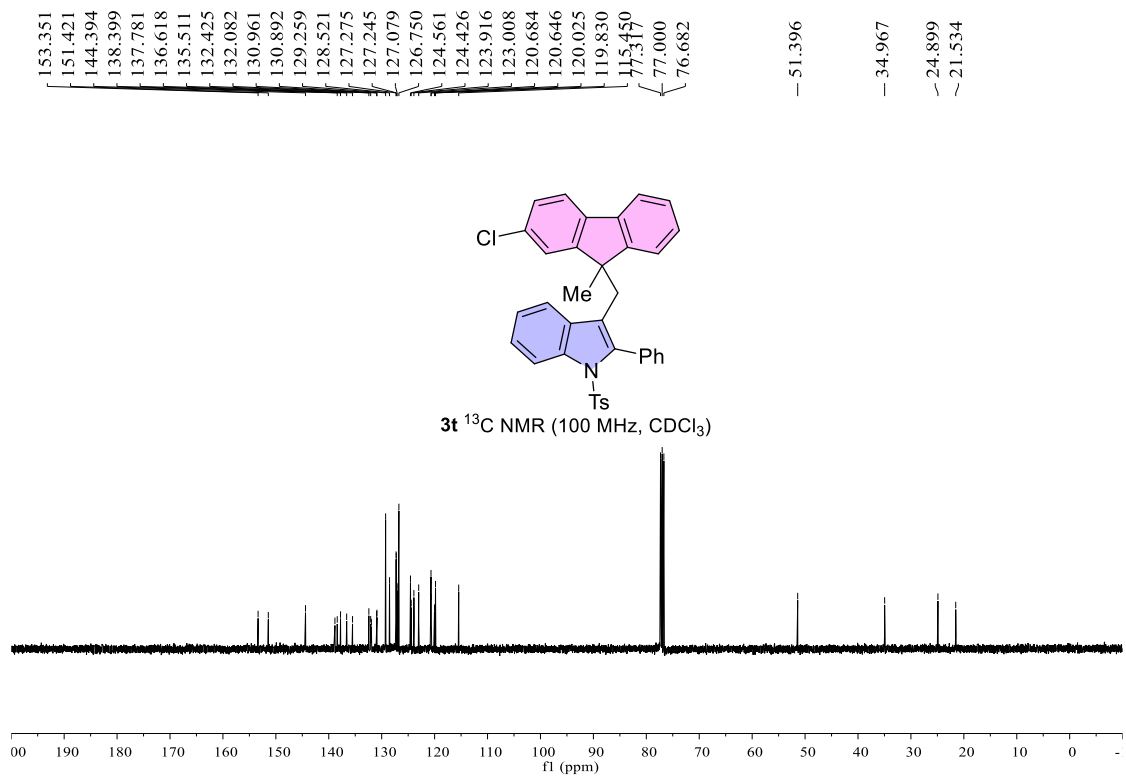

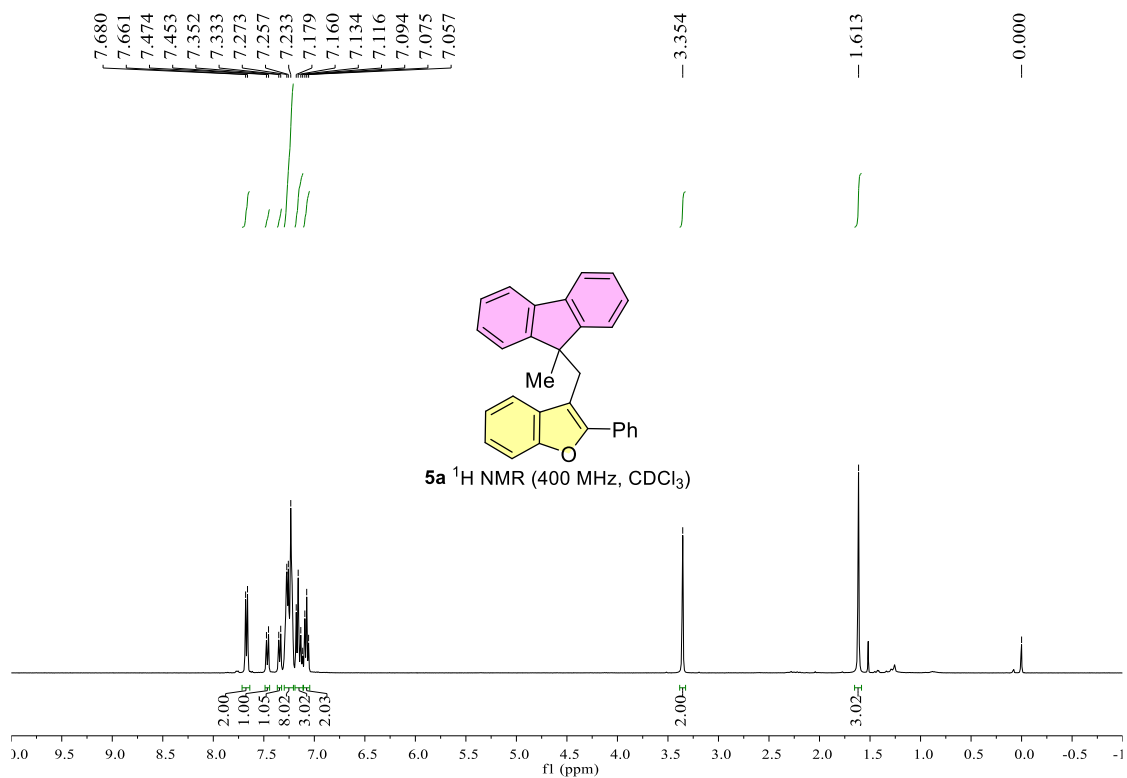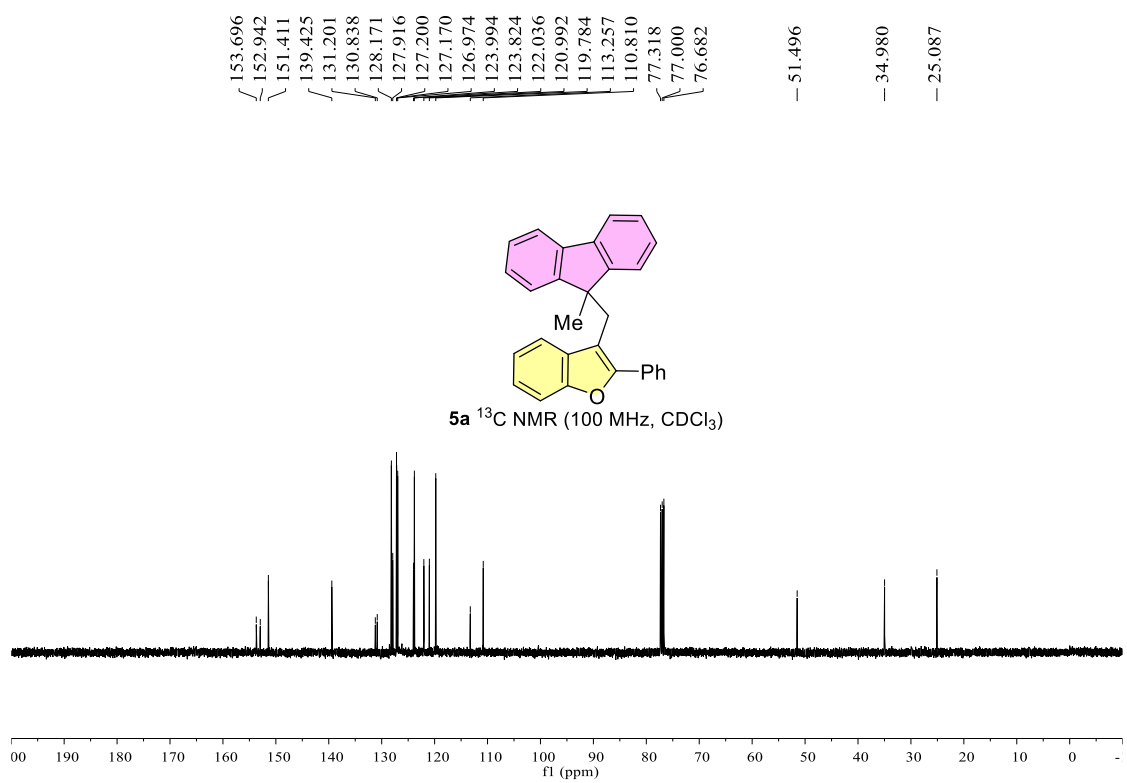

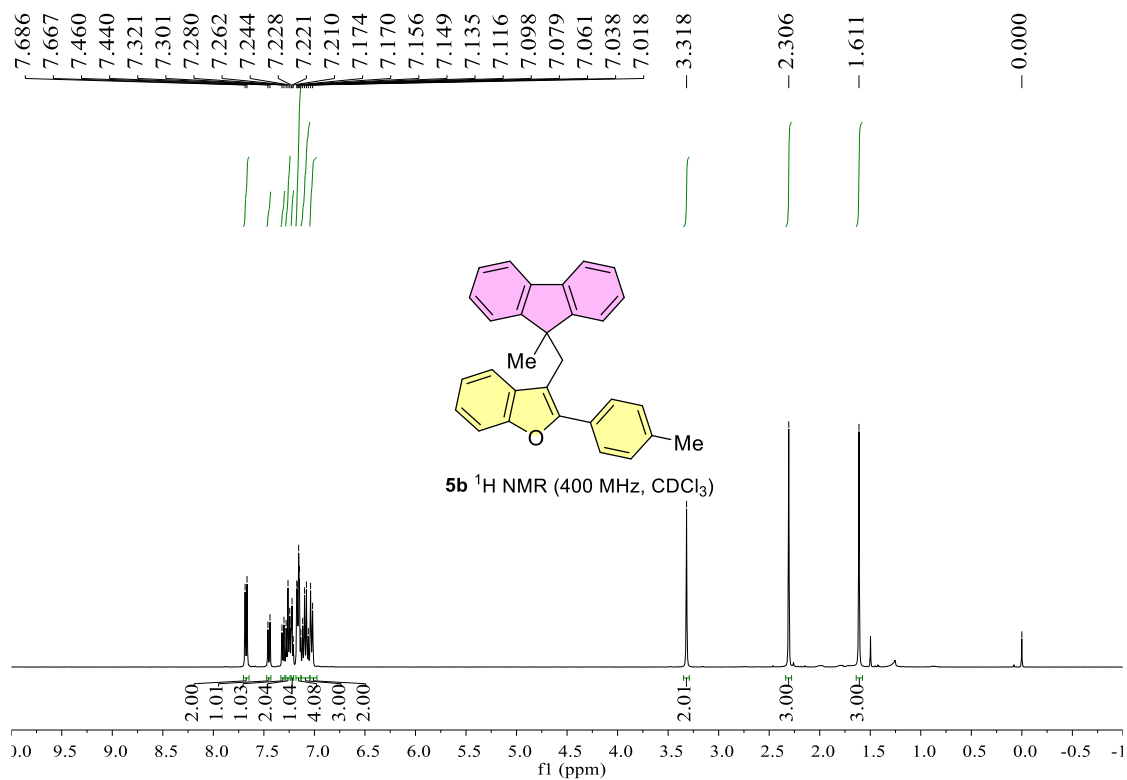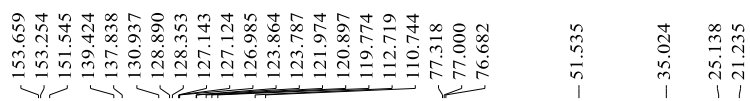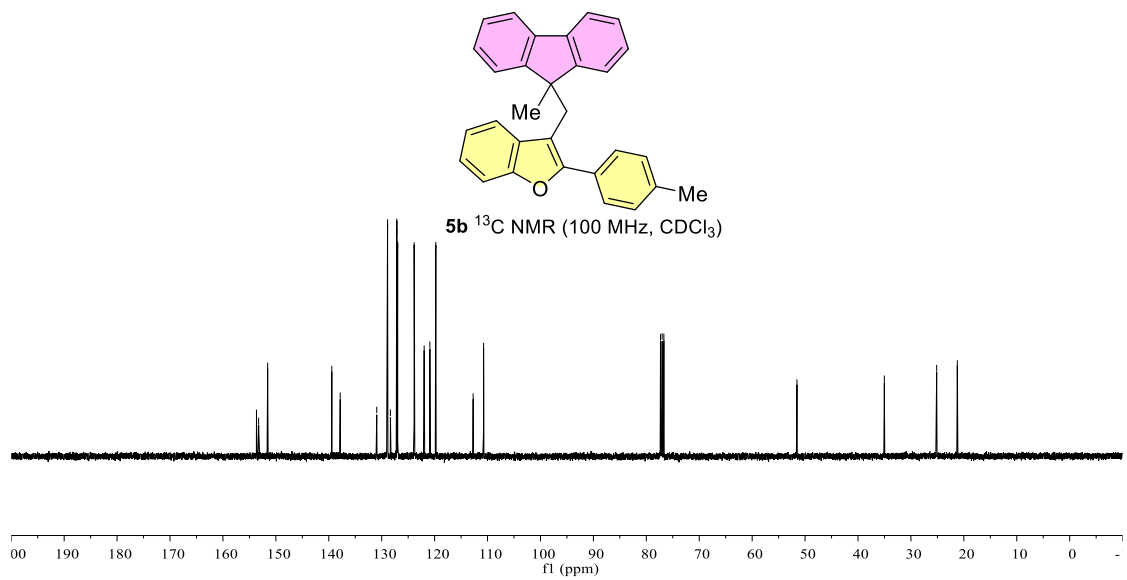

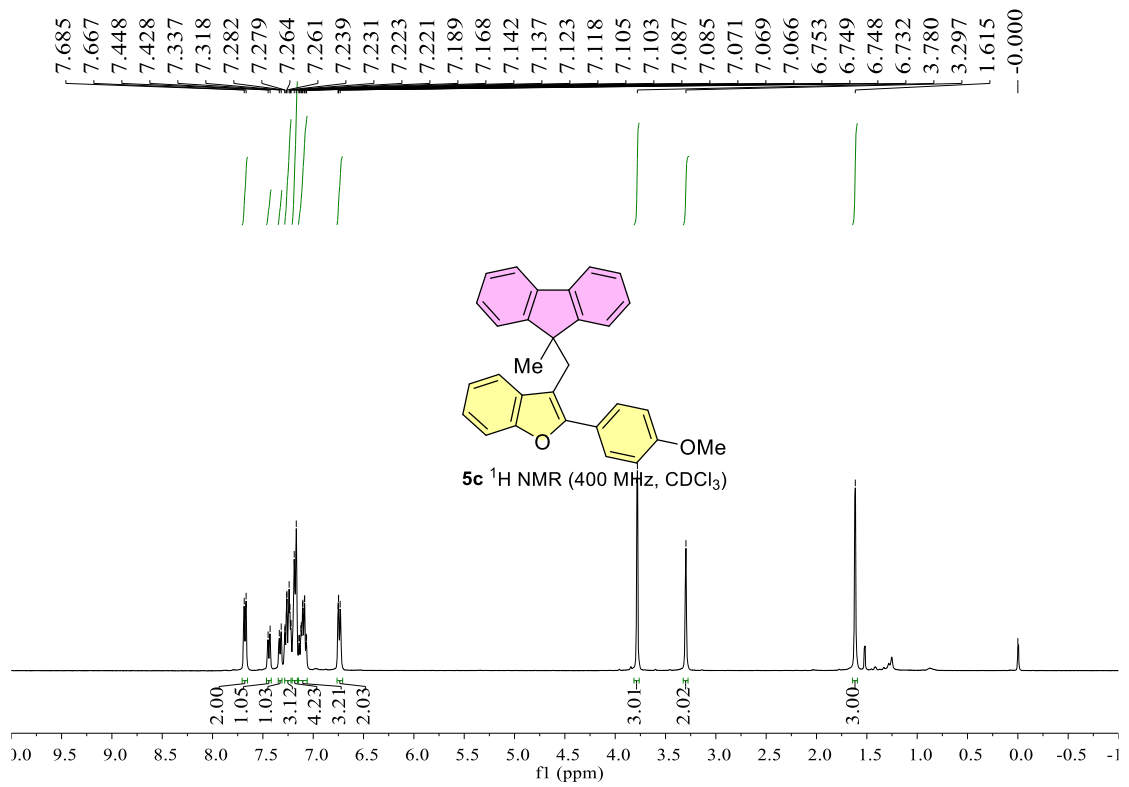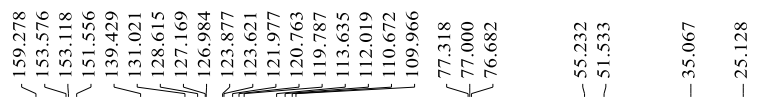

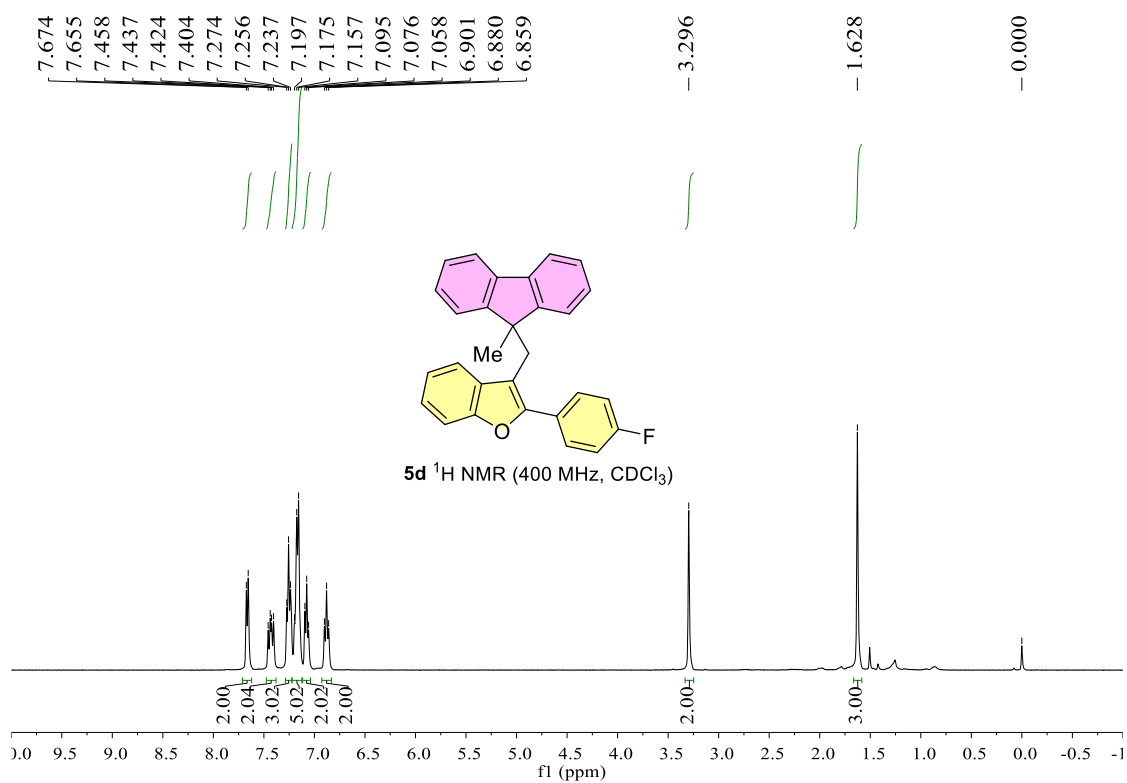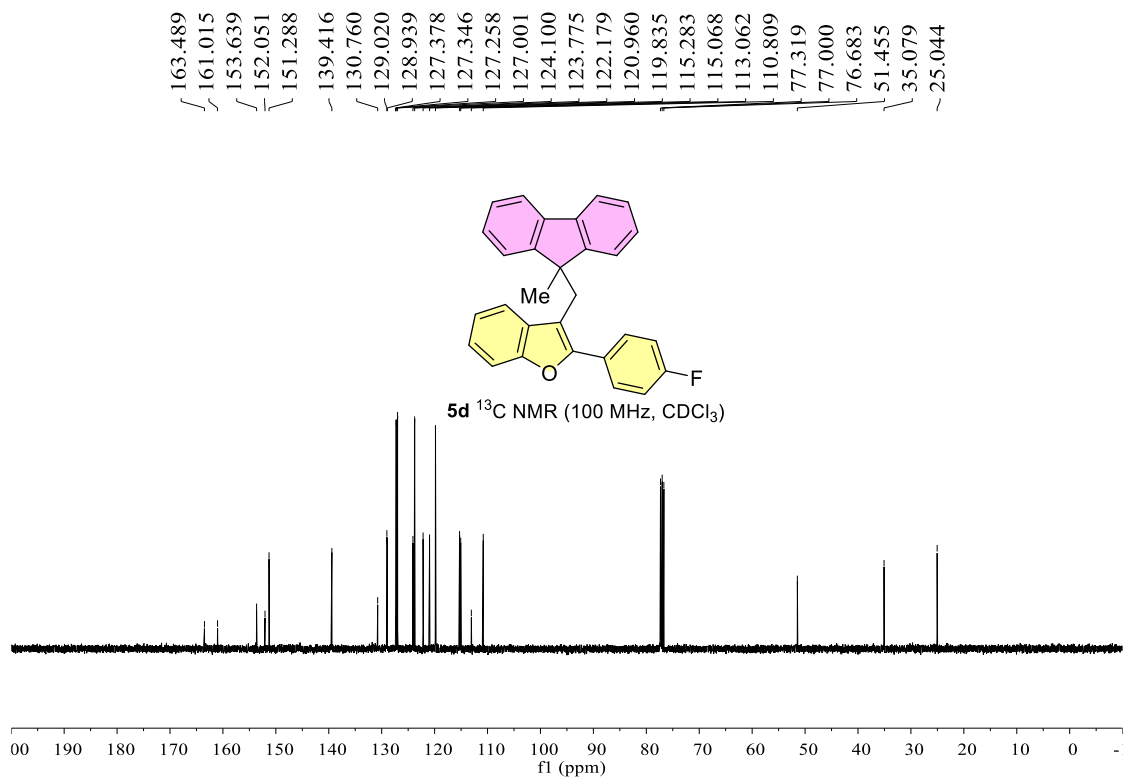

--113.066

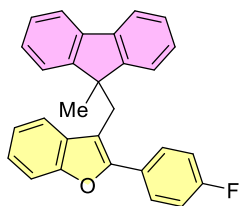

5d  $^{19}\text{F}$  NMR (376 MHz,  $\text{CDCl}_3$ )

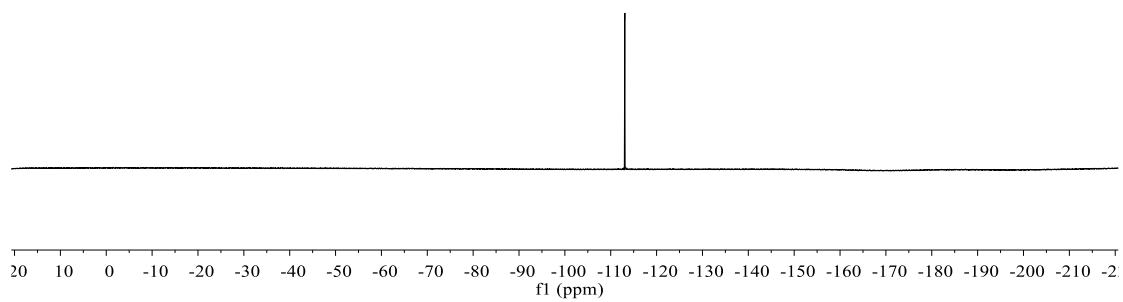

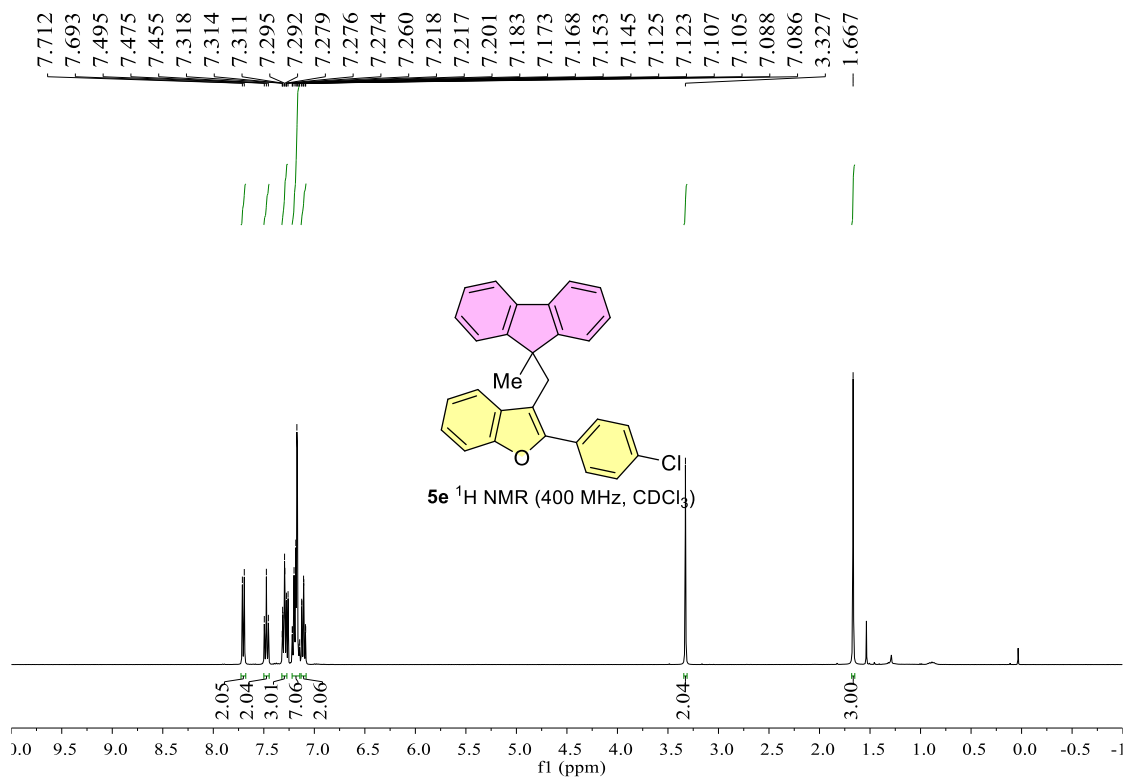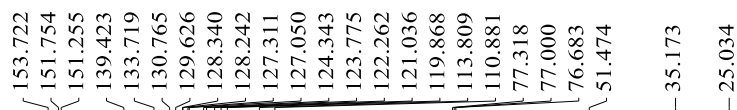

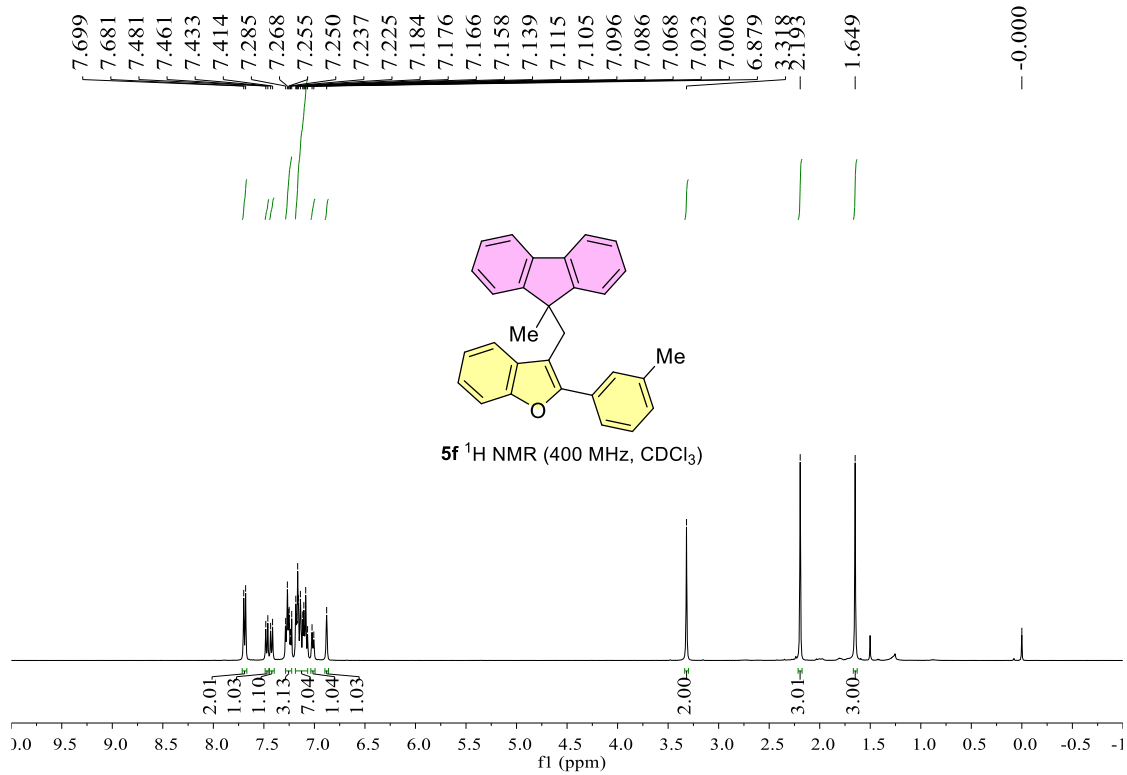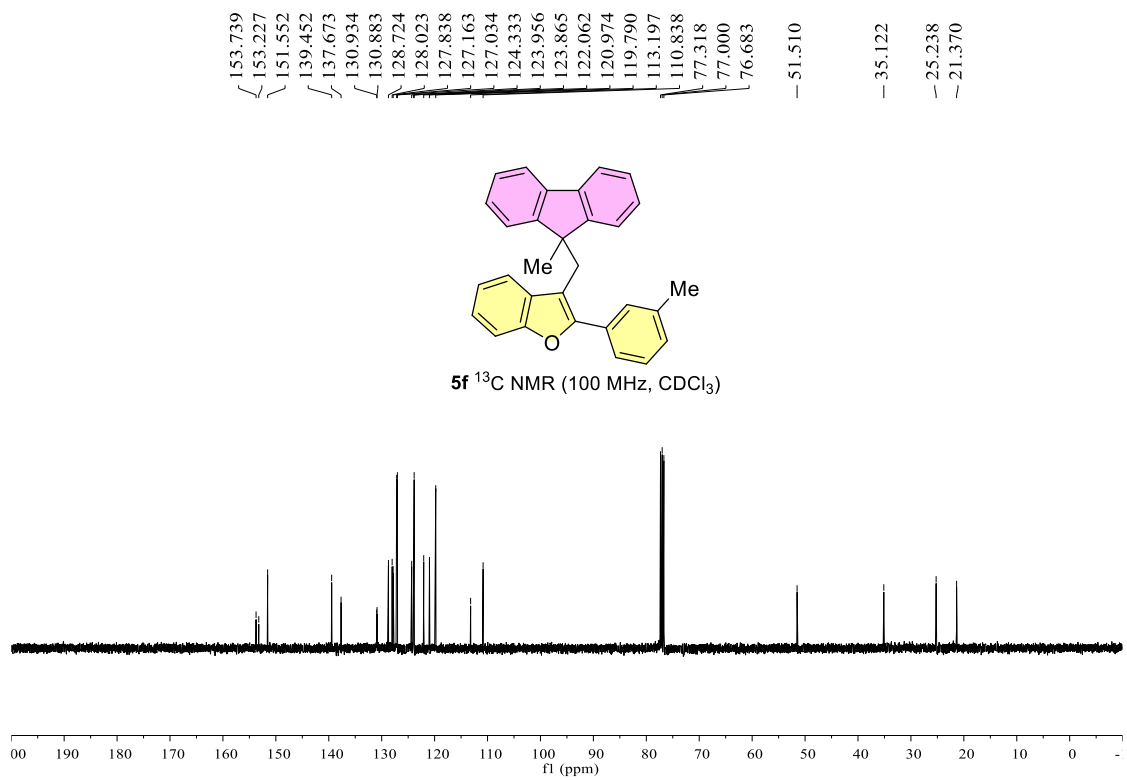

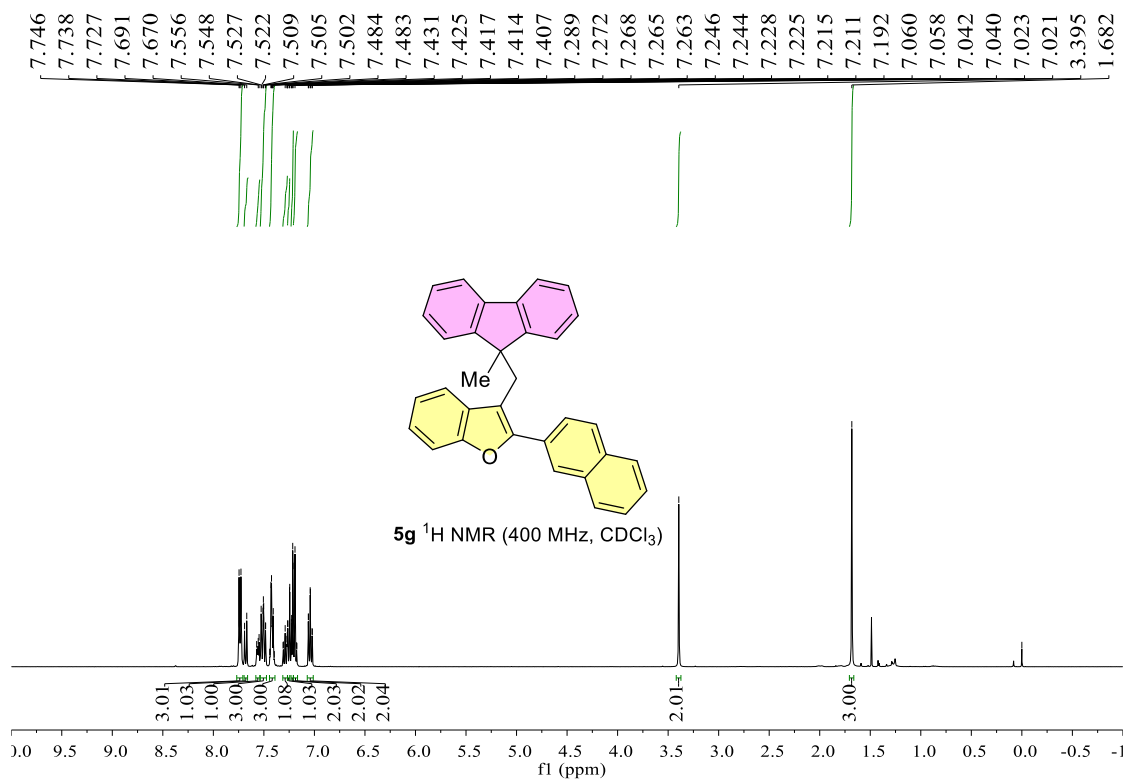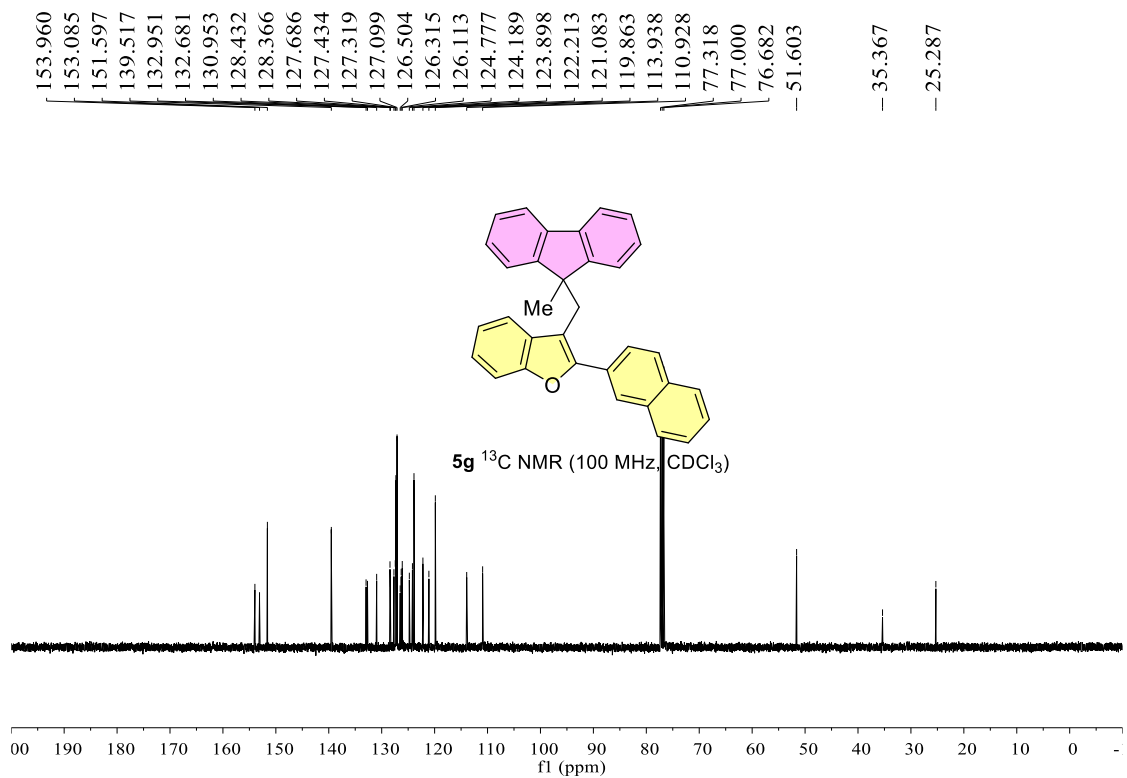

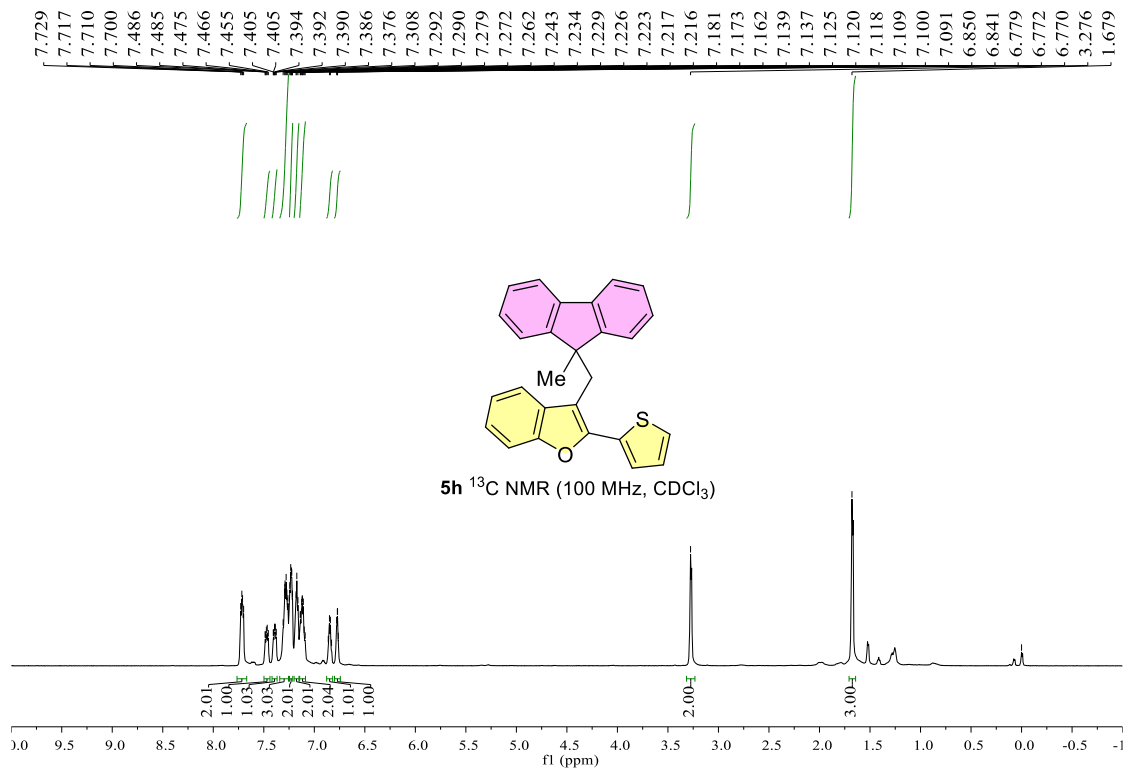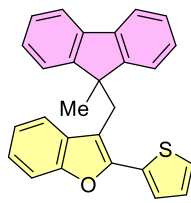

5h <sup>13</sup>C NMR (100 MHz, CDCl<sub>3</sub>)

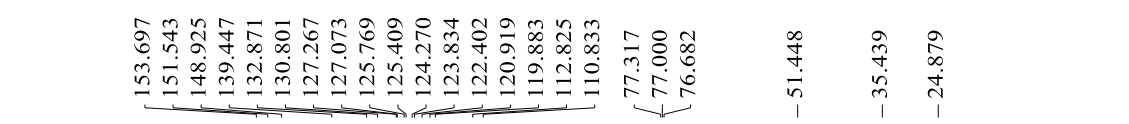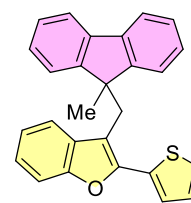

5h <sup>13</sup>C NMR (100 MHz, CDCl<sub>3</sub>)

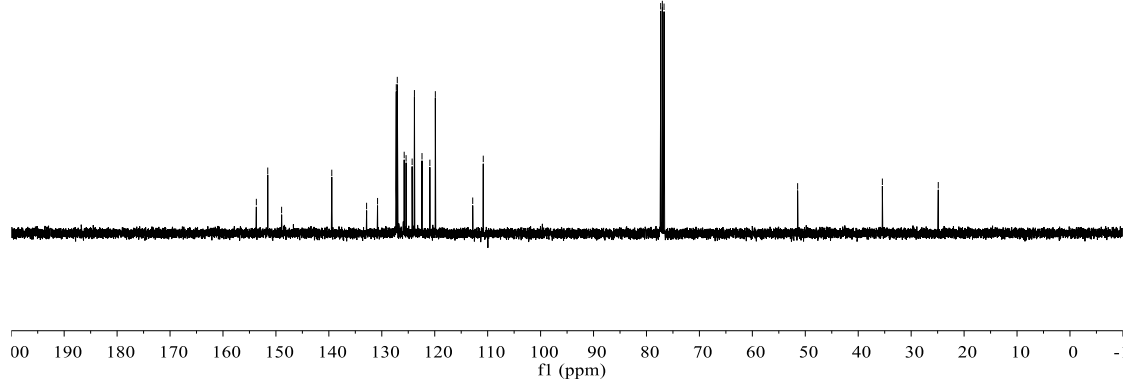

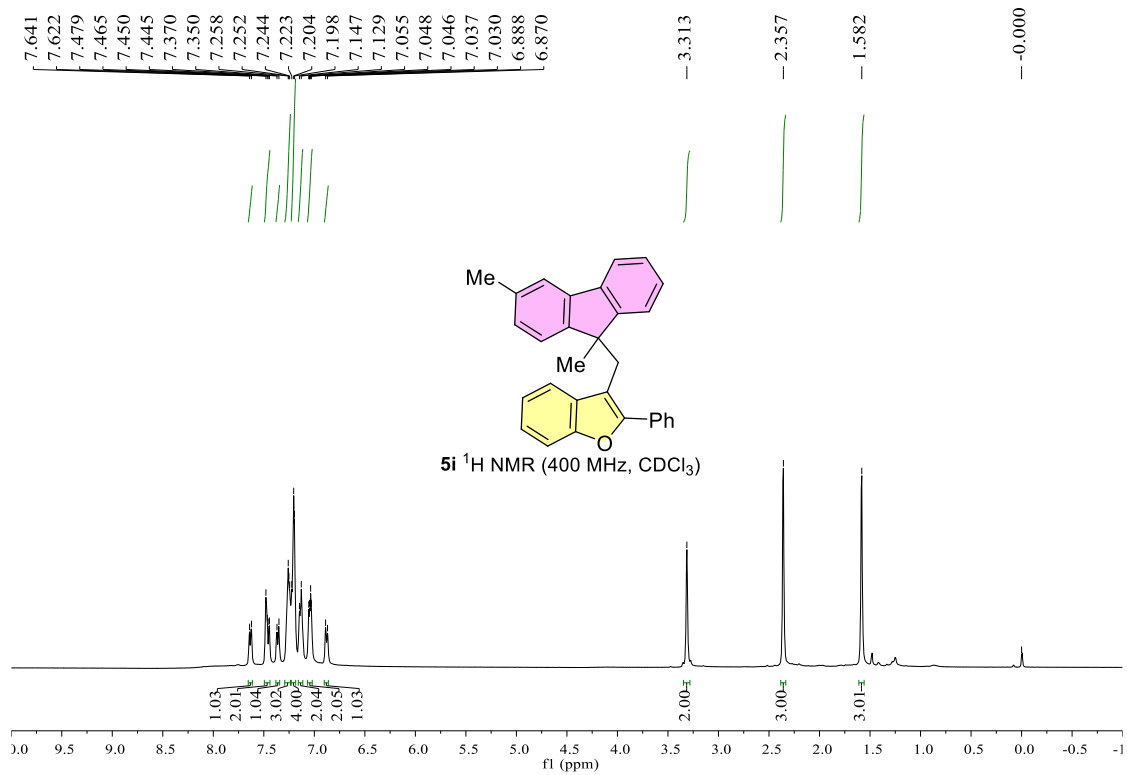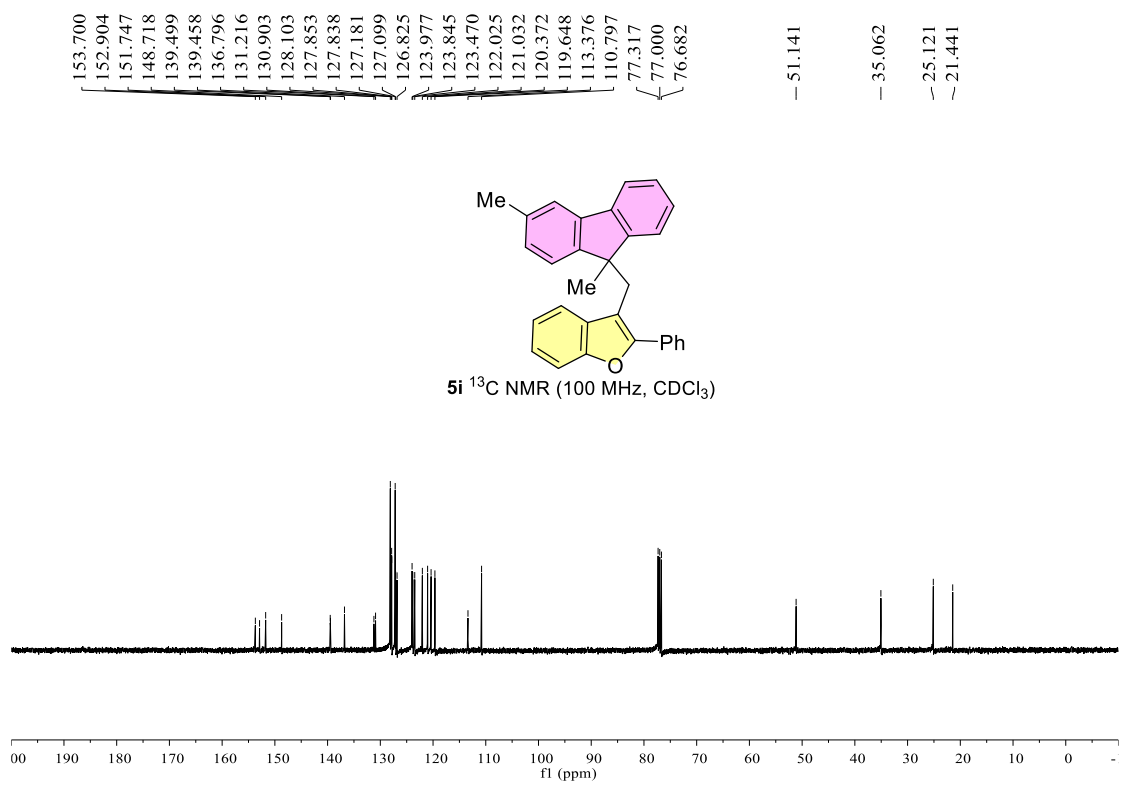

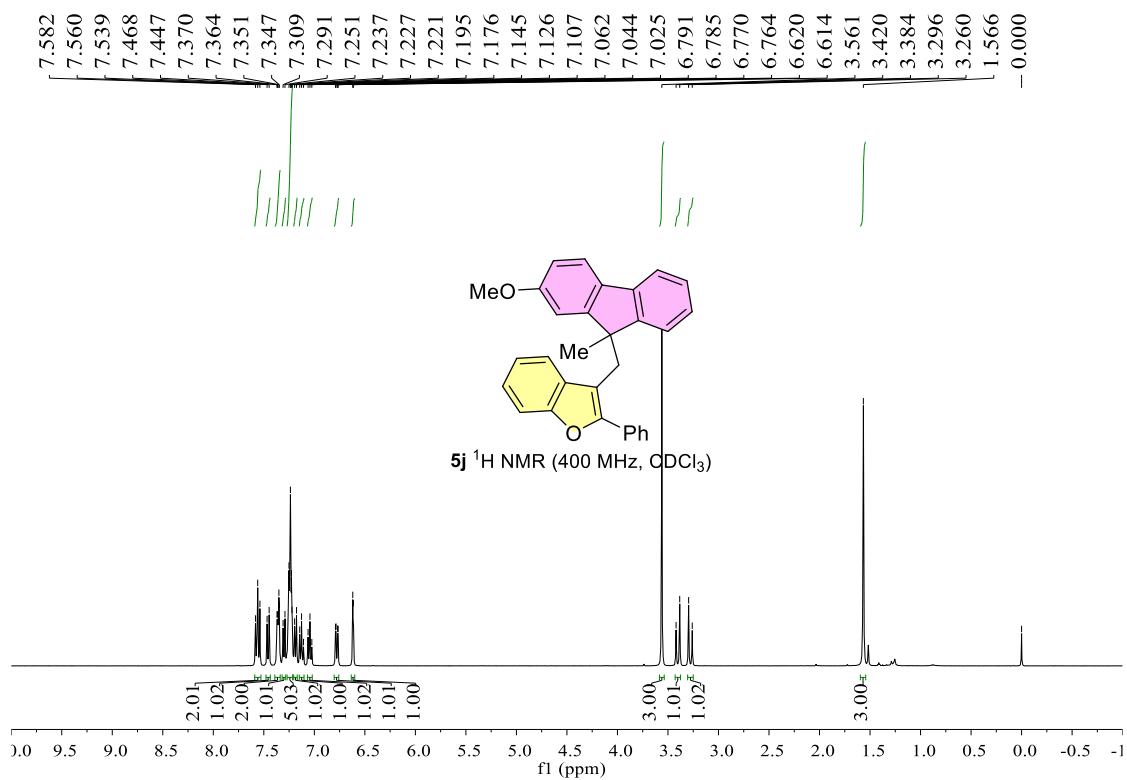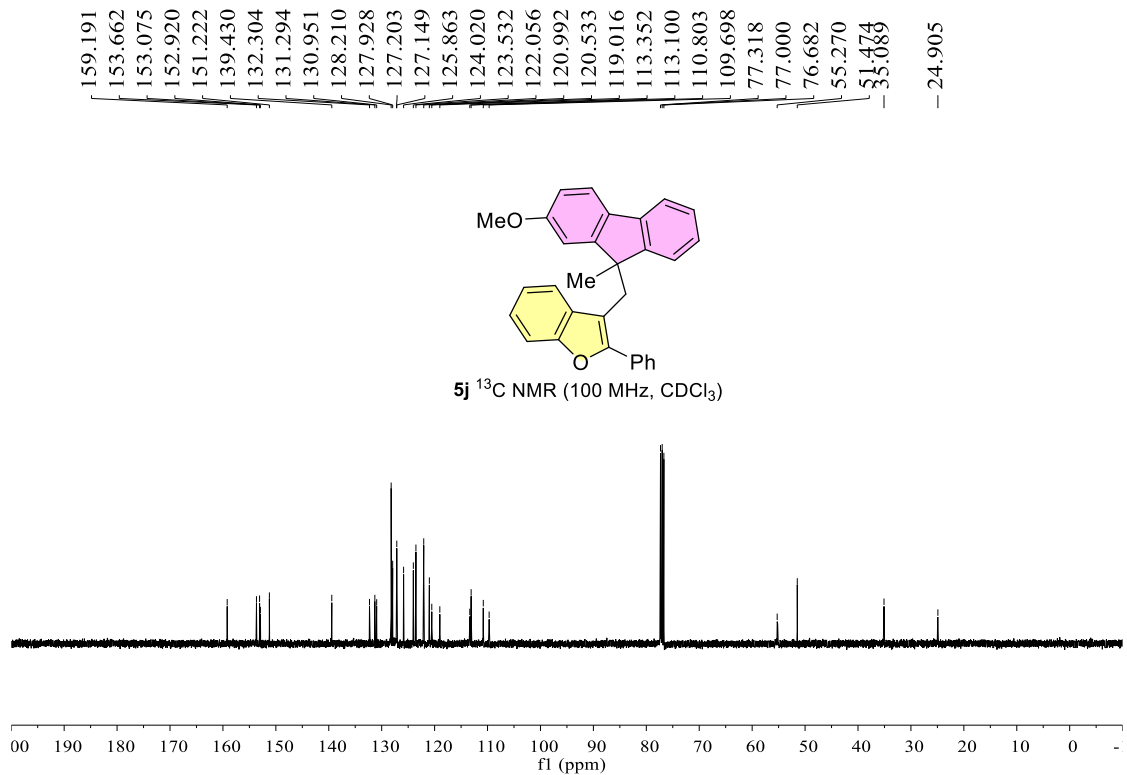

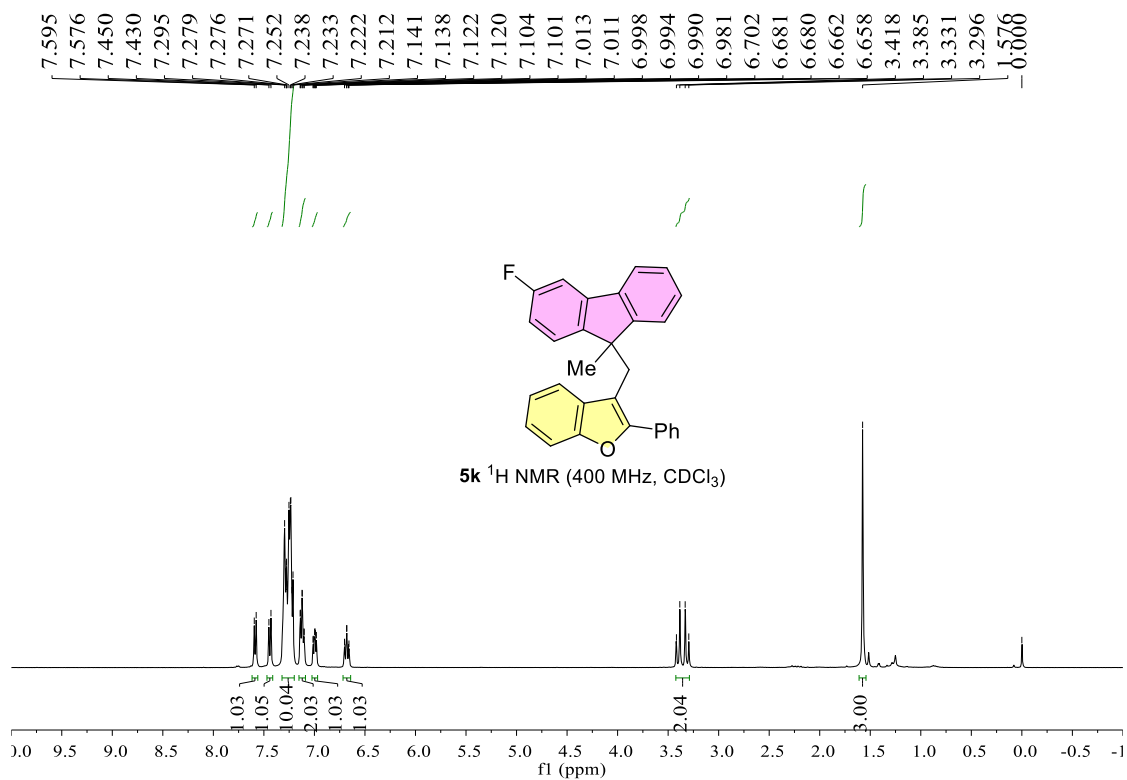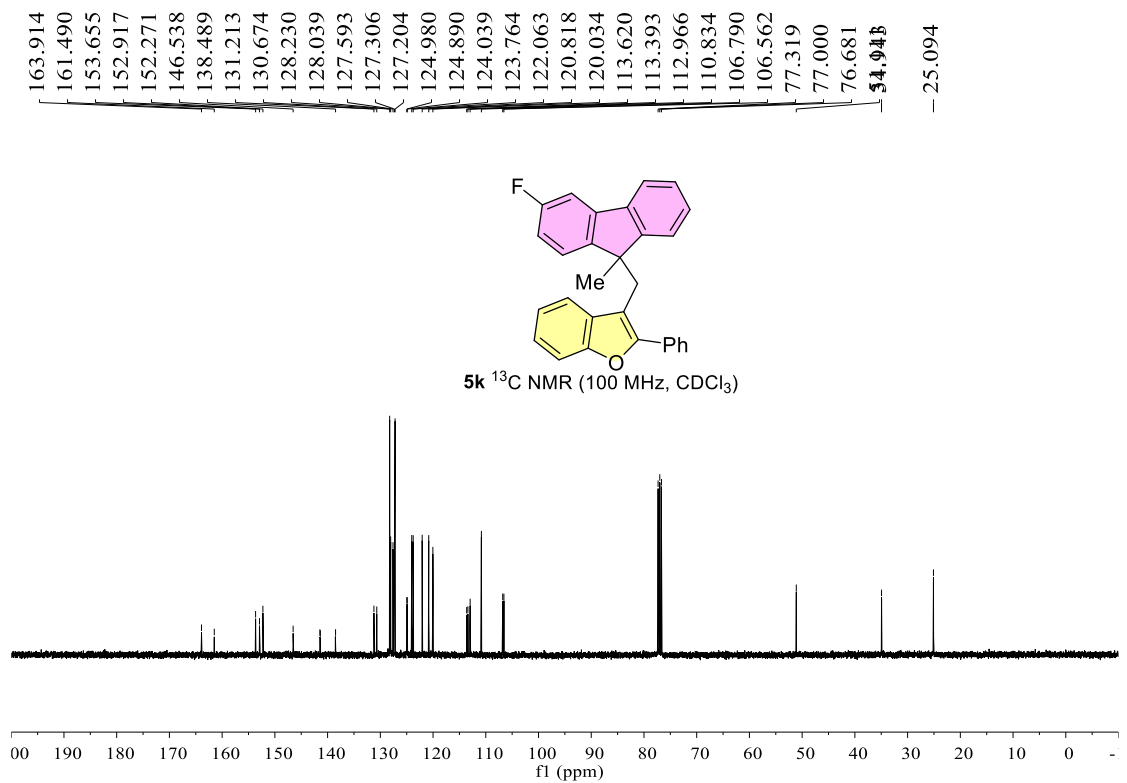

-116.015

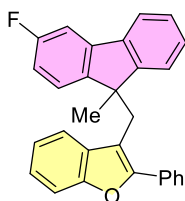

5k  $^{19}\text{F}$  NMR (376 MHz,  $\text{CDCl}_3$ )

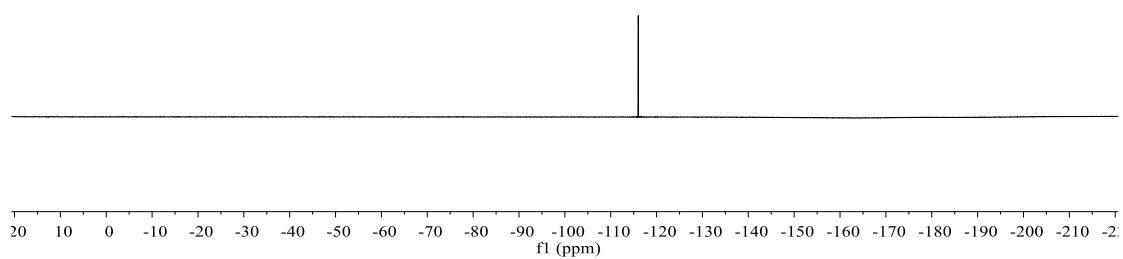

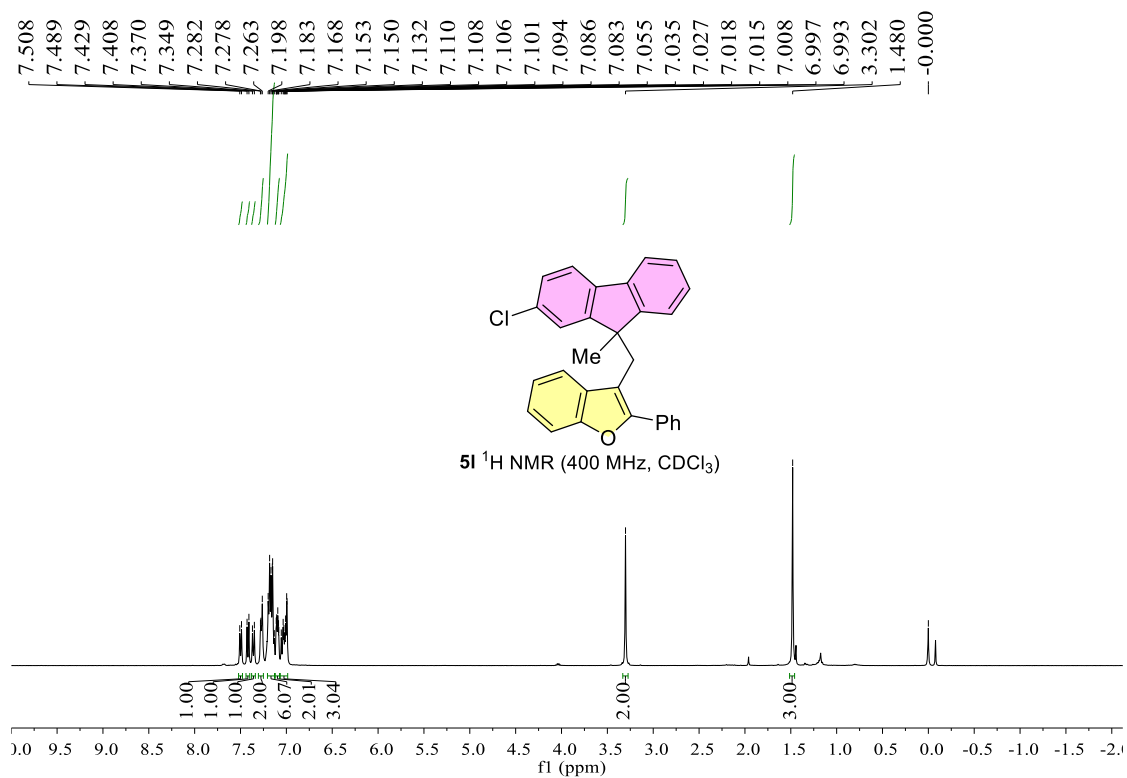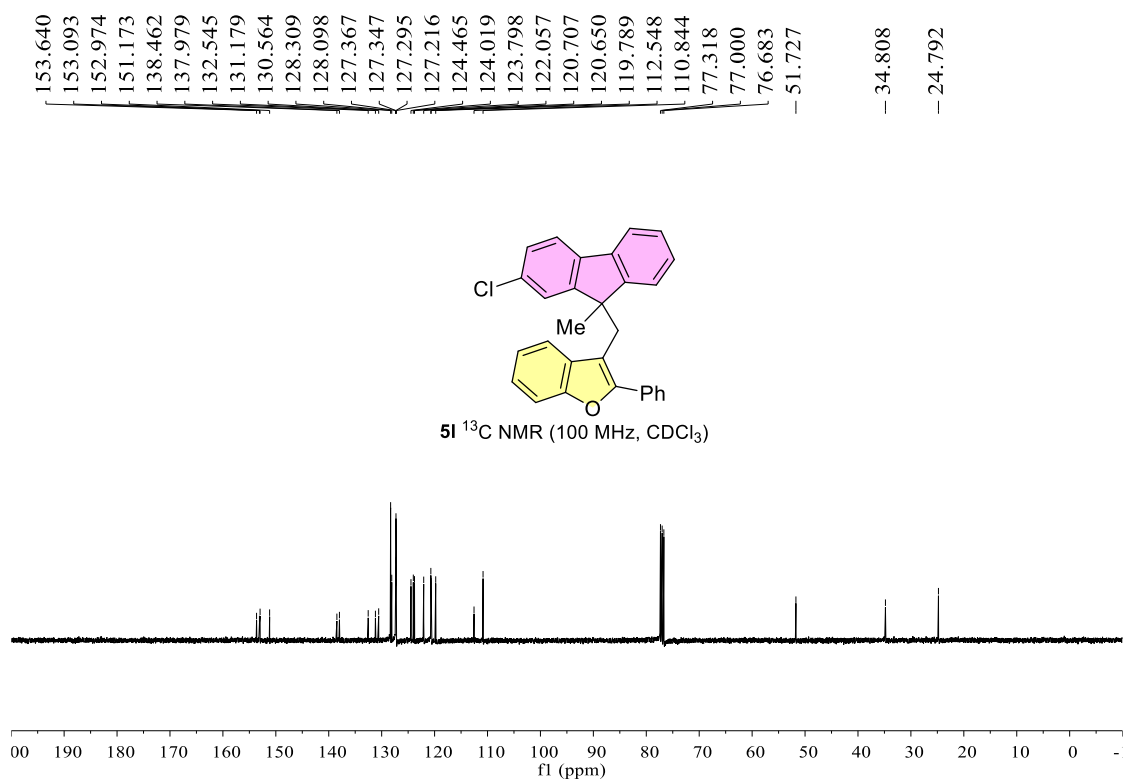

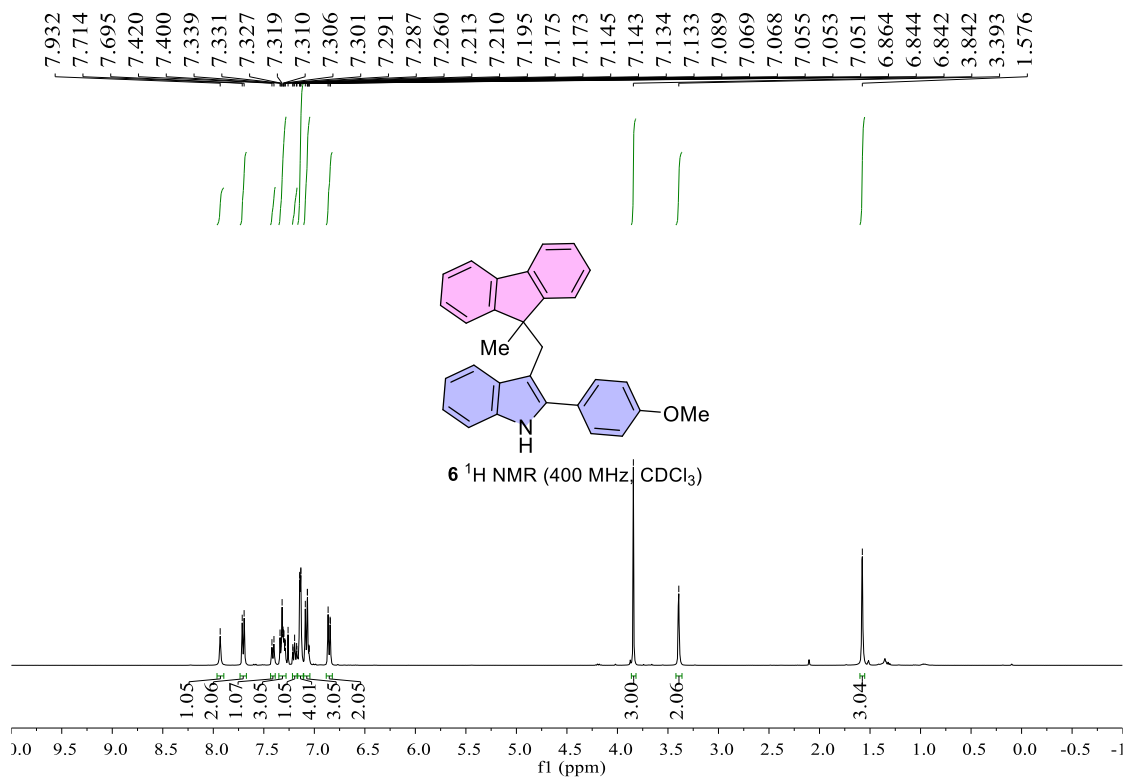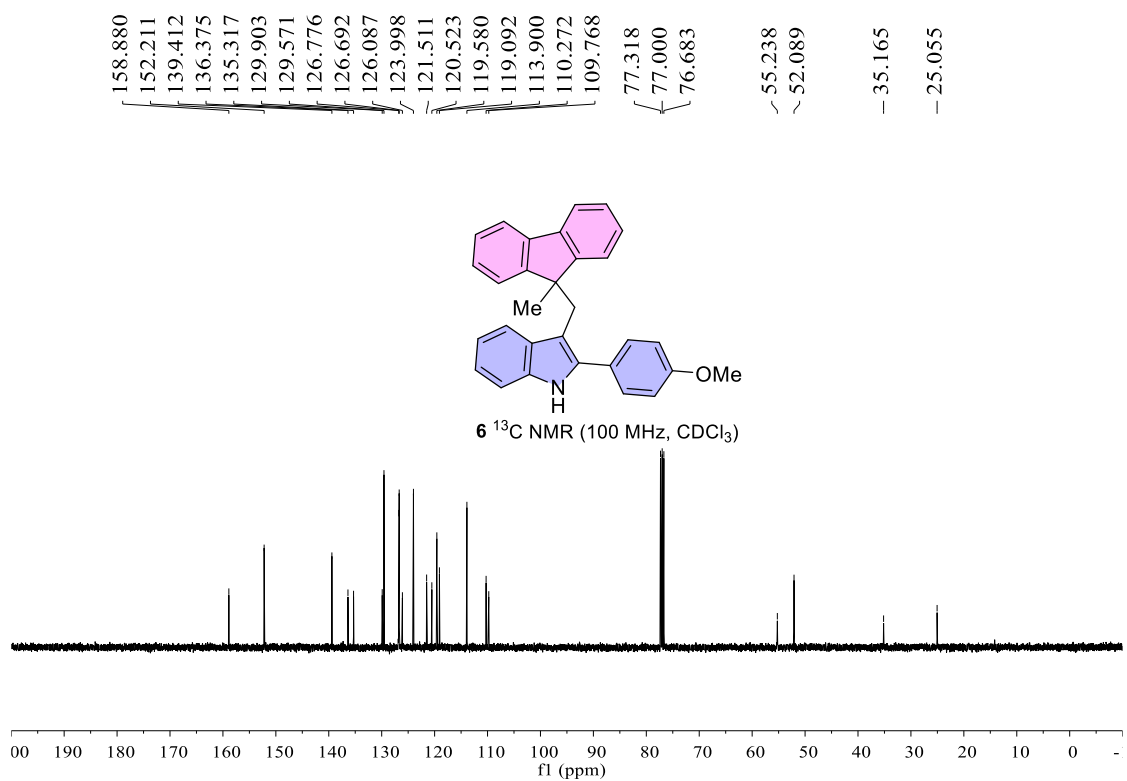

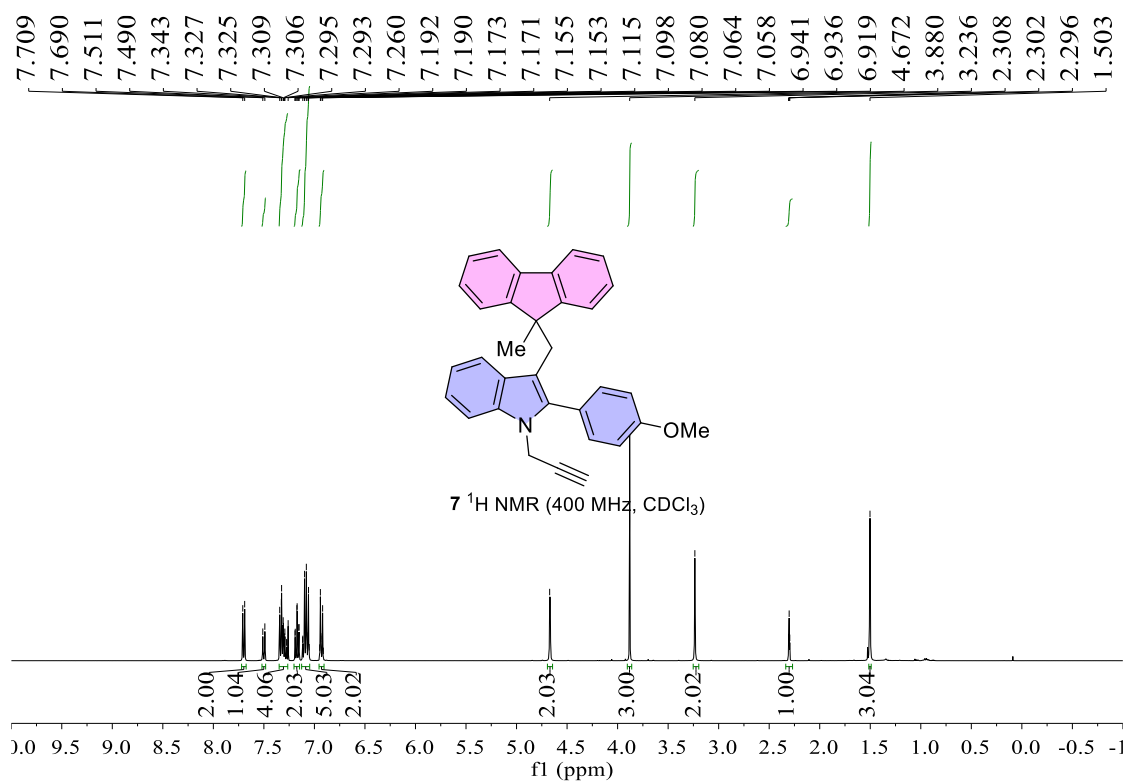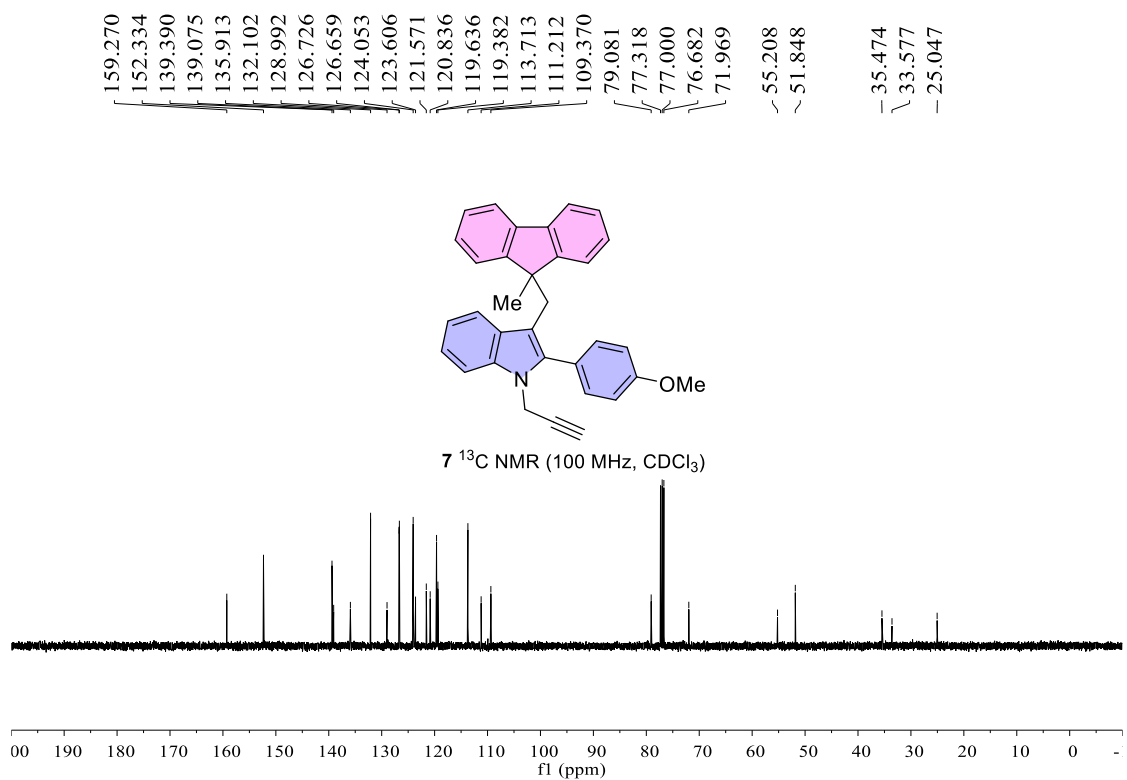

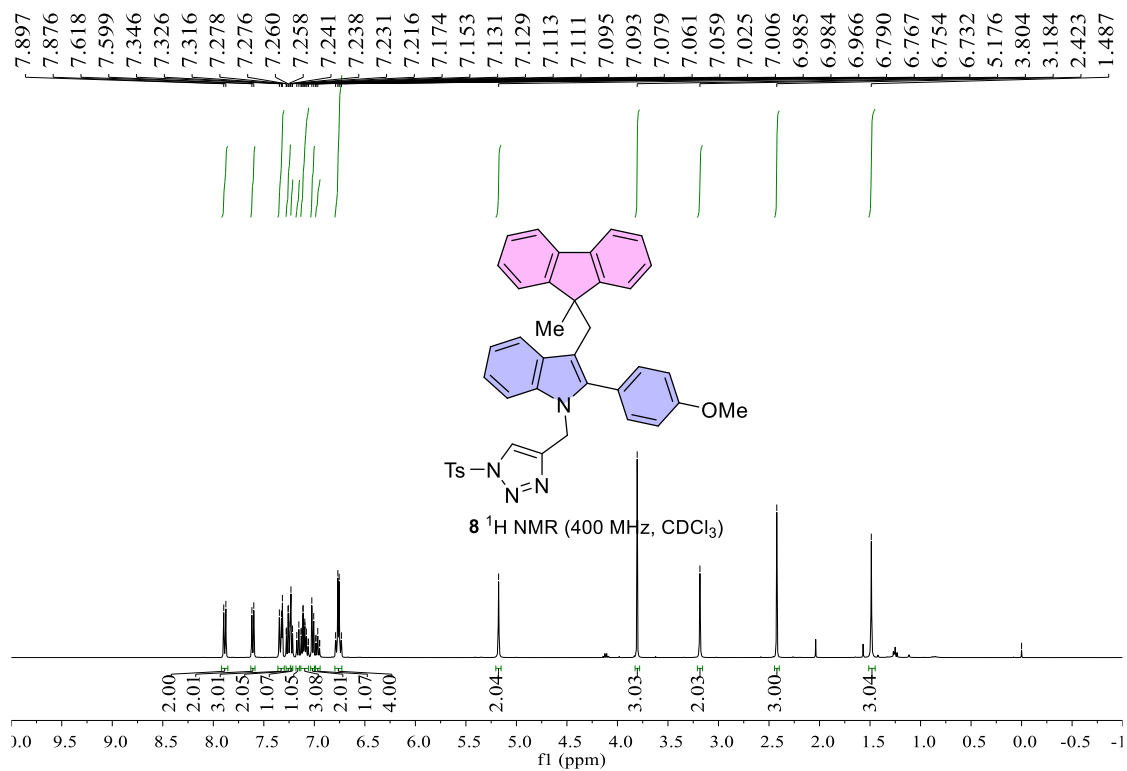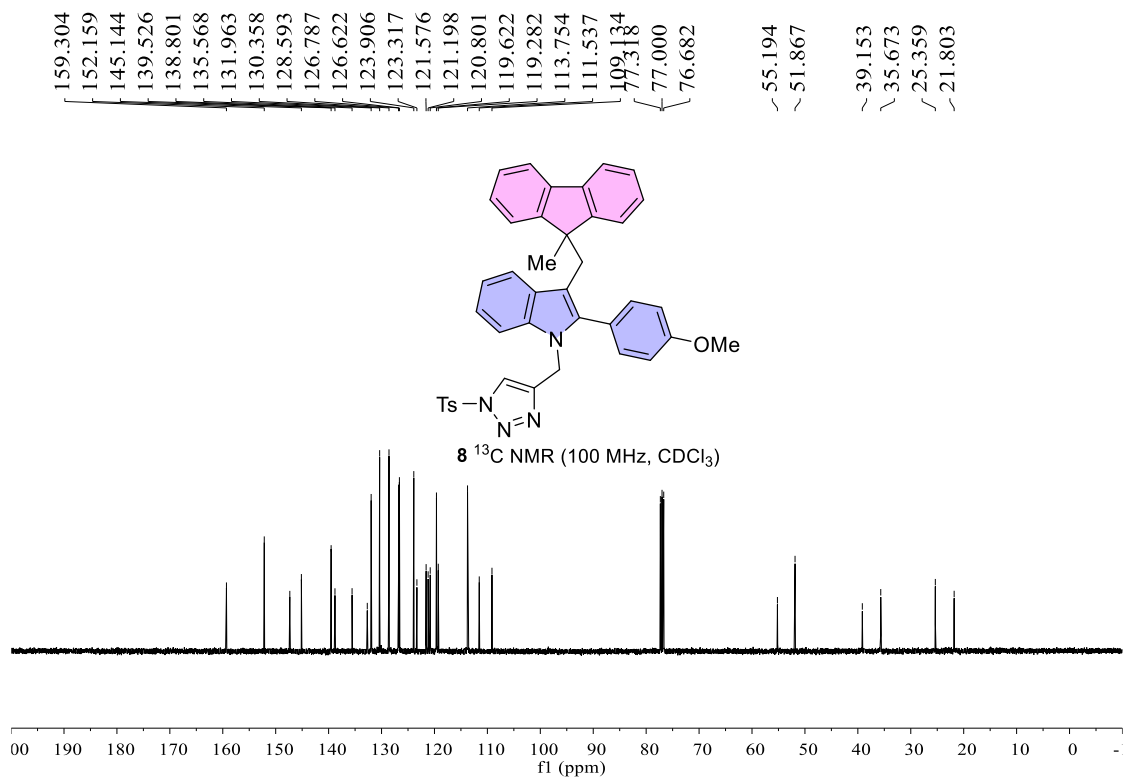

Supplement: d6cc01420h1.pdf [file d6cc01420h1.pdf]
